# Supplementary material
Source: publisher site journal article supplement (https://www.spandidos-publications.com/1106/downloadSupplementary)
Supplement: Supplementary file 1 [file downloadSupplementary]

## Sheet: Sheet1
Table SIII. Expressed level (fragments per kilobase of transcript per million fragments mapped) of genes.
Gene	shCtrl_1st	shCtrl_2nd	shFLNB_1st	shFLNB_2nd	Symbol	Chr	GeneType	Description
ENSG00000164054.15	49.35	41.59	29.62	35.85	SHISA5	chr3	protein_coding	shisa family member 5
ENSG00000257527.1	1.33	0	1.19	1.41	MIR3179-3	chr16	lincRNA	microRNA 3179-3
ENSG00000140830.8	6.68	7.43	6.48	6.93	TXNL4B	chr16	protein_coding	thioredoxin-like 4B
ENSG00000225193.5	0.11	0.46	0	0.37	RPS12P26	chr15	transcribed_processed_pseudogene	ribosomal protein S12 pseudogene 26
ENSG00000204444.10	0.46	0.22	0.14	0.26	APOM	chr6	protein_coding	apolipoprotein M
ENSG00000228477.1	0	0.38	0	0	RP3-342P20.2	chr1	processed_pseudogene
ENSG00000235927.4	1.05	0.32	0.61	0.37	NEXN-AS1	chr1	antisense	NEXN antisense RNA 1
ENSG00000163249.9	4.59	4.36	6.58	5.93	CCNYL1	chr2	protein_coding	cyclin Y-like 1
ENSG00000265808.3	11.21	14.69	18.94	15.28	SEC22B	chr1	protein_coding	SEC22 vesicle trafficking protein homolog B (S. cerevisiae) (gene/pseudogene)
ENSG00000272370.1	0.26	0.09	0	0.21	RP11-307L14.1	chr5	lincRNA
ENSG00000197008.9	1.13	1.01	1.88	0.96	ZNF138	chr7	protein_coding	zinc finger protein 138
ENSG00000180881.19	0.1	0.08	0.12	0.05	CAPS2	chr12	protein_coding	calcyphosine 2
ENSG00000163904.12	5.75	6.55	8.34	7.31	SENP2	chr3	protein_coding	SUMO1/sentrin/SMT3 specific peptidase 2
ENSG00000185710.9	0.42	0.57	0.42	0.61	SMG1P4	chr16	transcribed_unprocessed_pseudogene	SMG1 pseudogene 4
ENSG00000254673.1	23.27	38.13	33.66	26.61	RP11-598P20.5	chr8	protein_coding
ENSG00000100603.13	31.37	37.07	40.48	37.99	SNW1	chr14	protein_coding	SNW domain containing 1
ENSG00000165480.15	6.01	9.53	10.29	7.92	SKA3	chr13	protein_coding	spindle and kinetochore associated complex subunit 3
ENSG00000223861.1	0.18	0	0.08	0.3	RP11-74C1.2	chr1	processed_pseudogene
ENSG00000009413.15	0.71	0.41	1.1	0.48	REV3L	chr6	protein_coding	REV3-like, polymerase (DNA directed), zeta, catalytic subunit
ENSG00000236056.1	0.29	0.88	0.28	0.7	GAPDHP14	chr21	processed_pseudogene	glyceraldehyde-3-phosphate dehydrogenase pseudogene 14
ENSG00000227001.3	1.85	0.41	0.63	0.33	NBPF2P	chr1	unprocessed_pseudogene	neuroblastoma breakpoint family, member 2, pseudogene
ENSG00000224186.8	0.37	0.23	0.32	0.31	C5orf66	chr5	antisense	chromosome 5 open reading frame 66
ENSG00000184988.8	0	0	0.08	0.09	TMEM106A	chr17	protein_coding	transmembrane protein 106A
ENSG00000261118.1	0.04	0.09	0.44	0.1	RP11-104N10.1	chr16	antisense
ENSG00000249199.1	7.31	8.32	11.22	11.15	CTD-2139B15.5	chr5	lincRNA
ENSG00000225217.1	0.19	0.19	0.18	0.44	HSPA7	chr1	unprocessed_pseudogene	heat shock 70kDa protein 7 (HSP70B)
ENSG00000087274.16	16.74	13.91	15.41	20.25	ADD1	chr4	protein_coding	adducin 1 (alpha)
ENSG00000251569.1	0	0	0	0.17	RP11-724O16.1	chr2	protein_coding
ENSG00000269711.1	46.18	47.94	26.1	29.93	CTD-3214H19.16	chr19	protein_coding
ENSG00000123405.13	1.02	1.01	0.75	1.46	NFE2	chr12	protein_coding	nuclear factor, erythroid 2
ENSG00000094880.10	12.04	14.83	13.94	15.79	CDC23	chr5	protein_coding	cell division cycle 23
ENSG00000106624.8	0.03	0	0	0	AEBP1	chr7	protein_coding	AE binding protein 1
ENSG00000197467.13	0.45	0.63	0.31	0.25	COL13A1	chr10	protein_coding	collagen, type XIII, alpha 1
ENSG00000163626.16	1.14	1.54	1.18	1.14	COX18	chr4	protein_coding	COX18 cytochrome c oxidase assembly factor
ENSG00000213956.4	0	0	0	0.08	RP11-269M20.1	chr5	processed_pseudogene
ENSG00000111775.2	305.98	331.65	265.91	237.2	COX6A1	chr12	protein_coding	cytochrome c oxidase subunit VIa polypeptide 1
ENSG00000248787.1	0.32	0	0.45	0.17	RP11-666A20.4	chr3	lincRNA
ENSG00000171962.17	0.61	0.3	0.44	0.58	LRRC48	chr17	protein_coding	leucine rich repeat containing 48
ENSG00000259318.1	0	0	1.16	0.12	RP11-454L9.2	chr14	processed_pseudogene
ENSG00000168874.12	0.26	0.13	0.48	0.37	ATOH8	chr2	protein_coding	atonal homolog 8 (Drosophila)
ENSG00000131323.14	4.82	4.28	5.35	5.73	TRAF3	chr14	protein_coding	TNF receptor-associated factor 3
ENSG00000105993.14	30.98	33.69	34.4	35.35	DNAJB6	chr7	protein_coding	DnaJ (Hsp40) homolog, subfamily B, member 6
ENSG00000112195.8	0	0.11	0	0	TREML2	chr6	protein_coding	triggering receptor expressed on myeloid cells-like 2
ENSG00000107959.15	17.56	15.01	14.31	16.76	PITRM1	chr10	protein_coding	pitrilysin metallopeptidase 1
ENSG00000268975.1	4.64	2.23	2.91	2.64	MIA-RAB4B	chr19	protein_coding	MIA-RAB4B readthrough (NMD candidate)
ENSG00000237886.1	0.17	0.21	0.28	0.44	LINC01573	chr9	antisense	long intergenic non-protein coding RNA 1573
ENSG00000025293.15	10.56	14.02	18.91	19.28	PHF20	chr20	protein_coding	PHD finger protein 20
ENSG00000105229.6	14.56	11.39	10.83	11.51	PIAS4	chr19	protein_coding	protein inhibitor of activated STAT, 4
ENSG00000070950.9	3.07	5.51	6.65	5.24	RAD18	chr3	protein_coding	RAD18 E3 ubiquitin protein ligase
ENSG00000006016.10	9.63	7.68	7.75	10.33	CRLF1	chr19	protein_coding	cytokine receptor-like factor 1
ENSG00000178096.8	6.69	9.53	6.64	6.02	BOLA1	chr1	protein_coding	bolA family member 1
ENSG00000198898.12	11.62	19.81	22.92	19.5	CAPZA2	chr7	protein_coding	capping protein (actin filament) muscle Z-line, alpha 2
ENSG00000278272.1	5.62	7.43	0.56	3.11	HIST1H3C	chr6	protein_coding	histone cluster 1, H3c
ENSG00000188636.3	14.72	8.57	10.54	14.18	LDOC1L	chr22	protein_coding	leucine zipper, down-regulated in cancer 1-like
ENSG00000259205.2	0.08	0.16	0.31	0.29	PRKXP1	chr15	processed_pseudogene	protein kinase, X-linked, pseudogene 1
ENSG00000107902.13	4.66	2.9	2.92	4.03	LHPP	chr10	protein_coding	phospholysine phosphohistidine inorganic pyrophosphate phosphatase
ENSG00000254469.7	0.44	0.4	0.65	0.69	RP11-849H4.2	chr11	protein_coding
ENSG00000183208.12	1.8	0.75	1.04	0.83	GDPGP1	chr15	protein_coding	GDP-D-glucose phosphorylase 1
ENSG00000167157.10	9.92	9.84	6.47	6.52	PRRX2	chr9	protein_coding	paired related homeobox 2
ENSG00000111196.9	8.26	9.64	8.46	8.72	MAGOHB	chr12	protein_coding	mago-nashi homolog B (Drosophila)
ENSG00000260625.2	0	0.63	0	0.17	RP11-452L6.7	chr16	antisense
ENSG00000163481.7	12.33	14.67	11.21	10.82	RNF25	chr2	protein_coding	ring finger protein 25
ENSG00000257359.1	0	0	0	0.06	RP11-780K2.1	chr12	antisense
ENSG00000087077.11	100.89	95.68	78.44	83.63	TRIP6	chr7	protein_coding	thyroid hormone receptor interactor 6
ENSG00000164530.13	0.06	0.16	0.13	0	PI16	chr6	protein_coding	peptidase inhibitor 16
ENSG00000160785.13	14.45	12.45	12.83	15.59	SLC25A44	chr1	protein_coding	solute carrier family 25, member 44
ENSG00000115165.9	0	0	0.13	0	CYTIP	chr2	protein_coding	cytohesin 1 interacting protein
ENSG00000104549.11	21.98	23.78	37.58	40.31	SQLE	chr8	protein_coding	squalene epoxidase
ENSG00000183607.9	0	0.11	0.18	0	GKN2	chr2	protein_coding	gastrokine 2
ENSG00000155428.12	0.03	0	0.03	0	TRIM74	chr7	protein_coding	tripartite motif containing 74
ENSG00000147324.10	9.97	10.06	11.5	14.28	MFHAS1	chr8	protein_coding	malignant fibrous histiocytoma amplified sequence 1
ENSG00000204469.12	97.52	62.97	54.28	75.1	PRRC2A	chr6	protein_coding	proline-rich coiled-coil 2A
ENSG00000172264.16	0.39	0.49	0.39	0.38	MACROD2	chr20	protein_coding	MACRO domain containing 2
ENSG00000185129.5	0.54	0.81	1.24	1.03	PURA	chr5	protein_coding	purine-rich element binding protein A
ENSG00000260345.1	10.19	5.97	7.92	6.25	AC009052.12	chr16	processed_transcript
ENSG00000166401.13	3.53	3.53	4.33	3.52	SERPINB8	chr18	protein_coding	serpin peptidase inhibitor, clade B (ovalbumin), member 8
ENSG00000129103.17	58.45	67.78	54.9	56.38	SUMF2	chr7	protein_coding	sulfatase modifying factor 2
ENSG00000169679.14	26.83	34.28	40.06	38.99	BUB1	chr2	protein_coding	BUB1 mitotic checkpoint serine/threonine kinase
ENSG00000272034.1	0	2	1.67	1.6	SNORD14A	chr11	snoRNA	small nucleolar RNA, C/D box 14A
ENSG00000008710.17	6.24	3.59	4.4	4.92	PKD1	chr16	protein_coding	polycystic kidney disease 1 (autosomal dominant)
ENSG00000179091.4	235.7	220.38	137.21	152.76	CYC1	chr8	protein_coding	cytochrome c-1
ENSG00000148248.13	159.19	155.49	140.61	144.83	SURF4	chr9	protein_coding	surfeit 4
ENSG00000221869.4	10.69	8.65	8.07	9.25	CEBPD	chr8	protein_coding	CCAAT/enhancer binding protein (C/EBP), delta
ENSG00000255400.1	0	0	0	0.07	RP13-631K18.5	chr11	lincRNA
ENSG00000239961.2	0	0	0	0.02	LILRA4	chr19	protein_coding	leukocyte immunoglobulin-like receptor, subfamily A (with TM domain), member 4
ENSG00000131845.14	1.78	1.35	2.21	1.77	ZNF304	chr19	protein_coding	zinc finger protein 304
ENSG00000227972.1	0	0	0.02	0.08	PRKRIRP3	chr10	processed_pseudogene	protein-kinase, interferon-inducible double stranded RNA dependent inhibitor, repressor of (P58 repressor) pseudogene 3
ENSG00000166173.10	2.71	3.17	2.21	2.46	LARP6	chr15	protein_coding	La ribonucleoprotein domain family, member 6
ENSG00000214160.9	45.78	44.65	32.13	35.25	ALG3	chr3	protein_coding	ALG3, alpha-1,3- mannosyltransferase
ENSG00000254565.1	0	0	0	0.07	MTND2P26	chr11	processed_pseudogene	MT-ND2 pseudogene 26
ENSG00000214788.2	0	0	0	0.03	OOSP1	chr11	unitary_pseudogene	oocyte secreted protein 1, pseudogene
ENSG00000228997.1	0	0	0.17	0	RP1-186E20.1	chr10	processed_pseudogene
ENSG00000153044.9	21.36	20.25	25.2	20.69	CENPH	chr5	protein_coding	centromere protein H
ENSG00000107105.14	0	0	0.04	0	ELAVL2	chr9	protein_coding	ELAV like neuron-specific RNA binding protein 2
ENSG00000179163.11	1.97	1.96	2.51	2.27	FUCA1	chr1	protein_coding	fucosidase, alpha-L- 1, tissue
ENSG00000177138.15	0.41	0.09	0.61	0.17	FAM9B	chrX	protein_coding	family with sequence similarity 9, member B
ENSG00000183378.11	0	0.07	0	0	OVCH2	chr11	protein_coding	ovochymase 2 (gene/pseudogene)
ENSG00000213412.3	19.87	24.62	35.14	31.96	HNRNPA1P33	chr10	processed_pseudogene	heterogeneous nuclear ribonucleoprotein A1 pseudogene 33
ENSG00000111667.13	60.03	55.39	42.29	48.35	USP5	chr12	protein_coding	ubiquitin specific peptidase 5 (isopeptidase T)
ENSG00000117411.16	28.58	31.27	24.03	27.61	B4GALT2	chr1	protein_coding	UDP-Gal:betaGlcNAc beta 1,4- galactosyltransferase, polypeptide 2
ENSG00000278919.1	0	0	0.14	0	AP006285.2	chr11	protein_coding
ENSG00000164715.5	6.18	4.78	5.24	6.66	LMTK2	chr7	protein_coding	lemur tyrosine kinase 2
ENSG00000261045.2	0	0	0.27	0	RP11-673P17.4	chr16	lincRNA
ENSG00000264007.1	0	0	0.06	0.69	RP11-68I3.10	chr17	sense_intronic
ENSG00000207002.1	0.35	0	0	0	SNORA5	chr3	snoRNA
ENSG00000261399.1	0	0	0	0.08	LA16c-329F2.1	chr16	antisense
ENSG00000165671.18	3.72	3.7	6.13	6.65	NSD1	chr5	protein_coding	nuclear receptor binding SET domain protein 1
ENSG00000186184.15	10.41	11.73	10.15	9.08	POLR1D	chr13	protein_coding	polymerase (RNA) I polypeptide D, 16kDa
ENSG00000158773.14	20.87	23.2	17.21	20.61	USF1	chr1	protein_coding	upstream transcription factor 1
ENSG00000177614.9	0.01	0.09	0.02	0.02	PGBD5	chr1	protein_coding	piggyBac transposable element derived 5
ENSG00000080561.13	1.58	1.74	1.57	1.96	MID2	chrX	protein_coding	midline 2
ENSG00000275410.4	9.75	6.54	7.02	8.67	HNF1B	chr17	protein_coding	HNF1 homeobox B
ENSG00000175745.11	7.61	6.11	7.44	7.48	NR2F1	chr5	protein_coding	nuclear receptor subfamily 2, group F, member 1
ENSG00000196826.7	0	0	0.04	0.01	CTD-2192J16.17	chr19	protein_coding
ENSG00000200345.2	0	0	0	0.34	RNU6-485P	chr12	snRNA	RNA, U6 small nuclear 485, pseudogene
ENSG00000230772.1	0.11	0	0.05	0.09	VN1R108P	chr20	unprocessed_pseudogene	vomeronasal 1 receptor 108 pseudogene
ENSG00000260619.1	0	0	0	0.04	RP11-775C24.3	chr15	lincRNA
ENSG00000135636.13	1.63	0.75	0.81	1.17	DYSF	chr2	protein_coding	dysferlin
ENSG00000127554.12	16.53	17.48	10.28	12.79	GFER	chr16	protein_coding	growth factor, augmenter of liver regeneration
ENSG00000273036.2	0.71	0.56	1.36	0.53	FAM95C	chr9	lincRNA	family with sequence similarity 95, member C
ENSG00000138172.10	3.59	3.09	2.09	3.19	CALHM2	chr10	protein_coding	calcium homeostasis modulator 2
ENSG00000165533.18	1.56	1.6	2.24	2.8	TTC8	chr14	protein_coding	tetratricopeptide repeat domain 8
ENSG00000166803.10	26.27	34.42	27.15	34.35	KIAA0101	chr15	protein_coding	KIAA0101
ENSG00000234769.7	0.25	0.48	0.73	0.7	WASH4P	chr16	unprocessed_pseudogene	WAS protein family homolog 4 pseudogene
ENSG00000168405.14	0	0	0	0.07	CMAHP	chr6	unitary_pseudogene	cytidine monophospho-N-acetylneuraminic acid hydroxylase, pseudogene
ENSG00000148356.13	16.57	13.02	11.31	13.42	LRSAM1	chr9	protein_coding	leucine rich repeat and sterile alpha motif containing 1
ENSG00000202198.1	929.81	933.71	586.78	906.38	RN7SK	chr6	misc_RNA	RNA, 7SK small nuclear
ENSG00000100401.19	44.27	44.41	35.65	39.47	RANGAP1	chr22	protein_coding	Ran GTPase activating protein 1
ENSG00000126266.3	0	0	0	0.05	FFAR1	chr19	protein_coding	free fatty acid receptor 1
ENSG00000129083.12	21.61	37.05	49.33	43.29	COPB1	chr11	protein_coding	coatomer protein complex, subunit beta 1
ENSG00000144036.14	1.8	1.83	3.05	3.25	EXOC6B	chr2	protein_coding	exocyst complex component 6B
ENSG00000078967.12	3.76	3.45	3.16	3.57	UBE2D4	chr7	protein_coding	ubiquitin-conjugating enzyme E2D 4 (putative)
ENSG00000104976.11	9.3	9	5.59	7.6	SNAPC2	chr19	protein_coding	small nuclear RNA activating complex, polypeptide 2, 45kDa
ENSG00000170089.15	0.1	0.23	0.11	0.29	RP11-423H2.1	chr5	transcribed_unprocessed_pseudogene
ENSG00000224786.1	0.39	0	0.49	0.54	CETN4P	chr4	unitary_pseudogene	centrin EF-hand protein 4, pseudogene
ENSG00000266124.1	0.85	1.72	0.72	0	MIR5587	chr16	miRNA	microRNA 5587
ENSG00000075043.17	0.2	0.18	0.12	0.14	KCNQ2	chr20	protein_coding	potassium channel, voltage gated KQT-like subfamily Q, member 2
ENSG00000112062.10	24.09	21.35	26.29	25.7	MAPK14	chr6	protein_coding	mitogen-activated protein kinase 14
ENSG00000225938.1	0.34	0.34	0	0.18	RP4-575N6.4	chr1	antisense
ENSG00000245748.1	0.13	0	0	0	RP11-367J11.2	chr4	antisense
ENSG00000175701.10	5.21	4.87	2.65	2.05	LINC00116	chr2	protein_coding	long intergenic non-protein coding RNA 116
ENSG00000261783.1	0	0.12	0	1.37	RP11-252K23.2	chr16	sense_intronic
ENSG00000068001.13	15.02	12.07	9.03	10.21	HYAL2	chr3	protein_coding	hyaluronoglucosaminidase 2
ENSG00000226758.1	0.59	0	0	0.1	DISC1-IT1	chr1	sense_intronic	DISC1 intronic transcript 1
ENSG00000269894.1	0.08	0	0.34	0.07	RP11-1020A11.1	chr3	sense_intronic
ENSG00000213411.2	0.25	0	0.15	0	RBM22P2	chr13	processed_pseudogene	RNA binding motif protein 22 pseudogene 2
ENSG00000188536.12	0.97	0.15	0.06	0.48	HBA2	chr16	protein_coding	hemoglobin, alpha 2
ENSG00000166025.17	13.89	10.83	14.1	16.57	AMOTL1	chr11	protein_coding	angiomotin like 1
ENSG00000230797.2	0.89	0.98	1.03	0.89	YY2	chrX	protein_coding	YY2 transcription factor
ENSG00000276178.1	0	0	0.37	0	Y_RNA	chr7	misc_RNA
ENSG00000143375.14	1.25	0.82	1.22	1.07	CGN	chr1	protein_coding	cingulin
ENSG00000161328.10	0.59	0.54	1.42	0.59	LRRC56	chr11	protein_coding	leucine rich repeat containing 56
ENSG00000258116.1	0	1.25	2	0.77	RP11-493L12.6	chr12	processed_pseudogene
ENSG00000211683.3	0.75	0.8	1.02	1.01	KB-1572G7.3	chr22	processed_transcript
ENSG00000229057.1	0	0	0.1	0	RPS3AP54	chr9	processed_pseudogene	ribosomal protein S3a pseudogene 54
ENSG00000204569.9	22.74	16.73	14.94	16.93	PPP1R10	chr6	protein_coding	protein phosphatase 1, regulatory subunit 10
ENSG00000163995.18	0.77	0.62	0.64	0.81	ABLIM2	chr4	protein_coding	actin binding LIM protein family, member 2
ENSG00000232294.5	0	0	0	0.04	RP4-715N11.2	chr20	lincRNA
ENSG00000235859.5	0.29	0.7	0.68	0.44	AC006978.6	chr7	processed_pseudogene
ENSG00000276476.2	0.34	0.85	0.38	0.54	LINC00540	chr13	lincRNA	long intergenic non-protein coding RNA 540
ENSG00000227210.1	0.33	0.93	0	0	AC079145.4	chr2	antisense
ENSG00000167644.11	0.09	1.04	0.43	0.35	C19orf33	chr19	protein_coding	chromosome 19 open reading frame 33
ENSG00000129559.12	21.47	27.31	18.81	16.26	NEDD8	chr14	protein_coding	neural precursor cell expressed, developmentally down-regulated 8
ENSG00000243572.1	0.19	0	0	0	RP11-889D3.2	chr3	lincRNA
ENSG00000148655.14	0.49	0.34	0.46	0.54	C10orf11	chr10	protein_coding	chromosome 10 open reading frame 11
ENSG00000174099.10	2.76	3.61	2.92	2.81	MSRB3	chr12	protein_coding	methionine sulfoxide reductase B3
ENSG00000250564.1	0	0	0.28	0	RP11-215P8.4	chr5	lincRNA
ENSG00000233382.6	0.85	0.86	0.26	0.65	NKAPP1	chrX	transcribed_processed_pseudogene	NFKB activating protein pseudogene 1
ENSG00000214253.8	84.23	94.21	64.32	59.79	FIS1	chr7	protein_coding	fission 1 (mitochondrial outer membrane) homolog (S. cerevisiae)
ENSG00000281856.1	0.25	0.03	0	0.08	RP11-744A16.4	chr17	lincRNA
ENSG00000274225.1	0	0	0	0.11	KB-68A7.1	chr21	lincRNA
ENSG00000279773.1	0	0	0	0.06	AL050303.10	chr21	TEC
ENSG00000099260.10	2.45	1.51	2.35	2.08	PALMD	chr1	protein_coding	palmdelphin
ENSG00000213015.8	6	4.32	2.94	3.2	ZNF580	chr19	protein_coding	zinc finger protein 580
ENSG00000232352.1	0	0.13	0	1.4	SEMA3B-AS1	chr3	antisense	SEMA3B antisense RNA 1 (head to head)
ENSG00000230747.1	0	0.31	0.1	0.44	AC021188.4	chr2	antisense
ENSG00000215375.6	0.38	1.17	0.06	0.38	MYL5	chr4	protein_coding	myosin, light chain 5, regulatory
ENSG00000267283.1	0	1.17	2.53	1.33	AC005306.3	chr19	processed_transcript
ENSG00000158669.11	14.58	14.75	14.08	15.82	AGPAT6	chr8	protein_coding	1-acylglycerol-3-phosphate O-acyltransferase 6
ENSG00000088986.10	121.92	137.26	100.39	89.39	DYNLL1	chr12	protein_coding	dynein, light chain, LC8-type 1
ENSG00000167165.18	0.19	0.08	0	0	UGT1A6	chr2	protein_coding	UDP glucuronosyltransferase 1 family, polypeptide A6
ENSG00000013441.15	9.18	14.86	21.4	15.57	CLK1	chr2	protein_coding	CDC-like kinase 1
ENSG00000198843.12	7.12	14.85	12.29	11.67	SELT	chr3	protein_coding
ENSG00000144579.7	20.58	21.42	16.25	17.61	CTDSP1	chr2	protein_coding	CTD (carboxy-terminal domain, RNA polymerase II, polypeptide A) small phosphatase 1
ENSG00000260583.1	0	0	0.48	0.2	AP000223.42	chr21	antisense
ENSG00000169814.12	4.96	6.42	6.23	6.17	BTD	chr3	protein_coding	biotinidase
ENSG00000228979.4	0	0.09	0	0	CTD-2501B8.5	chr17	processed_pseudogene
ENSG00000271563.1	0	0.06	0	0	HIRAP1	chr10	processed_pseudogene	histone cell cycle regulator pseudogene 1
ENSG00000106714.17	0.92	0.96	1.03	1.07	CNTNAP3	chr9	protein_coding	contactin associated protein-like 3
ENSG00000034713.7	26.26	33.65	24.01	29.6	GABARAPL2	chr16	protein_coding	GABA(A) receptor-associated protein-like 2
ENSG00000166326.6	7.86	10.1	12.39	12.47	TRIM44	chr11	protein_coding	tripartite motif containing 44
ENSG00000259459.5	0	0	0	0.04	RP11-321G12.1	chr15	lincRNA
ENSG00000260274.1	0.67	0.51	0.53	0.2	RP11-817O13.8	chr15	lincRNA
ENSG00000184986.10	1.9	2	1.09	1	TMEM121	chr14	protein_coding	transmembrane protein 121
ENSG00000172339.9	0.92	1.11	0.8	0.69	ALG14	chr1	protein_coding	ALG14, UDP-N-acetylglucosaminyltransferase subunit
ENSG00000230753.5	0	0	0.06	0	ZNF341-AS1	chr20	antisense	ZNF341 antisense RNA 1
ENSG00000274879.1	0	0.25	0.43	0.61	RP11-411G2.1	chr12	processed_pseudogene
ENSG00000148346.11	0.83	1.53	1.28	1.54	LCN2	chr9	protein_coding	lipocalin 2
ENSG00000160801.13	0.12	0.35	0.13	0.03	PTH1R	chr3	protein_coding	parathyroid hormone 1 receptor
ENSG00000048707.13	1.72	1.48	1.99	2.42	VPS13D	chr1	protein_coding	vacuolar protein sorting 13 homolog D (S. cerevisiae)
ENSG00000176978.13	33.22	29.45	25.08	26.48	DPP7	chr9	protein_coding	dipeptidyl-peptidase 7
ENSG00000244378.1	0.17	0	0.16	0.08	RPS2P45	chr16	transcribed_processed_pseudogene	ribosomal protein S2 pseudogene 45
ENSG00000196357.11	0.26	0.68	0.86	0.93	ZNF565	chr19	protein_coding	zinc finger protein 565
ENSG00000136197.12	4.67	5.86	5.69	6.19	C7orf25	chr7	protein_coding	chromosome 7 open reading frame 25
ENSG00000206341.7	0.29	1.33	0.9	1	HLA-H	chr6	unprocessed_pseudogene	major histocompatibility complex, class I, H (pseudogene)
ENSG00000261519.3	0.09	0.12	0	0.06	RP11-403P17.4	chr16	lincRNA
ENSG00000021488.12	0.03	0.03	0	0	SLC7A9	chr19	protein_coding	solute carrier family 7 (amino acid transporter light chain, bo,+ system), member 9
ENSG00000129946.10	0.45	0.55	0.18	0.12	SHC2	chr19	protein_coding	SHC (Src homology 2 domain containing) transforming protein 2
ENSG00000118564.14	4.26	5.05	5.12	5.07	FBXL5	chr4	protein_coding	F-box and leucine-rich repeat protein 5
ENSG00000015568.12	0	0	0.01	0.01	RGPD5	chr2	protein_coding	RANBP2-like and GRIP domain containing 5
ENSG00000135477.11	0.46	0.56	0.54	0.06	KRT87P	chr12	transcribed_unprocessed_pseudogene	keratin 87 pseudogene
ENSG00000276071.1	0	0	0	0.11	CTD-3234P18.6	chr19	lincRNA
ENSG00000196584.2	2.17	4.16	4.69	4.08	XRCC2	chr7	protein_coding	X-ray repair complementing defective repair in Chinese hamster cells 2
ENSG00000135446.16	125.68	143.45	102.83	100.28	CDK4	chr12	protein_coding	cyclin-dependent kinase 4
ENSG00000205209.7	0.05	0.05	0.06	0.07	SCGB2B2	chr19	protein_coding	secretoglobin, family 2B, member 2
ENSG00000108559.11	23.83	24.78	27.42	25.64	NUP88	chr17	protein_coding	nucleoporin 88kDa
ENSG00000144635.8	13.08	17.68	15.09	15.06	DYNC1LI1	chr3	protein_coding	dynein, cytoplasmic 1, light intermediate chain 1
ENSG00000167553.14	283.71	280.71	215.29	228.72	TUBA1C	chr12	protein_coding	tubulin, alpha 1c
ENSG00000137700.16	17.05	12.63	10.02	12.12	SLC37A4	chr11	protein_coding	solute carrier family 37 (glucose-6-phosphate transporter), member 4
ENSG00000167216.16	0.32	0.71	1	0.86	KATNAL2	chr18	protein_coding	katanin p60 subunit A-like 2
ENSG00000100242.15	37.12	32.19	28.09	35.47	SUN2	chr22	protein_coding	Sad1 and UNC84 domain containing 2
ENSG00000224531.5	3.08	5.22	6.08	6.61	SMIM13	chr6	protein_coding	small integral membrane protein 13
ENSG00000113013.12	144.01	144.47	163.16	163.4	HSPA9	chr5	protein_coding	heat shock 70kDa protein 9 (mortalin)
ENSG00000177963.12	39.27	32.87	31.82	33.05	RIC8A	chr11	protein_coding	RIC8 guanine nucleotide exchange factor A
ENSG00000008226.19	0	0	0.04	0	DLEC1	chr3	protein_coding	deleted in lung and esophageal cancer 1
ENSG00000125124.11	5.69	5.88	5.28	6.67	BBS2	chr16	protein_coding	Bardet-Biedl syndrome 2
ENSG00000066032.18	0	0	0.03	0	CTNNA2	chr2	protein_coding	catenin (cadherin-associated protein), alpha 2
ENSG00000260691.5	0.07	0	0	0	ANKRD20A1	chr9	protein_coding	ankyrin repeat domain 20 family, member A1
ENSG00000264346.1	0.36	1.46	1.52	2.34	SNORA77	chr22	snoRNA	small nucleolar RNA, H/ACA box 77
ENSG00000166866.12	0.15	0.11	0.32	0.28	MYO1A	chr12	protein_coding	myosin IA
ENSG00000197580.11	0.13	0.03	0.09	0.12	BCO2	chr11	protein_coding	beta-carotene oxygenase 2
ENSG00000159479.16	38.1	39.03	31.03	28.62	MED8	chr1	protein_coding	mediator complex subunit 8
ENSG00000236753.5	7.96	7.52	8.59	6.88	MKLN1-AS	chr7	processed_transcript	MKLN1 antisense RNA
ENSG00000109113.17	75.96	73.13	53.95	56.78	RAB34	chr17	protein_coding	RAB34, member RAS oncogene family
ENSG00000054654.15	0.66	0.63	0.93	0.74	SYNE2	chr14	protein_coding	spectrin repeat containing, nuclear envelope 2
ENSG00000134996.11	14.74	14.62	14.45	16.19	OSTF1	chr9	protein_coding	osteoclast stimulating factor 1
ENSG00000265982.1	0	0.95	0.4	1.14	RP11-927P21.4	chr17	unprocessed_pseudogene
ENSG00000180773.14	3.87	4.99	6.58	6.53	SLC36A4	chr11	protein_coding	solute carrier family 36 (proton/amino acid symporter), member 4
ENSG00000229893.2	0	0	0.06	0	AC004549.6	chr7	antisense
ENSG00000109339.18	0.01	0	0	0	MAPK10	chr4	protein_coding	mitogen-activated protein kinase 10
ENSG00000262343.1	1.26	0.42	0.23	0.34	RP11-353N14.3	chr17	lincRNA
ENSG00000185386.14	5.18	6.15	2.57	3.5	MAPK11	chr22	protein_coding	mitogen-activated protein kinase 11
ENSG00000118680.12	123.88	163.38	135.86	129.02	MYL12B	chr18	protein_coding	myosin, light chain 12B, regulatory
ENSG00000229344.1	0	0.27	0.17	0.05	RP5-857K21.7	chr1	unprocessed_pseudogene
ENSG00000162753.11	0	0.01	0	0	SLC9C2	chr1	protein_coding	solute carrier family 9, member C2 (putative)
ENSG00000185049.12	11.32	7.26	6.89	8.03	NELFA	chr4	protein_coding	negative elongation factor complex member A
ENSG00000133863.6	0	0	0	0.01	TEX15	chr8	protein_coding	testis expressed 15
ENSG00000229014.3	0	0	0	0.1	RPL30P13	chr12	processed_pseudogene	ribosomal protein L30 pseudogene 13
ENSG00000279686.1	0.54	0.96	0.19	0.07	ECSCR	chr5	protein_coding	endothelial cell surface expressed chemotaxis and apoptosis regulator
ENSG00000140488.14	0	0	0	0.07	CELF6	chr15	protein_coding	CUGBP, Elav-like family member 6
ENSG00000237489.2	0.08	0	0.11	0.01	LINC00959	chr10	lincRNA	long intergenic non-protein coding RNA 959
ENSG00000279649.1	0	0	0.15	0.07	RP11-96D1.8	chr16	TEC
ENSG00000170899.10	1.39	0.88	1.3	0.86	GSTA4	chr6	protein_coding	glutathione S-transferase alpha 4
ENSG00000125734.13	23.72	21.33	19.44	22.11	GPR108	chr19	protein_coding	G protein-coupled receptor 108
ENSG00000144043.11	15.38	14.14	14.25	14.75	TEX261	chr2	protein_coding	testis expressed 261
ENSG00000135775.13	5.51	9.3	9.95	9.03	COG2	chr1	protein_coding	component of oligomeric golgi complex 2
ENSG00000224416.2	0	0	0.27	0	IFNA22P	chr9	unprocessed_pseudogene	interferon, alpha 22, pseudogene
ENSG00000260276.2	0.36	0.22	0.35	0.11	RP11-77H9.2	chr16	antisense
ENSG00000095787.21	10.2	12.78	18.96	18.96	WAC	chr10	protein_coding	WW domain containing adaptor with coiled-coil
ENSG00000277918.1	0.28	0.28	0	0	U1	chr1	snRNA
ENSG00000270681.1	0.04	0.2	0	0.43	RP11-372K14.2	chr4	antisense
ENSG00000256050.2	4.23	5.62	4.98	3.02	RP11-982M15.6	chr14	lincRNA
ENSG00000232353.5	0	0	0.11	0	RP11-655G22.1	chr3	lincRNA
ENSG00000140623.13	0	0.25	0.13	0	SEPT12	chr16	protein_coding	septin 12
ENSG00000100380.12	42.61	50.43	53.52	54.34	ST13	chr22	protein_coding	suppression of tumorigenicity 13 (colon carcinoma) (Hsp70 interacting protein)
ENSG00000224577.1	0	0	0.27	0	LINC01117	chr2	lincRNA	long intergenic non-protein coding RNA 1117
ENSG00000118640.10	36.84	47.11	28.87	30.24	VAMP8	chr2	protein_coding	vesicle-associated membrane protein 8
ENSG00000104714.13	5.43	7.27	6.37	8.12	ERICH1	chr8	protein_coding	glutamate-rich 1
ENSG00000064961.18	105.03	95.61	95.94	93.41	HMG20B	chr19	protein_coding	high mobility group 20B
ENSG00000113070.7	5.45	4.15	3.81	4.24	HBEGF	chr5	protein_coding	heparin-binding EGF-like growth factor
ENSG00000272335.1	1.39	1.14	1.92	0.87	RP11-53O19.3	chr5	lincRNA
ENSG00000101057.15	216.79	183.66	166.83	182.15	MYBL2	chr20	protein_coding	v-myb avian myeloblastosis viral oncogene homolog-like 2
ENSG00000255094.1	0	0	0	0.18	RP11-406D1.2	chr11	lincRNA
ENSG00000160188.9	0.22	0.19	0.08	0.23	RSPH1	chr21	protein_coding	radial spoke head 1 homolog (Chlamydomonas)
ENSG00000269974.1	0.43	0.37	0.26	0.45	RP11-932O9.10	chr15	lincRNA
ENSG00000172009.14	30.56	29.54	23	21.03	THOP1	chr19	protein_coding	thimet oligopeptidase 1
ENSG00000233242.2	0	0	0	0.03	RP11-220I1.2	chr9	antisense
ENSG00000011478.11	14.79	17.39	15.86	19.74	QPCTL	chr19	protein_coding	glutaminyl-peptide cyclotransferase-like
ENSG00000268119.5	0	0	0.06	0	CTD-2561J22.5	chr19	processed_transcript
ENSG00000114656.10	0	0	0.04	0	KIAA1257	chr3	protein_coding	KIAA1257
ENSG00000122420.9	0	0.03	0	0.13	PTGFR	chr1	protein_coding	prostaglandin F receptor (FP)
ENSG00000204228.3	14.14	9.53	6.88	7.71	HSD17B8	chr6	protein_coding	hydroxysteroid (17-beta) dehydrogenase 8
ENSG00000131508.15	24.3	27.74	26.36	25.29	UBE2D2	chr5	protein_coding	ubiquitin-conjugating enzyme E2D 2
ENSG00000260193.1	2.28	1.67	1.4	1.83	RP11-83N9.5	chr9	lincRNA
ENSG00000238825.1	1.68	0	0	0	RNU1-13P	chr1	snRNA	RNA, U1 small nuclear 13, pseudogene
ENSG00000225606.1	0	0	0	0.08	AC005281.2	chr7	antisense
ENSG00000264620.1	0	0	1.14	0	AL139022.1	chr14	miRNA
ENSG00000104164.10	5.72	6.55	10.06	7.7	BLOC1S6	chr15	protein_coding	biogenesis of lysosomal organelles complex-1, subunit 6, pallidin
ENSG00000198189.10	1.78	3	2.26	2.85	HSD17B11	chr4	protein_coding	hydroxysteroid (17-beta) dehydrogenase 11
ENSG00000108821.13	1.59	1.45	1.93	2.08	COL1A1	chr17	protein_coding	collagen, type I, alpha 1
ENSG00000105939.12	8.24	7.38	9.51	10.8	ZC3HAV1	chr7	protein_coding	zinc finger CCCH-type, antiviral 1
ENSG00000105855.9	0.64	0.79	1.37	0.88	ITGB8	chr7	protein_coding	integrin, beta 8
ENSG00000127124.13	1.56	0.76	1.08	0.92	HIVEP3	chr1	protein_coding	human immunodeficiency virus type I enhancer binding protein 3
ENSG00000110844.13	2.98	2.74	2.58	3.15	PRPF40B	chr12	protein_coding	PRP40 pre-mRNA processing factor 40 homolog B (S. cerevisiae)
ENSG00000089723.9	0.82	1.33	0.64	1.03	OTUB2	chr14	protein_coding	OTU deubiquitinase, ubiquitin aldehyde binding 2
ENSG00000249738.6	0	0	0	0.17	AC008697.1	chr5	lincRNA
ENSG00000042493.15	106.18	107.82	89.3	92.16	CAPG	chr2	protein_coding	capping protein (actin filament), gelsolin-like
ENSG00000196417.12	0.17	0.31	0.59	0.41	ZNF765	chr19	protein_coding	zinc finger protein 765
ENSG00000023318.7	7.96	8.03	9.29	9.17	ERP44	chr9	protein_coding	endoplasmic reticulum protein 44
ENSG00000054690.13	0.49	0.48	0.78	0.87	PLEKHH1	chr14	protein_coding	pleckstrin homology domain containing, family H (with MyTH4 domain) member 1
ENSG00000205791.3	0	0.41	0.22	0	LOH12CR2	chr12	lincRNA	loss of heterozygosity, 12, chromosomal region 2 (non-protein coding)
ENSG00000228540.1	0	0	0	0.2	AC073326.3	chr7	sense_intronic
ENSG00000266202.1	1.17	1.1	1.5	0.63	RP1-66C13.4	chr17	protein_coding
ENSG00000174437.16	58.27	54.23	62.19	70.71	ATP2A2	chr12	protein_coding	ATPase, Ca++ transporting, cardiac muscle, slow twitch 2
ENSG00000135900.3	12.86	13.82	10.21	12.37	MRPL44	chr2	protein_coding	mitochondrial ribosomal protein L44
ENSG00000228630.5	4.9	3.84	5.64	5.52	HOTAIR	chr12	antisense	HOX transcript antisense RNA
ENSG00000274012.1	413.5	478.55	311.15	446.17	Metazoa_SRP	chr14	misc_RNA
ENSG00000250903.8	0.08	0.16	0.15	0.18	GMDS-AS1	chr6	lincRNA	GMDS antisense RNA 1 (head to head)
ENSG00000112855.14	22.13	26.44	22.61	23.16	HARS2	chr5	protein_coding	histidyl-tRNA synthetase 2, mitochondrial
ENSG00000272434.1	1.39	0.7	1.27	1.12	RP13-131K19.6	chr3	antisense
ENSG00000249395.2	0.04	0.12	0.26	0.25	CASC9	chr8	lincRNA	cancer susceptibility candidate 9 (non-protein coding)
ENSG00000268400.5	47.86	49.42	29.91	41.64	CTD-3214H19.4	chr19	protein_coding
ENSG00000154518.9	19.31	21.48	14.73	13.83	ATP5G3	chr2	protein_coding	ATP synthase, H+ transporting, mitochondrial Fo complex, subunit C3 (subunit 9)
ENSG00000259985.1	0.27	0	0	0	RP11-549B18.1	chr18	antisense
ENSG00000226200.6	0.01	0.05	0.07	0.05	SGMS1-AS1	chr10	antisense	SGMS1 antisense RNA 1
ENSG00000276234.4	2.43	2.89	4.41	3.39	TADA2A	chr17	protein_coding	transcriptional adaptor 2A
ENSG00000213886.3	0	0.29	0	0.13	UBD	chr6	protein_coding	ubiquitin D
ENSG00000132141.13	0.07	0.02	0.52	0.12	CCT6B	chr17	protein_coding	chaperonin containing TCP1, subunit 6B (zeta 2)
ENSG00000078269.13	4.57	3.72	4.11	5.4	SYNJ2	chr6	protein_coding	synaptojanin 2
ENSG00000141519.14	0.38	0.45	0.34	0.52	CCDC40	chr17	protein_coding	coiled-coil domain containing 40
ENSG00000267980.1	1.46	0	0.41	0.34	AC007292.6	chr19	antisense
ENSG00000187954.12	4.79	4.64	4.14	3.91	CYHR1	chr8	protein_coding	cysteine/histidine-rich 1
ENSG00000244055.1	0.42	0	0.59	0.17	AC007566.10	chr7	antisense
ENSG00000261172.1	0.1	0.19	0	0	RP11-356C4.5	chr16	lincRNA
ENSG00000214856.11	0	0.2	0.32	0.02	KRT16P1	chr17	transcribed_unprocessed_pseudogene	entry withdrawn
ENSG00000068912.13	12.7	14.84	16.94	17.23	ERLEC1	chr2	protein_coding	endoplasmic reticulum lectin 1
ENSG00000267213.4	0	0.05	0.12	1.13	AC007773.2	chr19	antisense
ENSG00000202031.1	0	0	2.17	0	SNORD38A	chr1	snoRNA	small nucleolar RNA, C/D box 38A
ENSG00000124067.16	9.54	8.54	7.45	8	SLC12A4	chr16	protein_coding	solute carrier family 12 (potassium/chloride transporter), member 4
ENSG00000274717.1	0	0	0	0.18	RP1-47A17.1	chr22	processed_pseudogene
ENSG00000164904.15	10.52	12.48	12.71	12.18	ALDH7A1	chr5	protein_coding	aldehyde dehydrogenase 7 family, member A1
ENSG00000114439.18	3.89	5.32	8.13	5.95	BBX	chr3	protein_coding	bobby sox homolog (Drosophila)
ENSG00000087087.18	70.65	59.47	48.8	54.72	SRRT	chr7	protein_coding	serrate, RNA effector molecule
ENSG00000249855.1	1.25	0.63	0.99	0.18	EEF1A1P19	chr5	processed_pseudogene	eukaryotic translation elongation factor 1 alpha 1 pseudogene 19
ENSG00000198520.10	0.3	0	0.31	0.22	C1orf228	chr1	protein_coding	chromosome 1 open reading frame 228
ENSG00000101365.20	37.54	42.75	29.94	29.04	IDH3B	chr20	protein_coding	isocitrate dehydrogenase 3 (NAD+) beta
ENSG00000258881.6	4.18	2.92	2.37	2.35	AC007040.11	chr2	protein_coding
ENSG00000134824.13	12.22	10.6	9.06	10.27	FADS2	chr11	protein_coding	fatty acid desaturase 2
ENSG00000275894.1	0	0.19	0.86	0.67	RP3-453C12.14	chr20	sense_intronic
ENSG00000179044.15	0	0.09	0	0	EXOC3L1	chr16	protein_coding	exocyst complex component 3-like 1
ENSG00000201675.1	1.08	2.71	1.36	0	SNORD32A	chr19	snoRNA	small nucleolar RNA, C/D box 32A
ENSG00000135838.13	0.13	0.33	0.13	0.2	NPL	chr1	protein_coding	N-acetylneuraminate pyruvate lyase (dihydrodipicolinate synthase)
ENSG00000100612.13	9.13	9.5	7.74	7.7	DHRS7	chr14	protein_coding	dehydrogenase/reductase (SDR family) member 7
ENSG00000251093.1	0	0	0.19	0.06	RP11-414H23.3	chr5	lincRNA
ENSG00000127419.16	3.49	3.21	2.28	2.14	TMEM175	chr4	protein_coding	transmembrane protein 175
ENSG00000204176.13	0.07	0.05	0.23	0.15	SYT15	chr10	protein_coding	synaptotagmin XV
ENSG00000227028.6	0	0	0.05	0	SLC8A1-AS1	chr2	antisense	SLC8A1 antisense RNA 1
ENSG00000164934.13	12.62	17.21	16.68	16.93	DCAF13	chr8	protein_coding	DDB1 and CUL4 associated factor 13
ENSG00000183474.15	1.89	2.12	3.04	3.27	GTF2H2C	chr5	protein_coding	GTF2H2 family member C
ENSG00000116750.13	8.49	9.69	11.28	10.7	UCHL5	chr1	protein_coding	ubiquitin carboxyl-terminal hydrolase L5
ENSG00000246640.1	1.32	0.4	0.32	0.39	RP11-1094H24.4	chr17	lincRNA
ENSG00000160075.11	14.13	16.79	10.67	11.7	SSU72	chr1	protein_coding	SSU72 RNA polymerase II CTD phosphatase homolog (S. cerevisiae)
ENSG00000279610.1	0	0.09	0	0.15	C20orf181	chr20	TEC	chromosome 20 open reading frame 181
ENSG00000165475.13	2	2.33	1.82	1.13	CRYL1	chr13	protein_coding	crystallin, lambda 1
ENSG00000278769.1	0.22	0.06	0.14	0	CTD-2036P10.5	chr15	antisense
ENSG00000112077.15	0.14	0	0	0.04	RHAG	chr6	protein_coding	Rh-associated glycoprotein
ENSG00000126453.9	18.51	19.71	13.93	15.38	BCL2L12	chr19	protein_coding	BCL2-like 12 (proline rich)
ENSG00000188428.16	4.74	4.77	7.78	5.75	BLOC1S5	chr6	protein_coding	biogenesis of lysosomal organelles complex-1, subunit 5, muted
ENSG00000162522.10	27.81	19.47	21.83	27.88	KIAA1522	chr1	protein_coding	KIAA1522
ENSG00000279088.1	2.64	1.59	7.08	2.75	RP11-574K11.24	chr10	TEC
ENSG00000066697.14	19.41	20.5	23.58	18.55	MSANTD3	chr9	protein_coding	Myb/SANT-like DNA-binding domain containing 3
ENSG00000257642.1	0.25	0.42	0.35	0.73	RP11-474B16.1	chr12	antisense
ENSG00000139517.7	0.9	1.76	1.92	2.39	LNX2	chr13	protein_coding	ligand of numb-protein X 2
ENSG00000165240.17	1.47	2.04	4.51	3.89	ATP7A	chrX	protein_coding	ATPase, Cu++ transporting, alpha polypeptide
ENSG00000131149.17	13.3	9.07	10.93	12.61	GSE1	chr16	protein_coding	Gse1 coiled-coil protein
ENSG00000223711.1	0.78	0.39	0.61	0	AC091633.3	chr3	antisense
ENSG00000183735.9	4.56	9.59	12	10.52	TBK1	chr12	protein_coding	TANK-binding kinase 1
ENSG00000205143.2	0	0.19	0	0.03	ARID3C	chr9	protein_coding	AT rich interactive domain 3C (BRIGHT-like)
ENSG00000100626.16	0	0.01	0.1	0.01	GALNT16	chr14	protein_coding	polypeptide N-acetylgalactosaminyltransferase 16
ENSG00000116580.18	5.88	5.33	6.75	7.76	GON4L	chr1	protein_coding	gon-4-like (C. elegans)
ENSG00000116161.17	37.36	44.71	47.86	42.56	CACYBP	chr1	protein_coding	calcyclin binding protein
ENSG00000150551.10	0.51	1.27	0.42	0.43	LYPD1	chr2	protein_coding	LY6/PLAUR domain containing 1
ENSG00000171533.11	0.06	0.12	0	0	MAP6	chr11	protein_coding	microtubule-associated protein 6
ENSG00000133858.15	1.77	2.71	5.87	3.93	ZFC3H1	chr12	protein_coding	zinc finger, C3H1-type containing
ENSG00000233872.1	0	0	0.09	0	AC005033.6	chr2	processed_pseudogene
ENSG00000160229.11	0.36	0.44	0.46	0.36	ZNF66	chr19	protein_coding	zinc finger protein 66
ENSG00000227536.1	0	0.23	0	0.02	SOCS5P4	chrX	processed_pseudogene	suppressor of cytokine signaling 5 pseudogene 4
ENSG00000116171.16	4.25	4.96	5.37	5.32	SCP2	chr1	protein_coding	sterol carrier protein 2
ENSG00000232453.5	1.98	3.69	1.89	1.75	RP4-794H19.1	chr1	lincRNA
ENSG00000105136.19	1.93	1.63	1.99	1.56	ZNF419	chr19	protein_coding	zinc finger protein 419
ENSG00000004455.16	94.16	101.79	92.2	82.59	AK2	chr1	protein_coding	adenylate kinase 2
ENSG00000254852.8	0.03	0	0	0.03	NPIPA2	chr16	protein_coding	nuclear pore complex interacting protein family, member A2
ENSG00000177732.7	7.07	6.05	5.6	6.53	SOX12	chr20	protein_coding	SRY (sex determining region Y)-box 12
ENSG00000228327.2	2.48	0.48	1.33	1	RP11-206L10.2	chr1	lincRNA
ENSG00000161653.10	1	1.44	0.59	0.38	NAGS	chr17	protein_coding	N-acetylglutamate synthase
ENSG00000174125.7	0.08	0.02	0.03	0.05	TLR1	chr4	protein_coding	toll-like receptor 1
ENSG00000159247.12	0	0	0	0.03	TUBBP5	chr9	transcribed_unprocessed_pseudogene	tubulin, beta pseudogene 5
ENSG00000259933.6	0	0	0.15	0.07	RP11-304L19.1	chr16	sense_overlapping
ENSG00000116497.17	4.9	5.68	7.43	7.3	S100PBP	chr1	protein_coding	S100P binding protein
ENSG00000117174.10	3.9	4.5	7.06	6.68	ZNHIT6	chr1	protein_coding	zinc finger, HIT-type containing 6
ENSG00000166164.15	8.41	8.45	10.1	10.8	BRD7	chr16	protein_coding	bromodomain containing 7
ENSG00000260339.1	0	0.05	0.07	0.04	HEXA-AS1	chr15	antisense	HEXA antisense RNA 1
ENSG00000116525.13	3.52	2.16	1.63	2.78	TRIM62	chr1	protein_coding	tripartite motif containing 62
ENSG00000187867.8	0.14	0.04	0	0.15	PALM3	chr19	protein_coding	paralemmin 3
ENSG00000141524.15	8.23	6	4.6	6.26	TMC6	chr17	protein_coding	transmembrane channel-like 6
ENSG00000166317.11	0.31	0.05	0.11	0.16	SYNPO2L	chr10	protein_coding	synaptopodin 2-like
ENSG00000184481.16	6.74	4.36	5.35	6.99	FOXO4	chrX	protein_coding	forkhead box O4
ENSG00000166407.13	2.14	1.74	1.75	2.09	LMO1	chr11	protein_coding	LIM domain only 1 (rhombotin 1)
ENSG00000160716.4	0	0	0	0.01	CHRNB2	chr1	protein_coding	cholinergic receptor, nicotinic, beta 2 (neuronal)
ENSG00000228140.1	0	0.09	0.03	0	RP3-467K16.4	chr1	lincRNA
ENSG00000183506.16	1.19	1.53	1.26	1.28	PI4KAP2	chr22	transcribed_unprocessed_pseudogene	phosphatidylinositol 4-kinase, catalytic, alpha pseudogene 2
ENSG00000239257.1	0	0.97	0.81	0.23	RPL23AP1	chr6	transcribed_processed_pseudogene	ribosomal protein L23a pseudogene 1
ENSG00000169740.13	1.59	1.2	1.85	1.07	ZNF32	chr10	protein_coding	zinc finger protein 32
ENSG00000148834.12	124.67	146.17	99.26	94.31	GSTO1	chr10	protein_coding	glutathione S-transferase omega 1
ENSG00000278931.1	0.16	0.08	0.02	0.17	bP-2189O9.2	chr21	unprocessed_pseudogene
ENSG00000183671.12	0.92	1.43	1.78	1.83	GPR1	chr2	protein_coding	G protein-coupled receptor 1
ENSG00000164037.16	0	0	0.02	0.02	SLC9B1	chr4	protein_coding	solute carrier family 9, subfamily B (NHA1, cation proton antiporter 1), member 1
ENSG00000260805.2	0.17	0.26	0.4	0.17	RP11-61J19.5	chr1	lincRNA
ENSG00000162923.14	15.26	14.47	21.81	21.45	WDR26	chr1	protein_coding	WD repeat domain 26
ENSG00000170848.15	1.71	1.9	1.44	1.2	PSG6	chr19	protein_coding	pregnancy specific beta-1-glycoprotein 6
ENSG00000197599.12	0.12	0.09	0.01	0.2	CCDC154	chr16	protein_coding	coiled-coil domain containing 154
ENSG00000023191.16	63.96	59.14	48.74	49.63	RNH1	chr11	protein_coding	ribonuclease/angiogenin inhibitor 1
ENSG00000167685.14	7.96	9.66	6.97	7.11	ZNF444	chr19	protein_coding	zinc finger protein 444
ENSG00000278665.1	0.06	0	0.72	0.59	RP11-666O2.4	chr16	unprocessed_pseudogene
ENSG00000180574.3	0.02	0	0	0.02	EIF2S3L	chr12	protein_coding
ENSG00000255326.1	0.07	0	0	0.11	CTD-2530H12.4	chr11	antisense
ENSG00000254635.5	6.32	7.43	7.65	6.99	WAC-AS1	chr10	antisense	WAC antisense RNA 1 (head to head)
ENSG00000130725.7	60.75	70.74	49.38	54.89	UBE2M	chr19	protein_coding	ubiquitin-conjugating enzyme E2M
ENSG00000258694.1	0	0	0.11	0	RP11-1033H12.1	chr14	lincRNA
ENSG00000203950.6	16.64	22.58	12.6	17.67	FAM127B	chrX	protein_coding	family with sequence similarity 127, member B
ENSG00000213830.3	0.9	1.27	0.76	1.45	CFL1P5	chr5	processed_pseudogene	cofilin 1 (non-muscle) pseudogene 5
ENSG00000205362.10	0	0.44	0	0	MT1A	chr16	protein_coding	metallothionein 1A
ENSG00000123364.4	10.08	10.89	11.4	12.58	HOXC13	chr12	protein_coding	homeobox C13
ENSG00000254002.1	0	0.1	0	0.08	RP11-213G6.2	chr8	lincRNA
ENSG00000090432.6	14.74	15.07	11.36	12.44	MUL1	chr1	protein_coding	mitochondrial E3 ubiquitin protein ligase 1
ENSG00000272667.1	2.16	1.59	2.72	2.38	RP11-395A13.2	chr2	lincRNA
ENSG00000244252.1	0	0	1.31	0.66	RP11-495P10.7	chr1	lincRNA
ENSG00000090316.15	14.82	13.13	15.66	15.27	MAEA	chr4	protein_coding	macrophage erythroblast attacher
ENSG00000237412.6	0	0.23	0.02	0.07	PRSS56	chr2	protein_coding	protease, serine, 56
ENSG00000125652.7	18.65	16.48	14.33	14	ALKBH7	chr19	protein_coding	alkB, alkylation repair homolog 7 (E. coli)
ENSG00000166337.9	62.27	69.23	48.58	41.59	TAF10	chr11	protein_coding	TAF10 RNA polymerase II, TATA box binding protein (TBP)-associated factor, 30kDa
ENSG00000223813.2	0.22	0.06	0.26	1.01	AC007255.8	chr7	antisense
ENSG00000166669.13	0.5	0.43	0.82	0.51	ATF7IP2	chr16	protein_coding	activating transcription factor 7 interacting protein 2
ENSG00000154124.4	9.91	12.82	13.88	14.86	OTULIN	chr5	protein_coding	OTU deubiquitinase with linear linkage specificity
ENSG00000264672.5	0	0.1	0	0.16	SEPT4-AS1	chr17	antisense	SEPT4 antisense RNA 1
ENSG00000174928.15	1.35	1.86	1.78	1.03	C3orf33	chr3	protein_coding	chromosome 3 open reading frame 33
ENSG00000197355.10	19	16.08	13.72	16.24	UAP1L1	chr9	protein_coding	UDP-N-acetylglucosamine pyrophosphorylase 1 like 1
ENSG00000163399.15	167.08	140.02	156.17	176.97	ATP1A1	chr1	protein_coding	ATPase, Na+/K+ transporting, alpha 1 polypeptide
ENSG00000267723.1	0	0.29	0.06	0	CTD-2189E23.1	chr19	lincRNA
ENSG00000171657.5	0	0.07	0	0	GPR82	chrX	protein_coding	G protein-coupled receptor 82
ENSG00000170469.10	3.97	7.16	4.14	2.74	SPATA24	chr5	protein_coding	spermatogenesis associated 24
ENSG00000232938.2	0.32	0.12	0.12	0.15	RPL23AP87	chr17	transcribed_processed_pseudogene	ribosomal protein L23a pseudogene 87
ENSG00000119681.11	2.28	1.75	1.7	1.99	LTBP2	chr14	protein_coding	latent transforming growth factor beta binding protein 2
ENSG00000198730.7	12.27	15.43	19.38	18.75	CTR9	chr11	protein_coding	CTR9, Paf1/RNA polymerase II complex component
ENSG00000259939.1	0	0	1.02	0.62	RP11-77H9.5	chr16	antisense
ENSG00000259431.5	1.34	1.63	1.05	1.8	THTPA	chr14	protein_coding	thiamine triphosphatase
ENSG00000196152.10	3.56	4.42	3.57	3.65	ZNF79	chr9	protein_coding	zinc finger protein 79
ENSG00000154328.15	7.75	8.34	7.02	6.64	NEIL2	chr8	protein_coding	nei endonuclease VIII-like 2 (E. coli)
ENSG00000173085.13	7.51	7.52	7.62	6.09	COQ2	chr4	protein_coding	coenzyme Q2 4-hydroxybenzoate polyprenyltransferase
ENSG00000145416.13	0	0	0.08	0.02	2019-03-01	chr4	protein_coding	membrane-associated ring finger (C3HC4) 1, E3 ubiquitin protein ligase
ENSG00000135314.12	0.53	0.44	0.96	0.55	KHDC1	chr6	protein_coding	KH homology domain containing 1
ENSG00000177125.5	1.24	1.81	3.09	2.56	ZBTB34	chr9	protein_coding	zinc finger and BTB domain containing 34
ENSG00000123179.13	16.76	21.13	10.93	13.05	EBPL	chr13	protein_coding	emopamil binding protein-like
ENSG00000263006.6	0	0.09	0.09	0	ROCK1P1	chr18	transcribed_unprocessed_pseudogene	Rho-associated, coiled-coil containing protein kinase 1 pseudogene 1
ENSG00000088854.12	0.94	0.84	1.28	1.29	C20orf194	chr20	protein_coding	chromosome 20 open reading frame 194
ENSG00000112715.20	32.55	27.76	33.74	34.55	VEGFA	chr6	protein_coding	vascular endothelial growth factor A
ENSG00000242687.2	0.31	0.16	0.1	0.1	AC004893.11	chr7	antisense
ENSG00000274897.2	0.67	0	0.05	0.17	PANO1	chr11	protein_coding	proapoptotic nucleolar protein 1
ENSG00000049541.10	55.99	74.64	47.79	43.53	RFC2	chr7	protein_coding	replication factor C (activator 1) 2, 40kDa
ENSG00000280355.1	0.36	0.49	1.09	1.02	RP11-119F19.5	chr10	TEC
ENSG00000236719.2	0.12	0	0	0	OVAAL	chr1	lincRNA	ovarian adenocarcinoma amplified long non-coding RNA
ENSG00000113966.9	0.82	0.49	1.6	1.46	ARL6	chr3	protein_coding	ADP-ribosylation factor-like 6
ENSG00000259976.1	0.67	0.79	0.48	0.39	RP11-553L6.5	chr3	lincRNA
ENSG00000218418.2	0	0	0.01	0	RP11-296E7.1	chr6	processed_pseudogene
ENSG00000221953.5	0	0.02	0.08	0.03	C1orf229	chr1	lincRNA	chromosome 1 open reading frame 229
ENSG00000167332.7	0	0.03	0	0	OR51E2	chr11	protein_coding	olfactory receptor, family 51, subfamily E, member 2
ENSG00000186615.10	0.47	0.7	1.22	1.04	KTN1-AS1	chr14	antisense	KTN1 antisense RNA 1
ENSG00000088367.20	14.41	9.4	10.9	13.47	EPB41L1	chr20	protein_coding	erythrocyte membrane protein band 4.1-like 1
ENSG00000167945.1	0	0.11	0	0	PRR25	chr16	protein_coding	proline rich 25
ENSG00000162928.8	1.69	2.89	3.78	3.34	PEX13	chr2	protein_coding	peroxisomal biogenesis factor 13
ENSG00000197043.13	70.74	79.92	62.34	59.63	ANXA6	chr5	protein_coding	annexin A6
ENSG00000125449.6	2.9	3.23	2.57	3.3	ARMC7	chr17	protein_coding	armadillo repeat containing 7
ENSG00000155980.11	0.03	0	0.02	0.02	KIF5A	chr12	protein_coding	kinesin family member 5A
ENSG00000086758.15	32.06	23.94	23.78	30.96	HUWE1	chrX	protein_coding	HECT, UBA and WWE domain containing 1, E3 ubiquitin protein ligase
ENSG00000204839.8	8.69	7.96	8.56	7.63	MROH6	chr8	protein_coding	maestro heat-like repeat family member 6
ENSG00000266667.1	0.17	0	0	0	RP11-849N15.4	chr17	lincRNA
ENSG00000268043.7	1.05	1.55	2.11	1.84	NBPF12	chr1	protein_coding	neuroblastoma breakpoint family, member 12
ENSG00000201558.1	0	0.83	1.16	0.89	RNVU1-6	chr1	snRNA	RNA, variant U1 small nuclear 6
ENSG00000236700.5	0	0	0.13	0.07	LINC01010	chr6	lincRNA	long intergenic non-protein coding RNA 1010
ENSG00000271659.1	0	0	0.16	0	RP11-435O5.4	chr9	antisense
ENSG00000258490.1	0	0	0.07	0	RP11-862P13.1	chr14	antisense
ENSG00000172922.8	23.11	20.1	18.48	18.48	RNASEH2C	chr11	protein_coding	ribonuclease H2, subunit C
ENSG00000137801.10	36.28	32.45	36.15	36.07	THBS1	chr15	protein_coding	thrombospondin 1
ENSG00000217648.1	0.16	0.48	0.43	0.35	RP1-95L4.4	chr6	processed_pseudogene
ENSG00000271105.1	0	0	0.42	0	SCML2P2	chr16	processed_pseudogene	SCML2 pseudogene 2
ENSG00000173706.12	7.77	5.34	6.12	8.05	HEG1	chr3	protein_coding	heart development protein with EGF-like domains 1
ENSG00000115425.13	0.83	0.05	0.74	0.41	PECR	chr2	protein_coding	peroxisomal trans-2-enoyl-CoA reductase
ENSG00000049449.8	51.36	54.09	67.24	64.91	RCN1	chr11	protein_coding	reticulocalbin 1, EF-hand calcium binding domain
ENSG00000269038.1	0	0	0.17	0	AP001462.6	chr11	lincRNA
ENSG00000224799.1	0	0.5	0	0	RP11-445O16.3	chrX	antisense
ENSG00000166825.13	104.05	78.76	59.9	75.65	ANPEP	chr15	protein_coding	alanyl (membrane) aminopeptidase
ENSG00000110696.9	50.02	65.99	60.41	60.08	C11orf58	chr11	protein_coding	chromosome 11 open reading frame 58
ENSG00000180769.8	0.01	0.09	0	0.02	WDFY3-AS2	chr4	processed_transcript	WDFY3 antisense RNA 2
ENSG00000271447.5	0.07	0.15	0	0.22	MMP28	chr17	protein_coding	matrix metallopeptidase 28
ENSG00000066379.14	48.82	58.31	41.97	36.43	ZNRD1	chr6	protein_coding	zinc ribbon domain containing 1
ENSG00000164509.13	0.01	0.36	0.23	0.3	IL31RA	chr5	protein_coding	interleukin 31 receptor A
ENSG00000153187.16	131.73	147.26	141.43	148.45	HNRNPU	chr1	protein_coding	heterogeneous nuclear ribonucleoprotein U (scaffold attachment factor A)
ENSG00000278615.4	15.58	18.67	15.79	12.5	C11orf98	chr11	protein_coding	chromosome 11 open reading frame 98
ENSG00000103415.11	31.35	36.51	24.54	23.9	HMOX2	chr16	protein_coding	heme oxygenase 2
ENSG00000162174.12	6.23	6.43	5.72	5.38	ASRGL1	chr11	protein_coding	asparaginase like 1
ENSG00000143595.12	0.02	0	0	0	AQP10	chr1	protein_coding	aquaporin 10
ENSG00000279539.1	0.39	0	0	0.08	AC006486.10	chr19	TEC
ENSG00000012504.13	0	0	0	0.06	NR1H4	chr12	protein_coding	nuclear receptor subfamily 1, group H, member 4
ENSG00000243284.1	0.17	0	0	0	VSIG8	chr1	protein_coding	V-set and immunoglobulin domain containing 8
ENSG00000253768.1	0.2	0	0.17	0	CTB-33O18.1	chr5	lincRNA
ENSG00000213949.8	2.14	3.41	5.12	3.95	ITGA1	chr5	protein_coding	integrin, alpha 1
ENSG00000213742.6	0.25	0.15	0.37	0.21	ZNF337-AS1	chr20	antisense	ZNF337 antisense RNA 1
ENSG00000203814.6	1	0.79	0.55	1.25	HIST2H2BF	chr1	protein_coding	histone cluster 2, H2bf
ENSG00000070808.15	0.03	0.04	0.11	0.07	CAMK2A	chr5	protein_coding	calcium/calmodulin-dependent protein kinase II alpha
ENSG00000276390.1	0.26	2.82	0.29	0.49	RP1-197B17.5	chr12	sense_intronic
ENSG00000267547.1	0	0	0.5	0.14	RP11-686D22.4	chr17	lincRNA
ENSG00000159063.12	41.76	47.34	54.99	46.46	ALG8	chr11	protein_coding	ALG8, alpha-1,3-glucosyltransferase
ENSG00000267309.1	0.94	0.59	1.2	0.84	CTD-2630F21.1	chr19	antisense
ENSG00000130653.15	0.41	0.13	0.26	0.56	PNPLA7	chr9	protein_coding	patatin-like phospholipase domain containing 7
ENSG00000251868.1	0	0	0.63	0	RNU7-71P	chr16	snRNA	RNA, U7 small nuclear 71 pseudogene
ENSG00000148468.16	2.18	2.39	2.73	3.43	FAM171A1	chr10	protein_coding	family with sequence similarity 171, member A1
ENSG00000120451.10	8.23	6.68	7.47	7.96	SNX19	chr11	protein_coding	sorting nexin 19
ENSG00000168813.16	0.75	2.05	3.82	2.48	ZNF507	chr19	protein_coding	zinc finger protein 507
ENSG00000170836.11	2.48	4.12	5.83	4.51	PPM1D	chr17	protein_coding	protein phosphatase, Mg2+/Mn2+ dependent, 1D
ENSG00000162458.12	12.42	10.72	7.9	9.18	FBLIM1	chr1	protein_coding	filamin binding LIM protein 1
ENSG00000274667.1	0	0.13	1.4	0.21	RP11-31H5.3	chr15	sense_intronic
ENSG00000182118.5	0.76	0.64	0.76	0.85	FAM89A	chr1	protein_coding	family with sequence similarity 89, member A
ENSG00000277738.1	0	0	0	0.05	RP11-693J15.6	chr12	lincRNA
ENSG00000164442.9	29.51	26.83	28.99	28.09	CITED2	chr6	protein_coding	Cbp/p300-interacting transactivator, with Glu/Asp-rich carboxy-terminal domain, 2
ENSG00000100129.17	44.98	49.28	47.62	47.41	EIF3L	chr22	protein_coding	eukaryotic translation initiation factor 3, subunit L
ENSG00000268858.2	6.09	3.64	4.43	3.96	RP4-591C20.9	chr20	antisense
ENSG00000135090.13	2.28	2.9	3.94	5.4	TAOK3	chr12	protein_coding	TAO kinase 3
ENSG00000065183.15	8.89	12.72	13.61	12	WDR3	chr1	protein_coding	WD repeat domain 3
ENSG00000167862.9	51.62	52.35	28.69	31.01	ICT1	chr17	protein_coding	immature colon carcinoma transcript 1
ENSG00000220988.1	0	0.5	0.84	0.8	SNORD88C	chr19	snoRNA	small nucleolar RNA, C/D box 88C
ENSG00000026103.19	1.92	2.26	5.52	4.35	FAS	chr10	protein_coding	Fas cell surface death receptor
ENSG00000122861.15	3.02	2.75	1.6	1.7	PLAU	chr10	protein_coding	plasminogen activator, urokinase
ENSG00000167280.16	7.15	7.09	6.83	5.38	ENGASE	chr17	protein_coding	endo-beta-N-acetylglucosaminidase
ENSG00000136630.12	7.37	5.68	4.96	5.51	HLX	chr1	protein_coding	H2.0-like homeobox
ENSG00000184292.6	3.51	2.83	4.19	4.15	TACSTD2	chr1	protein_coding	tumor-associated calcium signal transducer 2
ENSG00000267222.1	0	0	0.06	0	RP11-194N12.2	chr17	sense_intronic
ENSG00000072506.12	165.46	186.64	119.59	125.24	HSD17B10	chrX	protein_coding	hydroxysteroid (17-beta) dehydrogenase 10
ENSG00000272990.1	0.45	0.45	1.72	0	RP11-305K5.1	chr3	antisense
ENSG00000223714.1	0.54	0.44	0.09	0	RP5-1172N10.2	chrX	lincRNA
ENSG00000234694.1	0.21	0.28	0.52	0.66	RP1-92O14.3	chr1	antisense
ENSG00000187796.13	0.58	0.47	0.32	0.58	CARD9	chr9	protein_coding	caspase recruitment domain family, member 9
ENSG00000078070.11	6	5.68	5.31	8.55	MCCC1	chr3	protein_coding	methylcrotonoyl-CoA carboxylase 1 (alpha)
ENSG00000183044.11	0.01	0	0.03	0.08	ABAT	chr16	protein_coding	4-aminobutyrate aminotransferase
ENSG00000225171.2	0	0	0.33	0.4	DUTP6	chr1	processed_pseudogene	deoxyuridine triphosphatase pseudogene 6
ENSG00000231307.1	0	0	0.27	0	RPS3P2	chr20	processed_pseudogene	ribosomal protein S3 pseudogene 2
ENSG00000228404.1	0	0	0.61	0	AP001468.58	chr21	antisense
ENSG00000163807.5	4.2	7.3	7.07	8.3	KIAA1143	chr3	protein_coding	KIAA1143
ENSG00000180628.14	1.53	1.98	2.24	2.16	PCGF5	chr10	protein_coding	polycomb group ring finger 5
ENSG00000119866.20	0.02	0.04	0.02	0.02	BCL11A	chr2	protein_coding	B-cell CLL/lymphoma 11A (zinc finger protein)
ENSG00000204519.10	1.09	1.3	1	0.75	ZNF551	chr19	protein_coding	zinc finger protein 551
ENSG00000145491.11	1.09	0.93	1.18	0.26	ROPN1L	chr5	protein_coding	rhophilin associated tail protein 1-like
ENSG00000255071.3	0.06	0.12	0	0.29	SAA2-SAA4	chr11	protein_coding	SAA2-SAA4 readthrough
ENSG00000146409.10	3.6	2.35	3.39	3.15	SLC18B1	chr6	protein_coding	solute carrier family 18, subfamily B, member 1
ENSG00000225945.1	0.11	0.11	0	0	RP3-441A12.1	chr6	antisense
ENSG00000151239.13	27.94	41.98	52.87	39.87	TWF1	chr12	protein_coding	twinfilin actin binding protein 1
ENSG00000088002.11	0.16	0.46	0.18	0.24	SULT2B1	chr19	protein_coding	sulfotransferase family, cytosolic, 2B, member 1
ENSG00000185262.8	20.55	19.21	18.32	17.94	UBALD2	chr17	protein_coding	UBA-like domain containing 2
ENSG00000280037.1	0	0	0	0.14	RP11-434P11.1	chr2	TEC
ENSG00000230383.1	0.05	0	0.18	0.25	AC009245.3	chr7	processed_pseudogene
ENSG00000205707.10	2.26	0.96	1.92	1.75	LYRM5	chr12	protein_coding	LYR motif containing 5
ENSG00000264364.2	12.14	11.35	10.36	12.03	DYNLL2	chr17	protein_coding	dynein, light chain, LC8-type 2
ENSG00000184194.5	0.18	0.22	0.22	0.15	GPR173	chrX	protein_coding	G protein-coupled receptor 173
ENSG00000266306.1	0	0.16	0.18	0.1	CTD-2008P7.6	chr17	unprocessed_pseudogene
ENSG00000068745.14	14.33	16.8	15.43	16.73	IP6K2	chr3	protein_coding	inositol hexakisphosphate kinase 2
ENSG00000169660.15	0.99	1.52	0.98	1.25	HEXDC	chr17	protein_coding	hexosaminidase (glycosyl hydrolase family 20, catalytic domain) containing
ENSG00000138160.5	7.13	10.59	12.65	10.28	KIF11	chr10	protein_coding	kinesin family member 11
ENSG00000166225.8	1.27	1.5	4.91	3.15	FRS2	chr12	protein_coding	fibroblast growth factor receptor substrate 2
ENSG00000272764.1	0.16	0	0.14	0.66	RP11-318E3.9	chr10	lincRNA
ENSG00000143228.12	10.39	12.01	14.75	14.53	NUF2	chr1	protein_coding	NUF2, NDC80 kinetochore complex component
ENSG00000105447.12	10.82	13.04	10.34	8.85	GRWD1	chr19	protein_coding	glutamate-rich WD repeat containing 1
ENSG00000196498.13	70.44	43.12	36.73	47.52	NCOR2	chr12	protein_coding	nuclear receptor corepressor 2
ENSG00000279537.1	0	0	0	0.04	RP11-133K1.8	chr15	TEC
ENSG00000095209.11	3.41	3.97	4.26	3.23	TMEM38B	chr9	protein_coding	transmembrane protein 38B
ENSG00000166797.10	25.01	28.49	24.66	25.81	FAM96A	chr15	protein_coding	family with sequence similarity 96, member A
ENSG00000272076.1	0.95	0	0	0	RP11-11C20.3	chr8	lincRNA
ENSG00000277491.1	0.46	0.47	0	0	RP11-676J12.9	chr17	lincRNA
ENSG00000079435.9	1.6	1.36	1.11	2.14	LIPE	chr19	protein_coding	lipase, hormone-sensitive
ENSG00000144959.9	7.79	10.92	12.78	12.21	NCEH1	chr3	protein_coding	neutral cholesterol ester hydrolase 1
ENSG00000274589.1	0	0	0.12	0	Metazoa_SRP	chr11	misc_RNA
ENSG00000243251.5	3.07	3.38	5.68	4.46	PGBD3	chr10	protein_coding	piggyBac transposable element derived 3
ENSG00000182013.17	0	0	0.05	0	PNMAL1	chr19	protein_coding	paraneoplastic Ma antigen family-like 1
ENSG00000169962.4	1.12	0.77	1	1.22	TAS1R3	chr1	protein_coding	taste receptor, type 1, member 3
ENSG00000261428.2	0	0.21	0.11	0.25	RP11-16P6.1	chr2	antisense
ENSG00000171403.9	0.87	0.46	0.15	0.43	KRT9	chr17	protein_coding	keratin 9, type I
ENSG00000198399.14	1.1	2.07	3.14	2.49	ITSN2	chr2	protein_coding	intersectin 2
ENSG00000163166.13	24.29	31.72	36.34	36.61	IWS1	chr2	protein_coding	IWS1 homolog (S. cerevisiae)
ENSG00000110651.11	61.82	53.84	45.57	52.63	CD81	chr11	protein_coding	CD81 molecule
ENSG00000215045.8	0	0	0.03	0	GRID2IP	chr7	protein_coding	glutamate receptor, ionotropic, delta 2 (Grid2) interacting protein
ENSG00000229950.1	1.5	0.41	0.48	0.49	TFAP2A-AS1	chr6	antisense	TFAP2A antisense RNA 1
ENSG00000257283.1	0	0	0.63	0.81	RP11-1060G2.1	chr12	antisense
ENSG00000203279.3	0	0.17	0.52	0.32	RP11-498P14.5	chr9	lincRNA
ENSG00000164818.15	25.39	21.19	19.59	22.17	DNAAF5	chr7	protein_coding	dynein, axonemal, assembly factor 5
ENSG00000107968.9	0.93	1.65	3.07	2.11	MAP3K8	chr10	protein_coding	mitogen-activated protein kinase kinase kinase 8
ENSG00000012963.13	7.89	10.68	8.51	9.89	UBR7	chr14	protein_coding	ubiquitin protein ligase E3 component n-recognin 7 (putative)
ENSG00000158470.5	17.28	16.14	19.53	22.99	B4GALT5	chr20	protein_coding	UDP-Gal:betaGlcNAc beta 1,4- galactosyltransferase, polypeptide 5
ENSG00000235010.1	0.06	0	0	0	RP11-140A10.3	chr10	antisense
ENSG00000226237.1	0	0.05	0	0.05	RP11-276H19.1	chr9	lincRNA
ENSG00000276110.1	0	0.06	0	0	RP4-790G17.7	chr1	antisense
ENSG00000254962.1	0	0	0	0.08	OR4A14P	chr11	unprocessed_pseudogene	olfactory receptor, family 4, subfamily A, member 14 pseudogene
ENSG00000143742.12	93.68	127.8	134.38	121.09	SRP9	chr1	protein_coding	signal recognition particle 9kDa
ENSG00000204388.6	111.51	94.56	110.14	100.58	HSPA1B	chr6	protein_coding	heat shock 70kDa protein 1B
ENSG00000085563.14	0.54	0.47	0.34	0.66	ABCB1	chr7	protein_coding	ATP-binding cassette, sub-family B (MDR/TAP), member 1
ENSG00000197928.10	0.04	0	0.01	0.03	ZNF677	chr19	protein_coding	zinc finger protein 677
ENSG00000272630.1	0.05	0.05	0.54	0.62	RP11-344N10.5	chr10	lincRNA
ENSG00000131697.17	4.4	3.44	3.33	4.62	NPHP4	chr1	protein_coding	nephronophthisis 4
ENSG00000003137.8	2.48	2.54	2.33	2.6	CYP26B1	chr2	protein_coding	cytochrome P450, family 26, subfamily B, polypeptide 1
ENSG00000171016.11	0.47	0.45	0.58	0.84	PYGO1	chr15	protein_coding	pygopus family PHD finger 1
ENSG00000202111.1	1.02	0.51	0	0	VTRNA1-2	chr5	misc_RNA	vault RNA 1-2
ENSG00000227081.5	15.64	7.87	6.72	7.16	RP11-543P15.1	chr12	processed_pseudogene
ENSG00000231327.1	2.19	0.96	1.09	0.5	AC016700.5	chr2	lincRNA
ENSG00000163347.5	8.66	14.2	18.28	16.14	CLDN1	chr3	protein_coding	claudin 1
ENSG00000173933.19	12.74	15.06	11.19	10.72	RBM4	chr11	protein_coding	RNA binding motif protein 4
ENSG00000172667.10	0.78	1.14	1.81	1.59	ZMAT3	chr3	protein_coding	zinc finger, matrin-type 3
ENSG00000111786.8	147.61	149.94	130.6	136.44	SRSF9	chr12	protein_coding	serine/arginine-rich splicing factor 9
ENSG00000133657.14	5.21	8.38	14.38	10.27	ATP13A3	chr3	protein_coding	ATPase type 13A3
ENSG00000176383.8	0.65	0.5	0.3	0.59	B3GNT4	chr12	protein_coding	UDP-GlcNAc:betaGal beta-1,3-N-acetylglucosaminyltransferase 4
ENSG00000160145.15	0.08	0.11	0.13	0.12	KALRN	chr3	protein_coding	kalirin, RhoGEF kinase
ENSG00000108587.14	4.47	5.12	6.34	6.7	GOSR1	chr17	protein_coding	golgi SNAP receptor complex member 1
ENSG00000213977.7	96.58	91.97	60.23	74.47	TAX1BP3	chr17	protein_coding	Tax1 (human T-cell leukemia virus type I) binding protein 3
ENSG00000128849.10	0	0.08	0.06	0.05	CGNL1	chr15	protein_coding	cingulin-like 1
ENSG00000244300.2	4.76	4.49	3.58	3.24	GATA2-AS1	chr3	antisense	GATA2 antisense RNA 1
ENSG00000145214.13	1.37	1.42	1.03	0.88	DGKQ	chr4	protein_coding	diacylglycerol kinase, theta 110kDa
ENSG00000153048.10	29.09	26.72	23.15	28.45	CARHSP1	chr16	protein_coding	calcium regulated heat stable protein 1, 24kDa
ENSG00000265407.1	0	0.63	0.53	0	MIR4324	chr19	miRNA	microRNA 4324
ENSG00000229556.2	0	0	0.06	0	RP11-363G2.4	chr13	lincRNA
ENSG00000175602.3	51.49	50.83	28.34	31.7	CCDC85B	chr11	protein_coding	coiled-coil domain containing 85B
ENSG00000240758.2	0.55	0.76	1.61	2.7	RP11-155G14.6	chr7	processed_transcript
ENSG00000169118.15	2.32	3.64	5.24	5.22	CSNK1G1	chr15	protein_coding	casein kinase 1, gamma 1
ENSG00000170153.10	0.22	0.14	0.37	0.57	RNF150	chr4	protein_coding	ring finger protein 150
ENSG00000169032.9	31.83	28.25	21.2	23.66	MAP2K1	chr15	protein_coding	mitogen-activated protein kinase kinase 1
ENSG00000110719.9	29.56	23.26	22.89	23.81	TCIRG1	chr11	protein_coding	T-cell, immune regulator 1, ATPase, H+ transporting, lysosomal V0 subunit A3
ENSG00000156802.12	7.5	11.79	13.08	12.09	ATAD2	chr8	protein_coding	ATPase family, AAA domain containing 2
ENSG00000274937.1	0	0	0	0.44	CTD-2311M21.4	chr15	lincRNA
ENSG00000234678.1	4.95	2.88	3.87	5.78	RP11-465N4.4	chr1	antisense
ENSG00000129354.11	19.78	24.6	18	20.7	AP1M2	chr19	protein_coding	adaptor-related protein complex 1, mu 2 subunit
ENSG00000197380.10	0.05	0	0.04	0.04	DACT3	chr19	protein_coding	dishevelled-binding antagonist of beta-catenin 3
ENSG00000135821.16	11.92	14.53	13.61	14.39	GLUL	chr1	protein_coding	glutamate-ammonia ligase
ENSG00000029363.15	7.67	10.01	14.4	10.29	BCLAF1	chr6	protein_coding	BCL2-associated transcription factor 1
ENSG00000132646.10	73.83	98.65	83.61	79.03	PCNA	chr20	protein_coding	proliferating cell nuclear antigen
ENSG00000127022.14	191.04	216.34	265.71	269.13	CANX	chr5	protein_coding	calnexin
ENSG00000162419.12	2.15	3.27	2.48	3.3	GMEB1	chr1	protein_coding	glucocorticoid modulatory element binding protein 1
ENSG00000206417.8	0.4	0.44	0.14	0.57	H1FX-AS1	chr3	antisense	H1FX antisense RNA 1
ENSG00000248208.1	0	0	0	0.1	RP11-153M7.1	chr4	processed_pseudogene
ENSG00000129351.17	58.07	49.43	48.51	55.84	ILF3	chr19	protein_coding	interleukin enhancer binding factor 3, 90kDa
ENSG00000016391.10	0.46	0.32	0.76	0.55	CHDH	chr3	protein_coding	choline dehydrogenase
ENSG00000168778.11	7.97	4.62	6.99	7.49	TCTN2	chr12	protein_coding	tectonic family member 2
ENSG00000243508.1	0	0	0.21	0	RP11-775J23.2	chr3	processed_pseudogene
ENSG00000154845.15	21.86	25.2	28.95	27.96	PPP4R1	chr18	protein_coding	protein phosphatase 4, regulatory subunit 1
ENSG00000163638.13	0.02	0.01	0	0	ADAMTS9	chr3	protein_coding	ADAM metallopeptidase with thrombospondin type 1 motif, 9
ENSG00000163827.12	0.22	0.01	0.1	0.06	LRRC2	chr3	protein_coding	leucine rich repeat containing 2
ENSG00000145391.13	3.99	4.27	7.53	6.48	SETD7	chr4	protein_coding	SET domain containing (lysine methyltransferase) 7
ENSG00000171557.16	0.5	0	0.14	0.17	FGG	chr4	protein_coding	fibrinogen gamma chain
ENSG00000280402.1	0	0	0	0.05	RP11-20I23.10	chr16	TEC
ENSG00000261081.1	0.05	0	0	0	RP11-1H8.1	chr15	unprocessed_pseudogene
ENSG00000101940.17	14.95	14.62	10.62	10.77	WDR13	chrX	protein_coding	WD repeat domain 13
ENSG00000229659.1	3.41	1.35	0.96	0.67	RP11-345K20.2	chr10	processed_pseudogene
ENSG00000254985.1	0.64	0.08	0	0	RSF1-IT2	chr11	sense_intronic	RSF1 intronic transcript 2
ENSG00000139973.15	0	0	0	0.02	SYT16	chr14	protein_coding	synaptotagmin XVI
ENSG00000173727.11	10.65	7.79	11.08	11.77	CMB9-22P13.1	chr11	lincRNA
ENSG00000184319.15	2.51	3.5	2.54	3.15	RPL23AP82	chr22	transcribed_unprocessed_pseudogene	ribosomal protein L23a pseudogene 82
ENSG00000131748.15	16.24	14.59	10.99	16	STARD3	chr17	protein_coding	StAR-related lipid transfer (START) domain containing 3
ENSG00000213923.10	34.96	26.93	24.68	27.66	CSNK1E	chr22	protein_coding	casein kinase 1, epsilon
ENSG00000246985.7	0.28	0.42	0.4	0.32	SOCS2-AS1	chr12	processed_transcript	SOCS2 antisense RNA 1
ENSG00000218426.5	3.14	2.45	2.04	1.23	RP11-475C16.1	chr6	processed_pseudogene
ENSG00000143847.15	2.25	1.01	3.28	3.53	PPFIA4	chr1	protein_coding	protein tyrosine phosphatase, receptor type, f polypeptide (PTPRF), interacting protein (liprin), alpha 4
ENSG00000159674.11	12.39	11.17	11.58	12.96	SPON2	chr4	protein_coding	spondin 2, extracellular matrix protein
ENSG00000228478.1	0.08	0	0.07	0	RP1-290I10.3	chr6	lincRNA
ENSG00000165661.15	29.16	23.3	22.94	27.98	QSOX2	chr9	protein_coding	quiescin Q6 sulfhydryl oxidase 2
ENSG00000110031.12	1.91	1.65	1.34	1.04	LPXN	chr11	protein_coding	leupaxin
ENSG00000164591.13	0	0	0.01	0	MYOZ3	chr5	protein_coding	myozenin 3
ENSG00000060140.8	0	0.35	0.14	0.13	STYK1	chr12	protein_coding	serine/threonine/tyrosine kinase 1
ENSG00000001629.9	5.42	7.54	11.16	10.02	ANKIB1	chr7	protein_coding	ankyrin repeat and IBR domain containing 1
ENSG00000169894.17	1.06	0.64	0.38	0.7	MUC3A	chr7	protein_coding	mucin 3A, cell surface associated
ENSG00000173273.15	3.93	4.57	6.25	5.78	TNKS	chr8	protein_coding	tankyrase, TRF1-interacting ankyrin-related ADP-ribose polymerase
ENSG00000261093.1	0	0	0.02	0.06	CTD-3126B10.1	chr16	antisense
ENSG00000234129.7	0.35	0.24	0.25	0.32	RP11-120D5.1	chrX	lincRNA
ENSG00000204922.4	9.2	11.52	6.82	6.2	UQCC3	chr11	protein_coding	ubiquinol-cytochrome c reductase complex assembly factor 3
ENSG00000149633.11	0.55	0.24	0	0.18	KIAA1755	chr20	protein_coding	KIAA1755
ENSG00000152782.16	1.28	1.27	1.59	1.78	PANK1	chr10	protein_coding	pantothenate kinase 1
ENSG00000197119.12	2.99	2.33	3.08	3.14	SLC25A29	chr14	protein_coding	solute carrier family 25 (mitochondrial carnitine/acylcarnitine carrier), member 29
ENSG00000095485.16	11.84	17.64	15.23	14.64	CWF19L1	chr10	protein_coding	CWF19-like 1, cell cycle control (S. pombe)
ENSG00000256847.1	0.06	0	0	0	CCND2P1	chr11	processed_pseudogene	cyclin D2 pseudogene 1
ENSG00000108784.9	13.21	11.4	8.77	10.99	NAGLU	chr17	protein_coding	N-acetylglucosaminidase, alpha
ENSG00000105825.11	2.76	3.75	3.15	2.32	TFPI2	chr7	protein_coding	tissue factor pathway inhibitor 2
ENSG00000113248.5	0	0.01	0.01	0.01	PCDHB15	chr5	protein_coding	protocadherin beta 15
ENSG00000127720.7	0.97	0.7	0.84	1.34	METTL25	chr12	protein_coding	methyltransferase like 25
ENSG00000281333.1	0.18	0	0	0.22	RP11-900F13.3	chr12	antisense
ENSG00000143226.13	0	0.13	0	0.17	FCGR2A	chr1	protein_coding	Fc fragment of IgG, low affinity IIa, receptor (CD32)
ENSG00000164885.12	9.95	10.76	8.1	7.81	CDK5	chr7	protein_coding	cyclin-dependent kinase 5
ENSG00000174238.14	17.88	19.25	19.24	20.54	PITPNA	chr17	protein_coding	phosphatidylinositol transfer protein, alpha
ENSG00000164088.17	2.77	1.85	2.11	3.44	PPM1M	chr3	protein_coding	protein phosphatase, Mg2+/Mn2+ dependent, 1M
ENSG00000151233.10	1	1.27	1.89	1.77	GXYLT1	chr12	protein_coding	glucoside xylosyltransferase 1
ENSG00000280634.1	0	0	0.02	0	THRIL	chr12	antisense	TNF and HNRNPL related immunoregulatory long non-coding RNA
ENSG00000245105.2	0	0.15	0.31	0.18	A2M-AS1	chr12	antisense	A2M antisense RNA 1 (head to head)
ENSG00000259098.1	1.59	1.86	2.3	2	RP11-603B24.2	chr15	processed_pseudogene
ENSG00000259264.5	0.27	0.3	0.23	0.48	RP11-60L3.1	chr15	antisense
ENSG00000170190.15	4.59	2.97	3.42	3.5	SLC16A5	chr17	protein_coding	solute carrier family 16 (monocarboxylate transporter), member 5
ENSG00000275221.1	1.38	2.67	2.42	0.84	HIST1H2AK	chr6	protein_coding	histone cluster 1, H2ak
ENSG00000126767.17	34.56	26.66	25.16	26.97	ELK1	chrX	protein_coding	ELK1, member of ETS oncogene family
ENSG00000241978.9	0.06	0.04	0.06	0.07	AKAP2	chr9	protein_coding	A kinase (PRKA) anchor protein 2
ENSG00000111897.6	16.96	21.36	28.51	29.43	SERINC1	chr6	protein_coding	serine incorporator 1
ENSG00000206418.3	11.7	12.61	13.3	14.54	RAB12	chr18	protein_coding	RAB12, member RAS oncogene family
ENSG00000233539.5	0	0	0	0.05	AC011294.3	chr7	lincRNA
ENSG00000128699.13	4.32	4.68	6.26	4.95	ORMDL1	chr2	protein_coding	ORMDL sphingolipid biosynthesis regulator 1
ENSG00000168061.13	18.42	17.2	10.65	14.89	SAC3D1	chr11	protein_coding	SAC3 domain containing 1
ENSG00000176102.11	9.75	11.39	12.91	11.31	CSTF3	chr11	protein_coding	cleavage stimulation factor, 3' pre-RNA, subunit 3, 77kDa
ENSG00000171940.13	5.92	7.66	13.41	11.51	ZNF217	chr20	protein_coding	zinc finger protein 217
ENSG00000166598.12	177.29	241.24	286.94	302.2	HSP90B1	chr12	protein_coding	heat shock protein 90kDa beta (Grp94), member 1
ENSG00000153201.15	3.67	5.94	6.95	3.84	RANBP2	chr2	protein_coding	RAN binding protein 2
ENSG00000136295.14	79.56	50.89	52.6	69.54	TTYH3	chr7	protein_coding	tweety family member 3
ENSG00000214135.8	2.22	1.98	4.67	4.36	AC024560.3	chr3	transcribed_unprocessed_pseudogene
ENSG00000183801.7	0.31	0.3	0.4	0.16	OLFML1	chr11	protein_coding	olfactomedin-like 1
ENSG00000138386.16	2.26	3.98	7.03	5.78	NAB1	chr2	protein_coding	NGFI-A binding protein 1 (EGR1 binding protein 1)
ENSG00000139233.6	4.29	4.99	4.78	4.85	LLPH	chr12	protein_coding	LLP homolog, long-term synaptic facilitation (Aplysia)
ENSG00000271997.1	0	0	0	0.04	RP11-97O12.6	chr15	sense_intronic
ENSG00000175820.3	0	0.01	0	0	CCDC168	chr13	protein_coding	coiled-coil domain containing 168
ENSG00000273566.1	0.16	0	0	0	Metazoa_SRP	chr10	misc_RNA
ENSG00000264991.1	0	0	4.87	0	AP001205.1	chr8	miRNA
ENSG00000147697.8	0.35	0.17	0.07	0.04	GSDMC	chr8	protein_coding	gasdermin C
ENSG00000235453.7	0.51	0	0.21	0.45	TOPORS-AS1	chr9	antisense	TOPORS antisense RNA 1
ENSG00000274150.1	0.09	0	0	0.03	FADS2P1	chr11	unprocessed_pseudogene	fatty acid desaturase 2 pseudogene 1
ENSG00000109220.10	8.73	6.61	6.12	6.61	CHIC2	chr4	protein_coding	cysteine-rich hydrophobic domain 2
ENSG00000280076.1	0	0	0	0.04	RP11-326A13.2	chr15	TEC
ENSG00000254779.4	0.18	0.36	0.1	0.14	EGLN1P1	chr15	transcribed_processed_pseudogene	egl-9 family hypoxia-inducible factor 1 pseudogene 1
ENSG00000137331.11	213.03	183.98	134.48	151.48	IER3	chr6	protein_coding	immediate early response 3
ENSG00000165244.6	4.88	5.31	10.04	7.46	ZNF367	chr9	protein_coding	zinc finger protein 367
ENSG00000166037.10	9.52	13.79	17.06	15.62	CEP57	chr11	protein_coding	centrosomal protein 57kDa
ENSG00000227383.1	0	0.28	0	0	RP11-571F15.2	chr9	processed_pseudogene
ENSG00000132840.9	0	0	0.11	0	BHMT2	chr5	protein_coding	betaine--homocysteine S-methyltransferase 2
ENSG00000134759.13	4.32	4.22	5.09	5.3	ELP2	chr18	protein_coding	elongator acetyltransferase complex subunit 2
ENSG00000169919.16	27.26	22.54	23.3	22.27	GUSB	chr7	protein_coding	glucuronidase, beta
ENSG00000015413.9	0.27	0.19	0.18	0.29	DPEP1	chr16	protein_coding	dipeptidase 1 (renal)
ENSG00000260672.1	0.22	0	0.22	0	RP11-1006G14.1	chr15	lincRNA
ENSG00000122691.12	1.31	1.4	2.03	1.75	TWIST1	chr7	protein_coding	twist family bHLH transcription factor 1
ENSG00000262140.1	0	0	0	0.04	RP11-417N10.3	chr16	unprocessed_pseudogene
ENSG00000243742.5	0.64	0.3	0.22	0.64	RPLP0P2	chr11	transcribed_processed_pseudogene	ribosomal protein, large, P0 pseudogene 2
ENSG00000164647.8	0.59	0.94	0.81	0.17	STEAP1	chr7	protein_coding	six transmembrane epithelial antigen of the prostate 1
ENSG00000102763.15	1.55	2	2.4	2.51	VWA8	chr13	protein_coding	von Willebrand factor A domain containing 8
ENSG00000186409.14	0	0.05	0	0	CCDC30	chr1	protein_coding	coiled-coil domain containing 30
ENSG00000258137.5	0.64	0.39	0.58	0.2	RP11-753H16.3	chr12	antisense
ENSG00000060982.14	0	0	0	0.01	BCAT1	chr12	protein_coding	branched chain amino-acid transaminase 1, cytosolic
ENSG00000101868.10	6.09	8.87	12.17	12.3	POLA1	chrX	protein_coding	polymerase (DNA directed), alpha 1, catalytic subunit
ENSG00000228526.3	0.22	0.45	0	0.45	RP3-510D11.1	chr1	lincRNA
ENSG00000200428.1	0	0	0.33	0	Y_RNA	chr12	misc_RNA
ENSG00000205790.1	0	0	0	0.06	DPP9-AS1	chr19	antisense	DPP9 antisense RNA 1
ENSG00000234287.1	0	0.36	0.3	0.14	RP11-761N21.2	chr3	processed_pseudogene
ENSG00000100532.11	1.26	1.77	2.09	2.47	CGRRF1	chr14	protein_coding	cell growth regulator with ring finger domain 1
ENSG00000183598.3	0.77	1	0.83	0.62	HIST2H3D	chr1	protein_coding	histone cluster 2, H3d
ENSG00000167613.15	0	0	0.05	0.01	LAIR1	chr19	protein_coding	leukocyte-associated immunoglobulin-like receptor 1
ENSG00000243568.2	0	0	0	0.23	RP11-2I17.1	chr15	processed_pseudogene
ENSG00000157870.14	6.97	6.56	5.33	5.68	FAM213B	chr1	protein_coding	family with sequence similarity 213, member B
ENSG00000228801.5	1.48	0.31	0.92	0.48	RP11-110G21.1	chr8	antisense
ENSG00000162521.18	17.12	19.68	22.86	26.06	RBBP4	chr1	protein_coding	retinoblastoma binding protein 4
ENSG00000256196.1	0.37	0.53	0	0.04	RP11-881M11.4	chr11	antisense
ENSG00000256973.1	0	0.06	0.31	0	RP11-359J14.2	chr12	lincRNA
ENSG00000254911.3	9.11	10.46	9.59	7.45	SCARNA9	chr11	antisense	small Cajal body-specific RNA 9
ENSG00000141441.15	0.75	0.84	1.7	1.16	GAREM	chr18	protein_coding	GRB2 associated, regulator of MAPK1
ENSG00000132405.18	13.44	10.58	12.92	13.42	TBC1D14	chr4	protein_coding	TBC1 domain family, member 14
ENSG00000260364.1	0	0.23	0.15	0	RP11-256I9.3	chr16	lincRNA
ENSG00000233013.8	0.21	0	0	0	FAM157B	chr9	lincRNA	family with sequence similarity 157, member B
ENSG00000269220.1	0	0	0	0.08	LINC00528	chr22	lincRNA	long intergenic non-protein coding RNA 528
ENSG00000137770.13	2.4	3.43	6.44	5.03	CTDSPL2	chr15	protein_coding	CTD (carboxy-terminal domain, RNA polymerase II, polypeptide A) small phosphatase like 2
ENSG00000224881.1	0.15	0.31	0.56	0.45	AC068279.3	chr2	processed_pseudogene
ENSG00000266803.1	0	0	0.28	0	RP1-77H15.1	chr17	sense_intronic
ENSG00000117266.15	9.52	6.41	7.73	10.01	CDK18	chr1	protein_coding	cyclin-dependent kinase 18
ENSG00000120675.5	2.52	3.32	4.08	2.88	DNAJC15	chr13	protein_coding	DnaJ (Hsp40) homolog, subfamily C, member 15
ENSG00000163576.17	0.06	0	0	0.04	EFHB	chr3	protein_coding	EF-hand domain family, member B
ENSG00000013583.8	7.13	10.92	9.81	9.93	HEBP1	chr12	protein_coding	heme binding protein 1
ENSG00000072609.17	0.56	0.47	0.42	0.32	CHFR	chr12	protein_coding	checkpoint with forkhead and ring finger domains, E3 ubiquitin protein ligase
ENSG00000179873.14	0	0.01	0	0	NLRP11	chr19	protein_coding	NLR family, pyrin domain containing 11
ENSG00000254783.1	0.37	0.25	0.26	0.49	RP11-320L11.2	chr11	processed_pseudogene
ENSG00000277959.1	0.14	0	0	0.33	RP11-45A17.2	chr10	antisense
ENSG00000222522.1	0	0	0.7	0	RNU6-519P	chr8	snRNA	RNA, U6 small nuclear 519, pseudogene
ENSG00000182742.5	0	0	0.07	0.07	HOXB4	chr17	protein_coding	homeobox B4
ENSG00000196139.11	5.49	7.21	6.9	9.41	AKR1C3	chr10	protein_coding	aldo-keto reductase family 1, member C3
ENSG00000073803.13	0.71	1.12	0.8	0.84	MAP3K13	chr3	protein_coding	mitogen-activated protein kinase kinase kinase 13
ENSG00000232774.7	0.54	0.34	0.99	0.84	FLJ22447	chr14	lincRNA
ENSG00000233184.6	1.93	2.49	3.11	2.33	RP11-421L21.3	chr1	antisense
ENSG00000129007.14	0.75	0.72	1.61	1.61	CALML4	chr15	protein_coding	calmodulin-like 4
ENSG00000250994.1	0.44	0	0	0.26	AC005355.1	chr5	lincRNA
ENSG00000188451.8	0	0.09	0	0	SRP72P2	chr6	processed_pseudogene	signal recognition particle 72kDa pseudogene 2
ENSG00000198804.2	2501.17	2533.31	3197.84	2761.67	MT-CO1	chrM	protein_coding	mitochondrially encoded cytochrome c oxidase I
ENSG00000132952.11	1.17	2.01	3.57	2.7	USPL1	chr13	protein_coding	ubiquitin specific peptidase like 1
ENSG00000198677.10	4.51	7.25	9.82	7.14	TTC37	chr5	protein_coding	tetratricopeptide repeat domain 37
ENSG00000114503.10	28.56	33.02	34.59	32.71	NCBP2	chr3	protein_coding	nuclear cap binding protein subunit 2, 20kDa
ENSG00000183742.12	0.04	0	0	0.02	MACC1	chr7	protein_coding	metastasis associated in colon cancer 1
ENSG00000239040.1	2.2	0	0	0	Y_RNA	chr4	misc_RNA
ENSG00000071564.14	23.76	18.24	19.12	22.44	TCF3	chr19	protein_coding	transcription factor 3
ENSG00000087245.12	0.06	0.04	0.01	0.14	MMP2	chr16	protein_coding	matrix metallopeptidase 2
ENSG00000270165.1	0	0.08	0	0.32	RP11-167P11.2	chr16	sense_intronic
ENSG00000139988.9	0	0	0.08	0	RDH12	chr14	protein_coding	retinol dehydrogenase 12 (all-trans/9-cis/11-cis)
ENSG00000237522.1	0	0	0.28	0.03	NONOP2	chr2	processed_pseudogene	non-POU domain containing, octamer-binding pseudogene 2
ENSG00000266783.1	0.22	0.09	0.36	0.14	RP11-715F3.2	chr18	sense_intronic
ENSG00000204271.10	2.06	2.28	4.57	2.79	SPIN3	chrX	protein_coding	spindlin family, member 3
ENSG00000229001.1	0	0	0	0.07	ACTBP14	chr10	processed_pseudogene	actin, beta pseudogene 14
ENSG00000270996.1	0	0	0.17	0	RP11-342K6.4	chr2	lincRNA
ENSG00000177984.6	0.83	0.3	0.1	0.53	LCN15	chr9	protein_coding	lipocalin 15
ENSG00000104660.17	7.04	9.9	10.12	10.37	LEPROTL1	chr8	protein_coding	leptin receptor overlapping transcript-like 1
ENSG00000104866.10	10.06	7.73	6.71	8.16	PPP1R37	chr19	protein_coding	protein phosphatase 1, regulatory subunit 37
ENSG00000188559.13	0.94	0.68	1.45	1.59	RALGAPA2	chr20	protein_coding	Ral GTPase activating protein, alpha subunit 2 (catalytic)
ENSG00000253739.1	0.42	0	0	0	RNU6-323P	chr8	snRNA	RNA, U6 small nuclear 323, pseudogene
ENSG00000144589.20	6.03	5.01	4.95	4.32	STK11IP	chr2	protein_coding	serine/threonine kinase 11 interacting protein
ENSG00000276231.4	0.03	0	0.11	0	PIK3R6	chr17	protein_coding	phosphoinositide-3-kinase, regulatory subunit 6
ENSG00000253208.1	0	0	0.14	0	RP11-1G11.2	chr8	processed_pseudogene
ENSG00000237149.5	1.65	1.45	1.92	1.81	ZNF503-AS2	chr10	antisense	ZNF503 antisense RNA 2
ENSG00000152409.8	0.93	1.51	2.27	1.63	JMY	chr5	protein_coding	junction mediating and regulatory protein, p53 cofactor
ENSG00000162599.15	0.68	0.81	1.57	1.41	NFIA	chr1	protein_coding	nuclear factor I/A
ENSG00000104812.14	55.34	35.91	35.51	38.65	GYS1	chr19	protein_coding	glycogen synthase 1 (muscle)
ENSG00000091651.8	18.22	21.04	20.08	20.78	ORC6	chr16	protein_coding	origin recognition complex, subunit 6
ENSG00000226745.2	0.07	0	0	0	RP11-115D7.3	chr1	processed_pseudogene
ENSG00000178458.5	0.22	0	0	0	H3F3AP6	chr4	processed_pseudogene	H3 histone, family 3A, pseudogene 6
ENSG00000108576.9	0	0	0.04	0	SLC6A4	chr17	protein_coding	solute carrier family 6 (neurotransmitter transporter), member 4
ENSG00000130758.7	7.01	5	4.12	5.4	MAP3K10	chr19	protein_coding	mitogen-activated protein kinase kinase kinase 10
ENSG00000260466.1	0.26	2.01	0.44	1.96	RP4-536B24.2	chr16	antisense
ENSG00000124784.8	10.4	13.17	12.76	10.26	RIOK1	chr6	protein_coding	RIO kinase 1
ENSG00000087076.8	0.47	0.33	0.27	0.23	HSD17B14	chr19	protein_coding	hydroxysteroid (17-beta) dehydrogenase 14
ENSG00000279987.1	0	0	0	0.09	AC008103.4	chr22	sense_intronic
ENSG00000111785.18	1.64	2.37	2.94	2.66	RIC8B	chr12	protein_coding	RIC8 guanine nucleotide exchange factor B
ENSG00000156475.18	0.17	0.17	0.21	0.1	PPP2R2B	chr5	protein_coding	protein phosphatase 2, regulatory subunit B, beta
ENSG00000091073.19	8.89	7.61	5.56	7.43	DTX2	chr7	protein_coding	deltex 2, E3 ubiquitin ligase
ENSG00000171116.7	0.21	0.19	0.06	0.15	HSFX1	chrX	protein_coding	heat shock transcription factor family, X linked 1
ENSG00000230641.1	0	0	0	0.13	USP12-AS2	chr13	antisense	USP12 antisense RNA 2 (head to head)
ENSG00000172586.7	23.16	28.77	18.96	18.78	CHCHD1	chr10	protein_coding	coiled-coil-helix-coiled-coil-helix domain containing 1
ENSG00000173175.14	0	0	0.04	0.04	ADCY5	chr3	protein_coding	adenylate cyclase 5
ENSG00000070444.14	7.81	5.73	5.69	6.93	MNT	chr17	protein_coding	MAX network transcriptional repressor
ENSG00000275812.1	0.41	0.28	0	0.11	RP4-697K14.15	chr20	antisense
ENSG00000248275.1	0	0.31	0.44	0.95	TRIM52-AS1	chr5	processed_transcript	TRIM52 antisense RNA 1 (head to head)
ENSG00000057657.14	1.87	1.47	2.75	2.83	PRDM1	chr6	protein_coding	PR domain containing 1, with ZNF domain
ENSG00000270367.1	0	0.07	0	0	RP11-331G2.6	chr3	processed_pseudogene
ENSG00000246582.2	4.78	4.14	2.8	3	RP11-1149O23.3	chr8	processed_transcript
ENSG00000267261.5	95.53	102.98	83.65	92.08	CTD-2132N18.3	chr17	protein_coding
ENSG00000237689.1	0.45	0	0	0.22	AC007064.24	chr22	lincRNA
ENSG00000075461.5	0.35	0.3	0.06	0.3	CACNG4	chr17	protein_coding	calcium channel, voltage-dependent, gamma subunit 4
ENSG00000143850.12	4.43	3.66	4.13	5.45	PLEKHA6	chr1	protein_coding	pleckstrin homology domain containing, family A member 6
ENSG00000204055.4	0	0.13	0.04	0.09	RP11-247A12.2	chr9	antisense
ENSG00000268714.3	0	0.11	0	0	CTD-2287O16.3	chr5	protein_coding
ENSG00000150459.12	31.22	30.19	23.59	25.05	SAP18	chr13	protein_coding	Sin3A-associated protein, 18kDa
ENSG00000231086.1	0	0	0	0.14	TSSK1A	chr22	unitary_pseudogene	testis-specific serine kinase 1A pseudogene
ENSG00000258791.7	0	0.04	0	0.11	LINC00520	chr14	lincRNA	long intergenic non-protein coding RNA 520
ENSG00000259024.6	0.5	0.76	0.93	1.17	TVP23C-CDRT4	chr17	protein_coding	TVP23C-CDRT4 readthrough
ENSG00000054179.11	3.03	1.33	1.25	1.32	ENTPD2	chr9	protein_coding	ectonucleoside triphosphate diphosphohydrolase 2
ENSG00000117152.13	0.12	0.04	0.04	0.02	RGS4	chr1	protein_coding	regulator of G-protein signaling 4
ENSG00000212290.1	0.79	0	0	1.27	RNA5SP424	chr16	rRNA	RNA, 5S ribosomal pseudogene 424
ENSG00000159224.4	0	0	0.05	0	GIP	chr17	protein_coding	gastric inhibitory polypeptide
ENSG00000135316.17	20.46	30.07	33.58	28.17	SYNCRIP	chr6	protein_coding	synaptotagmin binding, cytoplasmic RNA interacting protein
ENSG00000115239.21	9.33	10.37	10.64	8.9	GPR75-ASB3	chr2	protein_coding	GPR75-ASB3 readthrough
ENSG00000180458.2	0	0	0.01	0	CTD-3064H18.4	chr19	antisense
ENSG00000272523.1	0.83	0.21	0.17	1.34	LINC01023	chr5	lincRNA	long intergenic non-protein coding RNA 1023
ENSG00000135776.4	2.42	2.03	4.4	3.36	ABCB10	chr1	protein_coding	ATP-binding cassette, sub-family B (MDR/TAP), member 10
ENSG00000119121.21	0.01	0.13	0.06	0.1	TRPM6	chr9	protein_coding	transient receptor potential cation channel, subfamily M, member 6
ENSG00000167740.9	2.95	1.55	2.29	2.23	CYB5D2	chr17	protein_coding	cytochrome b5 domain containing 2
ENSG00000185551.12	7.46	7.02	6.75	6.81	NR2F2	chr15	protein_coding	nuclear receptor subfamily 2, group F, member 2
ENSG00000165775.17	6.77	7.9	6.97	7.08	FUNDC2	chrX	protein_coding	FUN14 domain containing 2
ENSG00000259424.1	1.09	0.68	1.82	0.66	RP11-35O15.1	chr15	antisense
ENSG00000248554.1	0.4	1.12	0.73	0.83	RP11-159F24.6	chr5	antisense
ENSG00000279571.1	0.79	0.55	1.59	0.84	RP11-56D16.8	chr9	lincRNA
ENSG00000233509.2	0.15	0	0.06	0.23	ZNF197-AS1	chr3	antisense	ZNF197 antisense RNA 1
ENSG00000252512.1	0	0	0.31	0	RNA5SP206	chr6	rRNA	RNA, 5S ribosomal pseudogene 206
ENSG00000186635.14	37.06	30.13	25	30.99	ARAP1	chr11	protein_coding	ArfGAP with RhoGAP domain, ankyrin repeat and PH domain 1
ENSG00000260643.1	11.96	21.76	15.41	17.48	RP11-303E16.8	chr16	processed_transcript
ENSG00000179841.8	0.14	0.09	0.2	0.05	AKAP5	chr14	protein_coding	A kinase (PRKA) anchor protein 5
ENSG00000198744.5	0.99	0.25	0.49	0.27	RP5-857K21.11	chr1	unprocessed_pseudogene
ENSG00000198924.7	1.99	4.15	4.92	3.73	DCLRE1A	chr10	protein_coding	DNA cross-link repair 1A
ENSG00000157326.18	6.98	6.49	3.62	3.45	DHRS4	chr14	protein_coding	dehydrogenase/reductase (SDR family) member 4
ENSG00000276691.1	0	0.25	0	0	RP5-1057I20.5	chr12	antisense
ENSG00000143553.10	41.96	44.88	31.7	32.65	SNAPIN	chr1	protein_coding	SNAP-associated protein
ENSG00000104863.11	2.69	1.21	0.72	0.6	LIN7B	chr19	protein_coding	lin-7 homolog B (C. elegans)
ENSG00000187951.10	2	1.67	3.95	2.68	ARHGAP11B	chr15	protein_coding	Rho GTPase activating protein 11B
ENSG00000126934.13	128.26	102.04	85.61	103.26	MAP2K2	chr19	protein_coding	mitogen-activated protein kinase kinase 2
ENSG00000279901.1	0.25	0.19	0.34	0.09	CTD-2270P14.2	chr16	TEC
ENSG00000177352.9	14.09	18.15	12.2	14.62	CCDC71	chr3	protein_coding	coiled-coil domain containing 71
ENSG00000240618.1	2.3	1.7	1.55	1.36	RP11-206L10.5	chr1	lincRNA
ENSG00000166024.13	3.35	4.76	5.88	5.73	R3HCC1L	chr10	protein_coding	R3H domain and coiled-coil containing 1-like
ENSG00000168890.13	1.36	1.29	0.74	1.46	TMEM150A	chr2	protein_coding	transmembrane protein 150A
ENSG00000261079.1	0	0.1	0.02	0.06	RP11-252A24.3	chr16	lincRNA
ENSG00000147872.9	26.2	21.19	19.84	16.89	PLIN2	chr9	protein_coding	perilipin 2
ENSG00000163424.8	0	0	0	0.16	C3orf30	chr3	protein_coding	chromosome 3 open reading frame 30
ENSG00000166396.12	0.88	1.62	0.87	1.64	SERPINB7	chr18	protein_coding	serpin peptidase inhibitor, clade B (ovalbumin), member 7
ENSG00000104756.15	20.53	22.73	28.02	25.43	KCTD9	chr8	protein_coding	potassium channel tetramerization domain containing 9
ENSG00000282393.1	1.3	1.74	2.47	1.9	CTD-3113P16.11	chr19	lincRNA
ENSG00000103855.17	40.63	29.14	27.02	36.24	CD276	chr15	protein_coding	CD276 molecule
ENSG00000132879.13	3.39	2.66	2.6	3.58	FBXO44	chr1	protein_coding	F-box protein 44
ENSG00000145217.13	0.13	0.1	0.15	0.14	SLC26A1	chr4	protein_coding	solute carrier family 26 (anion exchanger), member 1
ENSG00000118298.10	0	0.19	0	0	CA14	chr1	protein_coding	carbonic anhydrase XIV
ENSG00000130635.15	186.12	119.74	137.77	174.87	COL5A1	chr9	protein_coding	collagen, type V, alpha 1
ENSG00000220891.1	0	0.01	0	0.04	LL22NC03-63E9.3	chr22	antisense
ENSG00000224046.1	0.77	0	0.25	0.33	AC005076.5	chr7	antisense
ENSG00000080511.3	0	0	0	0.04	RDH8	chr19	protein_coding	retinol dehydrogenase 8 (all-trans)
ENSG00000029153.14	1.55	2.22	3.22	3.62	ARNTL2	chr12	protein_coding	aryl hydrocarbon receptor nuclear translocator-like 2
ENSG00000255537.1	0	0.08	0.01	0.02	AP000708.1	chr11	antisense
ENSG00000198618.5	2.91	2.11	0.23	1.32	PPIAP22	chr21	processed_pseudogene	peptidylprolyl isomerase A (cyclophilin A) pseudogene 22
ENSG00000177082.12	8.74	9.93	9.41	8.81	WDR73	chr15	protein_coding	WD repeat domain 73
ENSG00000227234.1	3.19	0.1	0.41	0.7	SPANXB1	chrX	protein_coding	SPANX family, member B1
ENSG00000267744.1	0	0.12	0	0.2	RP11-799D4.1	chr17	transcribed_processed_pseudogene
ENSG00000153064.11	0	0	0	0.01	BANK1	chr4	protein_coding	B-cell scaffold protein with ankyrin repeats 1
ENSG00000279281.1	0	0	0	0.04	RP11-226M10.3	chr17	TEC
ENSG00000120896.13	16.2	15.18	10.63	11.22	SORBS3	chr8	protein_coding	sorbin and SH3 domain containing 3
ENSG00000260711.2	0	0.02	0.01	0	RP11-747H7.3	chr14	sense_intronic
ENSG00000232196.3	0	0	0.09	0.02	MTRNR2L4	chr16	protein_coding	MT-RNR2-like 4
ENSG00000262587.2	0.32	0.12	0.47	0.45	RP11-266L9.4	chr16	transcribed_unprocessed_pseudogene
ENSG00000238039.1	0	0	0	0.06	AF011889.2	chrX	lincRNA
ENSG00000124535.15	24.08	22.25	21.71	23.09	WRNIP1	chr6	protein_coding	Werner helicase interacting protein 1
ENSG00000173349.5	5.05	5.44	5.22	4.88	SFT2D3	chr2	protein_coding	SFT2 domain containing 3
ENSG00000109107.13	131.92	103.28	92.48	116.59	ALDOC	chr17	protein_coding	aldolase C, fructose-bisphosphate
ENSG00000109771.15	0.04	0.12	0.08	0.08	LRP2BP	chr4	protein_coding	LRP2 binding protein
ENSG00000172824.14	0	0	0.06	0.08	CES4A	chr16	protein_coding	carboxylesterase 4A
ENSG00000256288.1	0	0	0	0.06	RP11-277P12.10	chr12	lincRNA
ENSG00000270103.3	0	0	0	1.39	RNU11	chr1	lincRNA	RNA, U11 small nuclear
ENSG00000164825.3	0	0.38	0	0.31	DEFB1	chr8	protein_coding	defensin, beta 1
ENSG00000090372.14	21.29	18.97	13.81	15.25	STRN4	chr19	protein_coding	striatin, calmodulin binding protein 4
ENSG00000198440.9	0	0	0.01	0	ZNF583	chr19	protein_coding	zinc finger protein 583
ENSG00000109323.8	8.94	7.72	9.92	10.81	MANBA	chr4	protein_coding	mannosidase, beta A, lysosomal
ENSG00000230666.5	0.03	0.07	0.16	0.01	CEACAM22P	chr19	transcribed_unprocessed_pseudogene	carcinoembryonic antigen-related cell adhesion molecule 22, pseudogene
ENSG00000208037.1	0	0	0	0.45	MIR320A	chr8	miRNA	microRNA 320a
ENSG00000089335.20	3.46	5.05	7.13	4.66	ZNF302	chr19	protein_coding	zinc finger protein 302
ENSG00000181638.17	0.86	0.87	0.69	0.76	ZFP41	chr8	protein_coding	ZFP41 zinc finger protein
ENSG00000134108.12	10.26	17.23	21.57	20.93	ARL8B	chr3	protein_coding	ADP-ribosylation factor-like 8B
ENSG00000113312.10	51.42	62.65	59.71	58.54	TTC1	chr5	protein_coding	tetratricopeptide repeat domain 1
ENSG00000256128.5	0.06	0	0	0	LINC00944	chr12	lincRNA	long intergenic non-protein coding RNA 944
ENSG00000179397.17	0	0	0.09	0.11	C1orf101	chr1	protein_coding	chromosome 1 open reading frame 101
ENSG00000279453.1	0.09	0.22	0.36	0.01	RP3-425C14.4	chr6	TEC
ENSG00000253216.1	1.33	0	0	0	RP11-744J10.2	chr8	processed_pseudogene
ENSG00000266473.1	0	0	0.11	0.11	RP11-401F2.3	chr17	antisense
ENSG00000140575.12	47.89	62.51	101.23	91.22	IQGAP1	chr15	protein_coding	IQ motif containing GTPase activating protein 1
ENSG00000158486.13	0.03	0.01	0	0.03	DNAH3	chr16	protein_coding	dynein, axonemal, heavy chain 3
ENSG00000110436.11	0.01	0.03	0.01	0	SLC1A2	chr11	protein_coding	solute carrier family 1 (glial high affinity glutamate transporter), member 2
ENSG00000100647.7	3.17	2.36	2.38	2.78	SUSD6	chr14	protein_coding	sushi domain containing 6
ENSG00000275367.1	0	0.03	0.09	0.11	RP11-266K4.14	chr12	lincRNA
ENSG00000101216.10	11.22	7.85	7.45	9.86	GMEB2	chr20	protein_coding	glucocorticoid modulatory element binding protein 2
ENSG00000004468.12	0.03	0.03	0.05	0.02	CD38	chr4	protein_coding	CD38 molecule
ENSG00000170632.13	17.45	22.32	18.82	20.26	ARMC10	chr7	protein_coding	armadillo repeat containing 10
ENSG00000143374.14	31.08	32.01	21.13	25.62	TARS2	chr1	protein_coding	threonyl-tRNA synthetase 2, mitochondrial (putative)
ENSG00000245156.1	0	0	0	0.01	RP11-867G23.3	chr11	lincRNA
ENSG00000073331.17	0.18	0.22	0.04	0.09	ALPK1	chr4	protein_coding	alpha-kinase 1
ENSG00000225643.1	0.38	0.28	0.95	0	RP11-70P17.1	chr1	lincRNA
ENSG00000183484.11	0.01	0.04	0.1	0.01	GPR132	chr14	protein_coding	G protein-coupled receptor 132
ENSG00000274184.1	0	0	0	0.07	RP11-158H5.8	chr18	lincRNA
ENSG00000257243.1	0	0	0.35	0.13	RP11-133N21.7	chr12	processed_pseudogene
ENSG00000135049.15	2.63	3.2	5.13	4.18	AGTPBP1	chr9	protein_coding	ATP/GTP binding protein 1
ENSG00000158571.10	0	0.04	0.17	0.09	PFKFB1	chrX	protein_coding	6-phosphofructo-2-kinase/fructose-2,6-biphosphatase 1
ENSG00000198555.7	0.49	0.96	0.85	0.45	RP11-598D12.4	chr16	unprocessed_pseudogene
ENSG00000229931.1	1.66	0.46	2.64	1.26	RP1-151F17.1	chr6	antisense
ENSG00000274340.1	0	0	0.29	0	RP11-435J9.2	chr15	lincRNA
ENSG00000184584.12	12.66	12.64	9.5	9.42	TMEM173	chr5	protein_coding	transmembrane protein 173
ENSG00000153879.8	6.64	6.34	7.84	7.56	CEBPG	chr19	protein_coding	CCAAT/enhancer binding protein (C/EBP), gamma
ENSG00000237021.2	0.22	0.02	0.04	0.12	RP3-486I3.7	chr6	lincRNA
ENSG00000260936.1	0.67	0	0.12	0.18	FTO-IT1	chr16	sense_intronic	FTO intronic transcript 1
ENSG00000226107.1	0	0	0.53	0.38	AC004383.3	chrX	processed_pseudogene
ENSG00000113460.12	38.3	52.36	57.44	54.84	BRIX1	chr5	protein_coding	BRX1, biogenesis of ribosomes
ENSG00000090889.11	14.57	16.28	21.14	19.36	KIF4A	chrX	protein_coding	kinesin family member 4A
ENSG00000163870.14	39.64	42.91	35.58	36.78	TPRA1	chr3	protein_coding	transmembrane protein, adipocyte asscociated 1
ENSG00000181126.13	0	0	0.19	0.18	HLA-V	chr6	transcribed_unprocessed_pseudogene	major histocompatibility complex, class I, V (pseudogene)
ENSG00000258768.2	0	0.04	0.05	0.02	CTD-2292M16.8	chr14	lincRNA
ENSG00000184730.10	0	0	0.05	0.1	APOBR	chr16	protein_coding	apolipoprotein B receptor
ENSG00000241316.6	0.37	0.02	0.07	0.21	SUCLG2-AS1	chr3	lincRNA	SUCLG2 antisense RNA 1 (head to head)
ENSG00000230221.2	0	0	0	0.06	RP11-173G21.1	chr9	processed_pseudogene
ENSG00000269946.1	0	0	0.16	0.16	RP11-2B6.3	chr9	lincRNA
ENSG00000121073.13	25.89	27.63	25.44	21.16	SLC35B1	chr17	protein_coding	solute carrier family 35, member B1
ENSG00000140876.11	1.11	0.34	0.43	0.78	NUDT7	chr16	protein_coding	nudix (nucleoside diphosphate linked moiety X)-type motif 7
ENSG00000167615.16	6.38	4.97	8.37	8.17	LENG8	chr19	protein_coding	leukocyte receptor cluster (LRC) member 8
ENSG00000204542.2	0.4	0	0	0	C6orf15	chr6	protein_coding	chromosome 6 open reading frame 15
ENSG00000008056.12	0	0.13	0.05	0.09	SYN1	chrX	protein_coding	synapsin I
ENSG00000238083.7	0.23	0.31	0.64	0.39	LRRC37A2	chr17	protein_coding	leucine rich repeat containing 37, member A2
ENSG00000166436.15	1	0.87	1.23	0.87	TRIM66	chr11	protein_coding	tripartite motif containing 66
ENSG00000101400.5	13.48	11.08	10.37	10.9	SNTA1	chr20	protein_coding	syntrophin, alpha 1
ENSG00000187123.14	0.83	1.33	1.53	1.4	LYPD6	chr2	protein_coding	LY6/PLAUR domain containing 6
ENSG00000182606.14	3.88	2.73	4	4.55	TRAK1	chr3	protein_coding	trafficking protein, kinesin binding 1
ENSG00000165029.15	0.16	0.42	0.48	0.36	ABCA1	chr9	protein_coding	ATP-binding cassette, sub-family A (ABC1), member 1
ENSG00000267123.5	6.77	4.98	5.53	7.45	CTD-2357A8.3	chr17	lincRNA
ENSG00000185215.8	29.28	22.98	23.87	24.96	TNFAIP2	chr14	protein_coding	tumor necrosis factor, alpha-induced protein 2
ENSG00000168152.12	0	0.59	0.25	0.39	THAP9	chr4	protein_coding	THAP domain containing 9
ENSG00000262362.1	0	0	0.25	0	LA16c-380H5.2	chr16	sense_overlapping
ENSG00000219445.2	0.09	0	0.02	0.06	RP11-3B12.3	chr7	lincRNA
ENSG00000277948.1	0	0.24	0	0	uc_338	chr2	misc_RNA
ENSG00000240687.1	0	0	0	0.13	RP11-521D12.1	chr2	lincRNA
ENSG00000102103.15	92.4	103.75	71.93	71.73	PQBP1	chrX	protein_coding	polyglutamine binding protein 1
ENSG00000161048.11	0.2	0.48	1.03	0.73	NAPEPLD	chr7	protein_coding	N-acyl phosphatidylethanolamine phospholipase D
ENSG00000257921.5	12.81	17.79	11.21	14.03	RP11-571M6.15	chr12	protein_coding
ENSG00000128805.14	0.87	0.85	0.98	0.62	ARHGAP22	chr10	protein_coding	Rho GTPase activating protein 22
ENSG00000260869.1	3.97	3.39	0.71	2.03	AC002310.13	chr16	protein_coding
ENSG00000171101.13	0.12	0	0	0	SIGLEC17P	chr19	transcribed_unprocessed_pseudogene	sialic acid binding Ig-like lectin 17, pseudogene
ENSG00000145014.17	4.12	2.76	4.75	5.8	TMEM44	chr3	protein_coding	transmembrane protein 44
ENSG00000029993.14	18.32	20.2	16.63	18.75	HMGB3	chrX	protein_coding	high mobility group box 3
ENSG00000125378.15	0.73	0.3	0.43	0.69	BMP4	chr14	protein_coding	bone morphogenetic protein 4
ENSG00000111087.9	0	0.09	0.05	0.06	GLI1	chr12	protein_coding	GLI family zinc finger 1
ENSG00000229503.1	0.09	0	0	0.08	AC092155.1	chr2	processed_pseudogene
ENSG00000257702.3	2.76	1.49	1.66	1.02	LBX2-AS1	chr2	antisense	LBX2 antisense RNA 1
ENSG00000250722.5	0.2	0.43	0.25	0.5	SEPP1	chr5	protein_coding	selenoprotein P, plasma, 1
ENSG00000253368.3	29.36	25.26	17.51	19.06	TRNP1	chr1	protein_coding	TMF1-regulated nuclear protein 1
ENSG00000273079.4	0	0.01	0.01	0.01	GRIN2B	chr12	protein_coding	glutamate receptor, ionotropic, N-methyl D-aspartate 2B
ENSG00000101003.9	7.06	7.86	7.95	7.99	GINS1	chr20	protein_coding	GINS complex subunit 1 (Psf1 homolog)
ENSG00000023171.14	10.37	7.13	8.67	9.69	GRAMD1B	chr11	protein_coding	GRAM domain containing 1B
ENSG00000229127.1	0	0	0.19	0.12	AC007038.7	chr2	antisense
ENSG00000215148.7	0	0.05	0	0.08	PRSS41	chr16	transcribed_unprocessed_pseudogene	protease, serine, 41
ENSG00000117013.14	0.13	0.17	0.06	0.04	KCNQ4	chr1	protein_coding	potassium channel, voltage gated KQT-like subfamily Q, member 4
ENSG00000173334.3	7.4	5.31	7.1	6.05	TRIB1	chr8	protein_coding	tribbles pseudokinase 1
ENSG00000204420.8	0	0.07	0	0.03	C6orf25	chr6	protein_coding	chromosome 6 open reading frame 25
ENSG00000198736.11	20.71	20.46	14.99	17.94	MSRB1	chr16	protein_coding	methionine sulfoxide reductase B1
ENSG00000214558.4	0	0	0.02	0	RP11-74E24.2	chr6	processed_pseudogene
ENSG00000260007.1	3.66	5.14	2.44	3.86	RP11-315D16.2	chr15	protein_coding
ENSG00000185495.10	1.49	1.01	1.99	1.97	RP11-504P24.3	chr1	transcribed_unprocessed_pseudogene
ENSG00000230074.1	0.2	0.75	0.69	1.21	RP11-195F19.9	chr9	antisense
ENSG00000204628.11	594.5	582.45	505.91	522.97	GNB2L1	chr5	protein_coding	guanine nucleotide binding protein (G protein), beta polypeptide 2-like 1
ENSG00000127054.18	21.27	14.45	13.3	16.16	CPSF3L	chr1	protein_coding	cleavage and polyadenylation specific factor 3-like
ENSG00000267289.1	0.3	0	0	0	CTD-2623N2.11	chr19	lincRNA
ENSG00000065457.10	6.33	6	5.4	6.43	ADAT1	chr16	protein_coding	adenosine deaminase, tRNA-specific 1
ENSG00000176746.6	0.16	0.12	0	0.15	MAGEB6	chrX	protein_coding	melanoma antigen family B6
ENSG00000119231.10	3.51	3.48	7.56	7.14	SENP5	chr3	protein_coding	SUMO1/sentrin specific peptidase 5
ENSG00000204564.11	11.19	7.51	7.02	10.28	C6orf136	chr6	protein_coding	chromosome 6 open reading frame 136
ENSG00000174547.13	63.92	71.97	46.45	43.32	MRPL11	chr11	protein_coding	mitochondrial ribosomal protein L11
ENSG00000242889.3	0	0.96	1.86	0.13	RN7SL449P	chr17	misc_RNA	RNA, 7SL, cytoplasmic 449, pseudogene
ENSG00000267629.3	0	0	0.04	0.01	AC138430.4	chr19	processed_transcript
ENSG00000167914.10	0	0	0.11	0	GSDMA	chr17	protein_coding	gasdermin A
ENSG00000231652.2	0.09	0.53	0.29	0.5	RP11-553A21.3	chr6	antisense
ENSG00000236334.2	0.01	0	0.06	0	PPIAL4G	chr1	protein_coding	peptidylprolyl isomerase A (cyclophilin A)-like 4G
ENSG00000090581.9	9.1	7	5.63	7.1	GNPTG	chr16	protein_coding	N-acetylglucosamine-1-phosphate transferase, gamma subunit
ENSG00000234031.1	0	0	0	0.05	RPS3AP44	chr13	processed_pseudogene	ribosomal protein S3a pseudogene 44
ENSG00000279059.1	0.43	0.79	1.23	1.2	RP11-257O5.2	chr17	TEC
ENSG00000100865.14	29.93	37.98	25.97	27.32	CINP	chr14	protein_coding	cyclin-dependent kinase 2 interacting protein
ENSG00000213079.9	2.9	4.96	5.98	5.65	SCAF8	chr6	protein_coding	SR-related CTD-associated factor 8
ENSG00000159322.17	25.21	25	25.14	22.87	ADPGK	chr15	protein_coding	ADP-dependent glucokinase
ENSG00000149289.10	0.74	0.84	1.45	0.96	ZC3H12C	chr11	protein_coding	zinc finger CCCH-type containing 12C
ENSG00000186301.8	0.16	0.04	0.28	0.24	MST1P2	chr1	unprocessed_pseudogene	macrophage stimulating 1 (hepatocyte growth factor-like) pseudogene 2
ENSG00000210164.1	4.66	0.67	0	0.54	MT-TG	chrM	Mt_tRNA	mitochondrially encoded tRNA glycine
ENSG00000162300.11	21.05	21.61	13.1	14.74	ZFPL1	chr11	protein_coding	zinc finger protein-like 1
ENSG00000205488.8	0.24	0.04	0.03	0.12	CALML3-AS1	chr10	antisense	CALML3 antisense RNA 1
ENSG00000138594.12	10.67	17.45	22.98	23.64	TMOD3	chr15	protein_coding	tropomodulin 3 (ubiquitous)
ENSG00000280189.1	0.02	0	0	0	RP11-491F9.2	chr16	TEC
ENSG00000132356.11	7.42	13.7	21.1	15.22	PRKAA1	chr5	protein_coding	protein kinase, AMP-activated, alpha 1 catalytic subunit
ENSG00000234705.1	0.41	0	0.91	0.44	HMGA1P4	chr9	antisense	high mobility group AT-hook 1 pseudogene 4
ENSG00000236287.7	6.6	8.72	14.16	8.46	ZBED5	chr11	protein_coding	zinc finger, BED-type containing 5
ENSG00000198812.4	0.02	0	0	0	LRRC10	chr12	protein_coding	leucine rich repeat containing 10
ENSG00000232859.9	0.27	0.67	0.63	0.52	LYRM9	chr17	protein_coding	LYR motif containing 9
ENSG00000070540.12	4.72	4.51	3.83	5.16	WIPI1	chr17	protein_coding	WD repeat domain, phosphoinositide interacting 1
ENSG00000148516.21	1.96	3.68	4.88	2.84	ZEB1	chr10	protein_coding	zinc finger E-box binding homeobox 1
ENSG00000078081.7	0	0.14	0.02	0.16	LAMP3	chr3	protein_coding	lysosomal-associated membrane protein 3
ENSG00000235437.7	3.6	3.58	3.44	4.09	LINC01278	chrX	processed_transcript	long intergenic non-protein coding RNA 1278
ENSG00000068028.17	21.44	20.47	18.41	18.07	RASSF1	chr3	protein_coding	Ras association (RalGDS/AF-6) domain family member 1
ENSG00000051341.13	1.14	1.71	2.37	1.37	POLQ	chr3	protein_coding	polymerase (DNA directed), theta
ENSG00000120075.5	0.69	0.92	1.88	0.89	HOXB5	chr17	protein_coding	homeobox B5
ENSG00000277050.1	0	0.08	0	0	RP11-102G14.1	chr14	antisense
ENSG00000113716.12	22.79	19.14	22.28	25.23	HMGXB3	chr5	protein_coding	HMG box domain containing 3
ENSG00000167962.12	44.31	31.43	28.64	34.13	ZNF598	chr16	protein_coding	zinc finger protein 598
ENSG00000269489.1	0	0	0.21	0.2	RP11-98D18.17	chr1	lincRNA
ENSG00000154342.5	0	0.14	0	0	WNT3A	chr1	protein_coding	wingless-type MMTV integration site family, member 3A
ENSG00000176208.8	0.82	0.85	1.38	0.88	ATAD5	chr17	protein_coding	ATPase family, AAA domain containing 5
ENSG00000182149.20	24.9	21.84	21.93	23.69	IST1	chr16	protein_coding	increased sodium tolerance 1 homolog (yeast)
ENSG00000278974.1	0	0	0.05	0	RP11-756P10.6	chr4	TEC
ENSG00000166548.15	2.44	1.93	1.76	1.89	TK2	chr16	protein_coding	thymidine kinase 2, mitochondrial
ENSG00000273373.1	0.79	0.29	3.77	1.29	RP5-1074L1.4	chr1	antisense
ENSG00000261124.1	0	0	0.3	0	AC135050.5	chr16	antisense
ENSG00000267627.5	0	0	0.05	0	RP11-905K4.1	chr18	lincRNA
ENSG00000270099.1	0	0.37	0	0	RP11-248J23.7	chr10	protein_coding
ENSG00000124831.18	9.83	10.64	17.59	16.17	LRRFIP1	chr2	protein_coding	leucine rich repeat (in FLII) interacting protein 1
ENSG00000222858.1	0	0	0	0.4	RNU6-920P	chr17	snRNA	RNA, U6 small nuclear 920, pseudogene
ENSG00000223872.1	0.33	1.59	2.23	1.67	AC006372.5	chr7	lincRNA
ENSG00000259672.1	0	0	0.06	0	RP11-69G7.1	chr15	lincRNA
ENSG00000251593.1	0.03	0.16	0	0	MSNP1	chr5	processed_pseudogene	moesin pseudogene 1
ENSG00000272949.1	0.42	0.36	0.34	0.48	RP11-514P8.8	chr7	processed_transcript
ENSG00000135318.11	24.76	31.11	36.15	33.05	NT5E	chr6	protein_coding	5'-nucleotidase, ecto (CD73)
ENSG00000257407.1	0.06	0	0.29	0	RP11-1028N23.4	chr12	lincRNA
ENSG00000213471.8	0	0.09	0.12	0.13	TTLL13P	chr15	unitary_pseudogene	tubulin tyrosine ligase-like family member 13, pseudogene
ENSG00000187735.12	16.97	26.26	30.14	28.57	TCEA1	chr8	protein_coding	transcription elongation factor A (SII), 1
ENSG00000254286.5	0.08	0	0	0.09	RP11-89K10.1	chr8	antisense
ENSG00000232536.1	0.86	0.69	0.36	0.56	RP11-74C1.4	chr1	sense_intronic
ENSG00000174151.14	2.48	2.6	2.82	2.32	CYB561D1	chr1	protein_coding	cytochrome b561 family, member D1
ENSG00000184949.15	0.19	0.07	0.73	0.44	FAM227A	chr22	protein_coding	family with sequence similarity 227, member A
ENSG00000157617.16	2.43	1.47	2.58	2.78	C2CD2	chr21	protein_coding	C2 calcium-dependent domain containing 2
ENSG00000267645.5	1.22	1.4	1.52	0.85	POLR2J2	chr7	protein_coding	polymerase (RNA) II (DNA directed) polypeptide J2
ENSG00000167676.4	0.13	0.07	0.22	0.14	PLIN4	chr19	protein_coding	perilipin 4
ENSG00000224769.1	0	0.22	0	0	AC069213.1	chr3	unprocessed_pseudogene
ENSG00000166483.10	14.89	12.01	18.83	20.13	WEE1	chr11	protein_coding	WEE1 G2 checkpoint kinase
ENSG00000264423.2	0	0	0.25	0	RN7SL718P	chr19	misc_RNA	RNA, 7SL, cytoplasmic 718, pseudogene
ENSG00000142945.12	44.73	44.97	46.45	43.63	KIF2C	chr1	protein_coding	kinesin family member 2C
ENSG00000162104.9	8.48	6.42	8.34	11.15	ADCY9	chr16	protein_coding	adenylate cyclase 9
ENSG00000213139.7	0.63	0.26	1.02	0.8	CRYGS	chr3	protein_coding	crystallin, gamma S
ENSG00000157014.10	17.96	15.97	15.65	17.91	TATDN2	chr3	protein_coding	TatD DNase domain containing 2
ENSG00000166073.8	10	9.47	10.2	11.05	GPR176	chr15	protein_coding	G protein-coupled receptor 176
ENSG00000223356.1	0.1	0.21	1.14	0.67	RP11-66D17.5	chr1	antisense
ENSG00000106992.17	36.75	34.84	25.57	27.86	AK1	chr9	protein_coding	adenylate kinase 1
ENSG00000114349.9	0	0	0	0.03	GNAT1	chr3	protein_coding	guanine nucleotide binding protein (G protein), alpha transducing activity polypeptide 1
ENSG00000183048.11	5.9	5.23	4.03	5.42	SLC25A10	chr17	protein_coding	solute carrier family 25 (mitochondrial carrier; dicarboxylate transporter), member 10
ENSG00000228546.2	1.57	2.8	2.24	0.1	CTA-313A17.3	chr7	unprocessed_pseudogene
ENSG00000270170.1	13.92	17.03	10.07	10.9	NCBP2-AS2	chr3	protein_coding	NCBP2 antisense RNA 2 (head to head)
ENSG00000101470.9	0.83	0.52	0.48	0.13	TNNC2	chr20	protein_coding	troponin C type 2 (fast)
ENSG00000182575.7	0.09	0.17	0.1	0.28	NXPH3	chr17	protein_coding	neurexophilin 3
ENSG00000206888.1	0	0	0	0.34	RNU6-48P	chr1	snRNA	RNA, U6 small nuclear 48, pseudogene
ENSG00000177738.3	3.69	3.13	2.85	4.08	CTD-2201E18.3	chr5	sense_overlapping
ENSG00000257636.6	0.03	0.45	0.03	0.14	RP11-1103G16.1	chr14	antisense
ENSG00000171227.6	1.51	1.39	1.76	1.63	TMEM37	chr2	protein_coding	transmembrane protein 37
ENSG00000139832.4	13.55	11.05	9.63	10.1	RAB20	chr13	protein_coding	RAB20, member RAS oncogene family
ENSG00000178802.17	8.5	6.7	6.11	6.75	MPI	chr15	protein_coding	mannose phosphate isomerase
ENSG00000150093.18	211.33	267.8	356.32	359.36	ITGB1	chr10	protein_coding	integrin, beta 1 (fibronectin receptor, beta polypeptide, antigen CD29 includes MDF2, MSK12)
ENSG00000076716.8	1.56	1.52	1.66	2.43	GPC4	chrX	protein_coding	glypican 4
ENSG00000114841.17	0.17	0.08	0.23	0.26	DNAH1	chr3	protein_coding	dynein, axonemal, heavy chain 1
ENSG00000159251.6	0.18	0.36	0.34	0.41	ACTC1	chr15	protein_coding	actin, alpha, cardiac muscle 1
ENSG00000181029.8	0.13	0.4	0.15	0.24	TRAPPC5	chr19	protein_coding	trafficking protein particle complex 5
ENSG00000227953.6	0	0	0.37	0.07	LINC01341	chr1	processed_transcript	long intergenic non-protein coding RNA 1341
ENSG00000185825.15	133.46	126.17	110.92	104.6	BCAP31	chrX	protein_coding	B-cell receptor-associated protein 31
ENSG00000269293.2	0.34	0.02	0.23	0.46	ZSCAN16-AS1	chr6	antisense	ZSCAN16 antisense RNA 1
ENSG00000102978.12	54.89	54.52	44.6	46.04	POLR2C	chr16	protein_coding	polymerase (RNA) II (DNA directed) polypeptide C, 33kDa
ENSG00000174407.11	0.04	0	0	0	MIR1-1HG	chr20	antisense	MIR1-1 host gene
ENSG00000259645.1	0	0	0	0.68	RP11-253M7.6	chr15	sense_intronic
ENSG00000273958.1	0	0	0.44	0	RP11-219B17.3	chr15	lincRNA
ENSG00000167286.9	0	0	0.27	0	CD3D	chr11	protein_coding	CD3d molecule, delta (CD3-TCR complex)
ENSG00000125482.12	10.21	15.35	15.89	16.16	TTF1	chr9	protein_coding	transcription termination factor, RNA polymerase I
ENSG00000261864.1	1.4	1.33	2.29	2.93	RP11-67A1.2	chr16	processed_transcript
ENSG00000071189.21	0.46	0.81	1.51	1.29	SNX13	chr7	protein_coding	sorting nexin 13
ENSG00000235888.1	0	0	0	0.05	AF064858.8	chr21	lincRNA
ENSG00000134186.11	6.03	7.63	12.59	9.1	PRPF38B	chr1	protein_coding	pre-mRNA processing factor 38B
ENSG00000270175.1	0.35	0.06	0.29	0	RP11-793H13.11	chr12	antisense
ENSG00000225447.1	0	0.12	0	0	RPS15AP10	chr1	processed_pseudogene	ribosomal protein S15a pseudogene 10
ENSG00000273167.1	0.46	0.93	1.76	1.48	RP11-307N16.6	chr13	protein_coding
ENSG00000213638.5	1.17	1.24	0.35	1.35	ADAT3	chr19	protein_coding	adenosine deaminase, tRNA-specific 3
ENSG00000131944.9	5.65	5.9	3.87	4.34	FAAP24	chr19	protein_coding
ENSG00000104442.9	5.41	8.66	9.72	8.47	ARMC1	chr8	protein_coding	armadillo repeat containing 1
ENSG00000198034.10	742.39	795.86	682.99	633.54	RPS4X	chrX	protein_coding	ribosomal protein S4, X-linked
ENSG00000253532.1	0.3	0	0	0	CTD-2340D6.1	chr8	sense_intronic
ENSG00000270558.1	0.77	1.64	0.65	0.76	CTD-2124B8.2	chr5	processed_pseudogene
ENSG00000155026.16	0	0.02	0.03	0.01	RSPH10B	chr7	protein_coding	radial spoke head 10 homolog B (Chlamydomonas)
ENSG00000171488.14	1.74	2.21	1.82	1.79	LRRC8C	chr1	protein_coding	leucine rich repeat containing 8 family, member C
ENSG00000260686.1	0	0.08	0.1	0	CTB-36H16.2	chr5	sense_overlapping
ENSG00000158467.16	2.84	2.65	4.45	4.36	AHCYL2	chr7	protein_coding	adenosylhomocysteinase-like 2
ENSG00000188735.12	3.19	3.02	4.05	3.82	TMEM120B	chr12	protein_coding	transmembrane protein 120B
ENSG00000235627.1	0	0.38	0	0	SNRPFP4	chr3	processed_pseudogene	small nuclear ribonucleoprotein polypeptide F pseudogene 4
ENSG00000172315.5	9.01	9.2	9.7	9.44	TP53RK	chr20	protein_coding	TP53 regulating kinase
ENSG00000153922.10	1.63	2.97	4.06	2.4	CHD1	chr5	protein_coding	chromodomain helicase DNA binding protein 1
ENSG00000204172.11	1.59	1.81	2.94	1.91	AGAP9	chr10	protein_coding	ArfGAP with GTPase domain, ankyrin repeat and PH domain 9
ENSG00000176108.9	12.85	10.47	8.14	7.64	CHMP6	chr17	protein_coding	charged multivesicular body protein 6
ENSG00000117632.20	71.41	98	75.38	79.79	STMN1	chr1	protein_coding	stathmin 1
ENSG00000007202.14	62.79	44.93	53.91	65.67	KIAA0100	chr17	protein_coding	KIAA0100
ENSG00000168806.7	3.25	2.6	2.41	2.38	LCMT2	chr15	protein_coding	leucine carboxyl methyltransferase 2
ENSG00000158104.11	1.32	0.23	0.7	0.6	HPD	chr12	protein_coding	4-hydroxyphenylpyruvate dioxygenase
ENSG00000036672.15	1.92	0.94	1.51	2.47	USP2	chr11	protein_coding	ubiquitin specific peptidase 2
ENSG00000254978.2	0.5	0	0	0	ALG1L9P	chr11	transcribed_unprocessed_pseudogene	asparagine-linked glycosylation 1-like 9, pseudogene
ENSG00000186834.3	28.71	23.01	28.44	29.43	HEXIM1	chr17	protein_coding	hexamethylene bis-acetamide inducible 1
ENSG00000114737.15	2.08	1.7	1.83	2	CISH	chr3	protein_coding	cytokine inducible SH2-containing protein
ENSG00000154832.14	18.66	16.36	12.57	15.15	CXXC1	chr18	protein_coding	CXXC finger protein 1
ENSG00000117360.12	48.9	53.93	48.63	50.69	PRPF3	chr1	protein_coding	pre-mRNA processing factor 3
ENSG00000066044.13	13.57	14.11	12.52	15.51	ELAVL1	chr19	protein_coding	ELAV like RNA binding protein 1
ENSG00000204380.4	0.08	0.02	0	0.01	AC005042.4	chr2	antisense
ENSG00000279456.1	0	0.28	0.05	0.11	RP11-87H9.5	chr9	TEC
ENSG00000266308.2	0	0.17	0	0.42	RN7SL510P	chr15	misc_RNA	RNA, 7SL, cytoplasmic 510, pseudogene
ENSG00000171988.17	2.27	2.8	4.26	2.91	JMJD1C	chr10	protein_coding	jumonji domain containing 1C
ENSG00000204528.3	2.06	3.54	7.7	3.2	PSORS1C3	chr6	sense_intronic	psoriasis susceptibility 1 candidate 3 (non-protein coding)
ENSG00000153531.12	3.74	3.45	2.71	3	ADPRHL1	chr13	protein_coding	ADP-ribosylhydrolase like 1
ENSG00000233585.1	0	0.33	0.19	0.41	AC115617.2	chrX	processed_pseudogene
ENSG00000043093.13	2.38	3.09	4.19	3.35	DCUN1D1	chr3	protein_coding	DCN1, defective in cullin neddylation 1, domain containing 1
ENSG00000278189.1	10.96	0	0	0	RNA5-8S5	chr21	rRNA	RNA, 5.8S ribosomal 5
ENSG00000265018.6	0.81	0.57	1.51	0.78	CTGLF12P	chr10	transcribed_unprocessed_pseudogene	centaurin, gamma-like family, member 12 pseudogene
ENSG00000275092.1	1.44	0.82	0.26	0.4	LA16c-329F2.2	chr16	sense_intronic
ENSG00000099968.17	11.05	10.31	11.83	11.47	BCL2L13	chr22	protein_coding	BCL2-like 13 (apoptosis facilitator)
ENSG00000196636.7	3.7	4.81	3.63	4.83	SDHAF3	chr7	protein_coding	succinate dehydrogenase complex assembly factor 3
ENSG00000272419.5	1.98	0.8	1.87	1.58	RP11-403I13.8	chr1	processed_transcript
ENSG00000130643.8	0	0	0.06	0.07	CALY	chr10	protein_coding	calcyon neuron-specific vesicular protein
ENSG00000186715.10	0.01	0.03	0.06	0.17	MST1L	chr1	transcribed_unprocessed_pseudogene	macrophage stimulating 1-like
ENSG00000111846.15	4.06	4.88	5.92	5.93	GCNT2	chr6	protein_coding	glucosaminyl (N-acetyl) transferase 2, I-branching enzyme (I blood group)
ENSG00000126970.15	0	0.1	0.14	0.02	ZC4H2	chrX	protein_coding	zinc finger, C4H2 domain containing
ENSG00000196110.7	0.42	0.46	0.75	0.97	ZNF699	chr19	protein_coding	zinc finger protein 699
ENSG00000141699.10	13.22	11.69	12.59	16.18	FAM134C	chr17	protein_coding	family with sequence similarity 134, member C
ENSG00000167491.17	21.87	18.14	19.92	22.84	GATAD2A	chr19	protein_coding	GATA zinc finger domain containing 2A
ENSG00000230026.2	0	0.13	0	0	RP11-382D8.5	chr1	processed_pseudogene
ENSG00000119705.9	47.28	54.94	39.38	35.27	SLIRP	chr14	protein_coding	SRA stem-loop interacting RNA binding protein
ENSG00000099365.9	1.22	0.63	0.86	0.86	STX1B	chr16	protein_coding	syntaxin 1B
ENSG00000204003.8	2.47	3.88	2.59	2.08	RP11-216L13.16	chr9	protein_coding
ENSG00000273151.1	0.03	0.01	0.12	0.04	RP11-449P15.2	chr7	antisense
ENSG00000231508.1	0	0	0	0.31	RP11-452K12.6	chr10	processed_pseudogene
ENSG00000134058.10	25.47	30.52	27.47	28.92	CDK7	chr5	protein_coding	cyclin-dependent kinase 7
ENSG00000140832.9	0	0	0	0.01	MARVELD3	chr16	protein_coding	MARVEL domain containing 3
ENSG00000263776.1	0	2.31	6.62	1.06	SNORA4	chr3	snoRNA	small nucleolar RNA, H/ACA box 4
ENSG00000198270.12	1.64	2.06	3.07	2.49	TMEM116	chr12	protein_coding	transmembrane protein 116
ENSG00000276171.1	4.31	0.72	1.21	0.58	AC114498.1	chr1	miRNA
ENSG00000120910.14	5.64	5.36	4.62	5.37	PPP3CC	chr8	protein_coding	protein phosphatase 3, catalytic subunit, gamma isozyme
ENSG00000140553.16	28.44	34.38	24.32	25.51	UNC45A	chr15	protein_coding	unc-45 homolog A (C. elegans)
ENSG00000105879.11	4.69	5.22	8.25	8.1	CBLL1	chr7	protein_coding	Cbl proto-oncogene-like 1, E3 ubiquitin protein ligase
ENSG00000163682.15	562.74	612.16	462.2	400.31	RPL9	chr4	protein_coding	ribosomal protein L9
ENSG00000279613.1	0	0.1	0	0	RP13-638C3.5	chr17	TEC
ENSG00000138709.17	0.6	1.29	1.76	1.56	LARP1B	chr4	protein_coding	La ribonucleoprotein domain family, member 1B
ENSG00000152056.16	0.72	1.04	1.38	0.96	AP1S3	chr2	protein_coding	adaptor-related protein complex 1, sigma 3 subunit
ENSG00000263142.5	0	0.01	0.13	0.15	LRRC37A17P	chr17	transcribed_unprocessed_pseudogene	leucine rich repeat containing 37, member A17, pseudogene
ENSG00000244256.3	0	0.15	0.25	0.24	RN7SL130P	chr1	misc_RNA	RNA, 7SL, cytoplasmic 130, pseudogene
ENSG00000151665.12	3.71	4.85	3.61	3.98	PIGF	chr2	protein_coding	phosphatidylinositol glycan anchor biosynthesis, class F
ENSG00000282508.1	1.18	0.48	1.13	0.41	LINC01002	chr19	processed_transcript	long intergenic non-protein coding RNA 1002
ENSG00000234585.6	0.98	1.2	1.69	1.54	CCT6P3	chr7	transcribed_unprocessed_pseudogene	chaperonin containing TCP1, subunit 6 (zeta) pseudogene 3
ENSG00000179058.6	0	0.03	0	0	C9orf50	chr9	protein_coding	chromosome 9 open reading frame 50
ENSG00000128714.5	0	0.08	0	0	HOXD13	chr2	protein_coding	homeobox D13
ENSG00000155561.14	23.45	24.59	31.67	31.72	NUP205	chr7	protein_coding	nucleoporin 205kDa
ENSG00000182685.7	2.57	1.38	2.14	2.51	BRICD5	chr16	protein_coding	BRICHOS domain containing 5
ENSG00000171105.13	3.65	2.45	3.67	4.57	INSR	chr19	protein_coding	insulin receptor
ENSG00000241255.1	0	0	1.61	0.09	RP1-89D4.1	chr11	processed_pseudogene
ENSG00000081026.18	0.71	0.92	1.04	1.17	MAGI3	chr1	protein_coding	membrane associated guanylate kinase, WW and PDZ domain containing 3
ENSG00000266173.5	6.11	6.72	5	6.03	STRADA	chr17	protein_coding	STE20-related kinase adaptor alpha
ENSG00000213185.6	2.05	0.85	1.32	0.78	FAM24B	chr10	protein_coding	family with sequence similarity 24, member B
ENSG00000076344.15	0.04	0.11	0	0.18	RGS11	chr16	protein_coding	regulator of G-protein signaling 11
ENSG00000225166.1	0	0.44	0	0	AC012462.2	chr2	lincRNA
ENSG00000185697.16	1.39	1.78	3.92	2.75	MYBL1	chr8	protein_coding	v-myb avian myeloblastosis viral oncogene homolog-like 1
ENSG00000177302.14	14.79	14.27	12.93	14.4	TOP3A	chr17	protein_coding	topoisomerase (DNA) III alpha
ENSG00000172548.14	0.11	0	0.07	0	NIPAL4	chr5	protein_coding	NIPA-like domain containing 4
ENSG00000184857.7	8.32	14.17	9.17	8.72	TMEM186	chr16	protein_coding	transmembrane protein 186
ENSG00000130768.14	0.22	0.2	0.22	0.35	SMPDL3B	chr1	protein_coding	sphingomyelin phosphodiesterase, acid-like 3B
ENSG00000146648.15	25.69	29.96	39.85	39.55	EGFR	chr7	protein_coding	epidermal growth factor receptor
ENSG00000063169.10	2.07	1.51	1.54	1.59	GLTSCR1	chr19	protein_coding	glioma tumor suppressor candidate region gene 1
ENSG00000138231.12	9.79	10.5	9.65	9.64	DBR1	chr3	protein_coding	debranching RNA lariats 1
ENSG00000255275.3	3.35	3.39	2.21	3.12	RP13-279N23.2	chr1	protein_coding
ENSG00000232600.3	0	0.32	0	0	TONSL-AS1	chr8	antisense	TONSL antisense RNA 1
ENSG00000134717.17	9.93	12.09	14.2	11.24	BTF3L4	chr1	protein_coding	basic transcription factor 3-like 4
ENSG00000172382.9	2.49	2.62	1.28	1.39	PRSS27	chr16	protein_coding	protease, serine 27
ENSG00000104518.10	4.1	2.69	2.93	2.68	GSDMD	chr8	protein_coding	gasdermin D
ENSG00000261526.2	0.56	0.77	1.03	0.96	CTB-31O20.2	chr19	lincRNA
ENSG00000120942.13	5.44	5.08	4.48	4.9	UBIAD1	chr1	protein_coding	UbiA prenyltransferase domain containing 1
ENSG00000232940.5	0	0.18	0.46	0.11	HCG25	chr6	antisense	HLA complex group 25 (non-protein coding)
ENSG00000178502.5	1.01	0.44	1.53	1.99	KLHL11	chr17	protein_coding	kelch-like family member 11
ENSG00000274001.1	0	0	0	0.08	RP11-5G9.5	chr13	sense_intronic
ENSG00000170954.11	0	0	0	0.01	ZNF415	chr19	protein_coding	zinc finger protein 415
ENSG00000106524.8	7.15	9.68	11.45	10.95	ANKMY2	chr7	protein_coding	ankyrin repeat and MYND domain containing 2
ENSG00000267332.1	0.14	0	0	0	BOLA3P2	chr19	processed_pseudogene	bolA family member 3 pseudogene 2
ENSG00000166863.11	0	0.22	0.09	0.12	TAC3	chr12	protein_coding	tachykinin 3
ENSG00000229751.1	0	0.24	0	0	RP11-142M10.2	chr10	antisense
ENSG00000223959.8	2.67	1.96	2.94	3.13	AFG3L1P	chr16	unitary_pseudogene	AFG3-like AAA ATPase 1, pseudogene
ENSG00000280483.1	0	0	0	0.63	AC022098.1	chr19	miRNA
ENSG00000115091.11	40.98	50.39	55.71	52.06	ACTR3	chr2	protein_coding	ARP3 actin-related protein 3 homolog (yeast)
ENSG00000189280.3	7.62	9.22	4.1	6.04	GJB5	chr1	protein_coding	gap junction protein, beta 5, 31.1kDa
ENSG00000183605.16	12.9	14.72	12.51	10.5	SFXN4	chr10	protein_coding	sideroflexin 4
ENSG00000235670.1	0	0	0	0.45	RPL21P40	chr3	processed_pseudogene	ribosomal protein L21 pseudogene 40
ENSG00000152256.13	1.83	2.45	3.68	2.98	PDK1	chr2	protein_coding	pyruvate dehydrogenase kinase, isozyme 1
ENSG00000263033.2	0	0	0	0.03	RP11-396B14.2	chr16	lincRNA
ENSG00000100711.13	22.91	24.28	23.82	22.8	ZFYVE21	chr14	protein_coding	zinc finger, FYVE domain containing 21
ENSG00000099910.16	4.47	4.18	2.56	3.38	KLHL22	chr22	protein_coding	kelch-like family member 22
ENSG00000125414.18	0	0.04	0.07	0.02	MYH2	chr17	protein_coding	myosin, heavy chain 2, skeletal muscle, adult
ENSG00000112787.12	6.59	4.4	4.98	5.23	FBRSL1	chr12	protein_coding	fibrosin-like 1
ENSG00000141127.14	15.71	16.33	18.16	15.51	PRPSAP2	chr17	protein_coding	phosphoribosyl pyrophosphate synthetase-associated protein 2
ENSG00000273143.1	6.13	7.84	4.06	3.02	RP11-525A16.4	chr10	lincRNA
ENSG00000203760.8	27.24	31.88	27.81	22.6	CENPW	chr6	protein_coding	centromere protein W
ENSG00000258640.3	0	0	0	0.15	RPL21P5	chr14	processed_pseudogene	ribosomal protein L21 pseudogene 5
ENSG00000203880.11	2.39	1.97	5.04	5.06	PCMTD2	chr20	protein_coding	protein-L-isoaspartate (D-aspartate) O-methyltransferase domain containing 2
ENSG00000223404.3	0.5	0	0	0	LINC00397	chr13	lincRNA	long intergenic non-protein coding RNA 397
ENSG00000170185.9	0.8	1.09	1.59	1.29	USP38	chr4	protein_coding	ubiquitin specific peptidase 38
ENSG00000133773.11	9.39	13.59	13.11	12.43	CCDC59	chr12	protein_coding	coiled-coil domain containing 59
ENSG00000171970.12	2.05	1.76	2.49	2.34	ZNF57	chr19	protein_coding	zinc finger protein 57
ENSG00000164778.4	0.92	0.46	0.48	0.56	EN2	chr7	protein_coding	engrailed homeobox 2
ENSG00000185986.11	6.84	4.31	6.81	5.04	SDHAP3	chr5	transcribed_unprocessed_pseudogene	succinate dehydrogenase complex, subunit A, flavoprotein pseudogene 3
ENSG00000137871.19	0.62	0.85	0.96	0.8	ZNF280D	chr15	protein_coding	zinc finger protein 280D
ENSG00000101266.16	25.18	25.26	28.25	31.57	CSNK2A1	chr20	protein_coding	casein kinase 2, alpha 1 polypeptide
ENSG00000278952.1	0	0	0	0.05	RP11-399J13.2	chr11	TEC
ENSG00000257859.1	0	0	0	0.13	CASC18	chr12	lincRNA	cancer susceptibility candidate 18 (non-protein coding)
ENSG00000064995.16	23.03	22.04	26.06	20.61	TAF11	chr6	protein_coding	TAF11 RNA polymerase II, TATA box binding protein (TBP)-associated factor, 28kDa
ENSG00000134987.11	2.82	4.19	7.33	5.3	WDR36	chr5	protein_coding	WD repeat domain 36
ENSG00000140285.9	0.15	0.06	0.05	0	FGF7	chr15	protein_coding	fibroblast growth factor 7
ENSG00000224546.2	0.02	0.02	0	0	EIF4BP3	chr9	processed_pseudogene	eukaryotic translation initiation factor 4B pseudogene 3
ENSG00000138735.15	0	0.09	0.37	0.21	PDE5A	chr4	protein_coding	phosphodiesterase 5A, cGMP-specific
ENSG00000134201.10	0	0	0	0.02	GSTM5	chr1	protein_coding	glutathione S-transferase mu 5
ENSG00000154118.12	6.9	4.77	4.48	4.87	JPH3	chr16	protein_coding	junctophilin 3
ENSG00000273416.1	0	0.11	0	0	RP4-597N16.4	chr1	lincRNA
ENSG00000176160.9	0	0	0.08	0	HSF5	chr17	protein_coding	heat shock transcription factor family member 5
ENSG00000221955.10	0.82	0.33	0.64	1.2	SLC12A8	chr3	protein_coding	solute carrier family 12, member 8
ENSG00000131484.4	0	0	0.49	0.13	RP11-798G7.5	chr17	antisense
ENSG00000154608.13	0.04	0.06	0.1	0.18	CEP170P1	chr4	transcribed_unprocessed_pseudogene	centrosomal protein 170kDa pseudogene 1
ENSG00000166246.13	0.03	0.36	0.22	0.09	C16orf71	chr16	protein_coding	chromosome 16 open reading frame 71
ENSG00000169299.13	8.46	12.11	12.35	9.95	PGM2	chr4	protein_coding	phosphoglucomutase 2
ENSG00000278861.1	0	0	0.19	0	RP11-338K17.6	chr12	TEC
ENSG00000213762.10	1.8	2.1	2.59	2.88	ZNF134	chr19	protein_coding	zinc finger protein 134
ENSG00000125508.3	2.33	1.5	1.03	1.54	SRMS	chr20	protein_coding	src-related kinase lacking C-terminal regulatory tyrosine and N-terminal myristylation sites
ENSG00000165501.16	10.72	10.03	8.77	8.26	LRR1	chr14	protein_coding	leucine rich repeat protein 1
ENSG00000106263.17	206.9	192.68	183.08	184.1	EIF3B	chr7	protein_coding	eukaryotic translation initiation factor 3, subunit B
ENSG00000166762.16	0.25	0.36	0.98	0.23	CATSPER2	chr15	protein_coding	cation channel, sperm associated 2
ENSG00000143344.15	0.08	0.01	0.09	0.12	RGL1	chr1	protein_coding	ral guanine nucleotide dissociation stimulator-like 1
ENSG00000132386.10	0	0.06	0	0.02	SERPINF1	chr17	protein_coding	serpin peptidase inhibitor, clade F (alpha-2 antiplasmin, pigment epithelium derived factor), member 1
ENSG00000169508.6	0	0	0	0.02	GPR183	chr13	protein_coding	G protein-coupled receptor 183
ENSG00000063438.16	12.76	8.42	12.14	13.98	AHRR	chr5	protein_coding	aryl-hydrocarbon receptor repressor
ENSG00000168090.9	176.26	198.31	147.19	131.69	COPS6	chr7	protein_coding	COP9 signalosome subunit 6
ENSG00000003393.14	1.35	1.76	2.13	2.27	ALS2	chr2	protein_coding	amyotrophic lateral sclerosis 2 (juvenile)
ENSG00000169246.16	1.1	0.57	1.38	1.17	NPIPB3	chr16	protein_coding	nuclear pore complex interacting protein family, member B3
ENSG00000119720.17	0.86	0.73	0.63	1.12	NRDE2	chr14	protein_coding	NRDE-2, necessary for RNA interference, domain containing
ENSG00000114480.12	18.55	17.69	23	24.36	GBE1	chr3	protein_coding	glucan (1,4-alpha-), branching enzyme 1
ENSG00000265600.1	0	0.91	0.38	1.1	AC006480.1	chr7	miRNA
ENSG00000267030.1	0.42	0.76	1.06	1.62	CTB-50L17.7	chr19	antisense
ENSG00000204267.13	6.39	6	7.34	7.63	TAP2	chr6	protein_coding	transporter 2, ATP-binding cassette, sub-family B (MDR/TAP)
ENSG00000133794.17	4.13	4.55	6	7	ARNTL	chr11	protein_coding	aryl hydrocarbon receptor nuclear translocator-like
ENSG00000116514.16	14.08	17.82	12.32	15.64	RNF19B	chr1	protein_coding	ring finger protein 19B
ENSG00000254486.1	0	0	0	0.02	RP13-631K18.2	chr11	lincRNA
ENSG00000257761.1	0	0	0.07	0	RP11-186F10.2	chr12	antisense
ENSG00000132481.6	34.95	36.09	25.61	28.7	TRIM47	chr17	protein_coding	tripartite motif containing 47
ENSG00000197261.11	0	0	0.1	0	C6orf141	chr6	protein_coding	chromosome 6 open reading frame 141
ENSG00000129933.20	9.56	6.97	6.83	7.38	MAU2	chr19	protein_coding	MAU2 sister chromatid cohesion factor
ENSG00000131724.10	16.95	20.64	25.48	26.13	IL13RA1	chrX	protein_coding	interleukin 13 receptor, alpha 1
ENSG00000131475.6	84.77	109.44	68.5	61.58	VPS25	chr17	protein_coding	vacuolar protein sorting 25 homolog (S. cerevisiae)
ENSG00000153093.18	0	0	0	0.02	ACOXL	chr2	protein_coding	acyl-CoA oxidase-like
ENSG00000214832.5	0	0	0.13	0	UPF3AP2	chr17	transcribed_processed_pseudogene	UPF3A pseudogene 2
ENSG00000255292.6	0.71	0	0	0	AP002884.2	chr11	protein_coding
ENSG00000106305.9	53.11	55.27	46.35	43.54	AIMP2	chr7	protein_coding	aminoacyl tRNA synthetase complex-interacting multifunctional protein 2
ENSG00000108448.20	14.36	13.73	14.11	13.95	TRIM16L	chr17	protein_coding	tripartite motif containing 16-like
ENSG00000157426.13	1.17	1.23	1.22	0.89	AASDH	chr4	protein_coding	aminoadipate-semialdehyde dehydrogenase
ENSG00000170577.7	9.66	9.55	4.81	6.56	SIX2	chr2	protein_coding	SIX homeobox 2
ENSG00000065308.4	20.63	12.27	17.58	22.7	TRAM2	chr6	protein_coding	translocation associated membrane protein 2
ENSG00000104723.20	11.38	12.42	13.21	13.04	TUSC3	chr8	protein_coding	tumor suppressor candidate 3
ENSG00000135469.13	3.99	2.28	3.06	4	COQ10A	chr12	protein_coding	coenzyme Q10 homolog A (S. cerevisiae)
ENSG00000255893.1	0	0.63	0.59	0.25	RP11-685N10.1	chr11	antisense
ENSG00000106692.13	1.22	2.31	2.78	2.16	FKTN	chr9	protein_coding	fukutin
ENSG00000057757.9	17.17	15.37	13.38	15.28	PITHD1	chr1	protein_coding	PITH (C-terminal proteasome-interacting domain of thioredoxin-like) domain containing 1
ENSG00000235733.2	0.24	0	0	0	RP3-522P13.3	chr6	antisense
ENSG00000251281.1	1.39	2.9	2.15	2.15	CTD-2066L21.2	chr5	lincRNA
ENSG00000124557.12	0	0	0	0.01	BTN1A1	chr6	protein_coding	butyrophilin, subfamily 1, member A1
ENSG00000150672.16	0.03	0.04	0.04	0.06	DLG2	chr11	protein_coding	discs, large homolog 2 (Drosophila)
ENSG00000122034.12	45.01	56.53	44.88	34.93	GTF3A	chr13	protein_coding	general transcription factor IIIA
ENSG00000100379.17	6.8	7.38	6.18	5.09	KCTD17	chr22	protein_coding	potassium channel tetramerization domain containing 17
ENSG00000257553.1	0	0	0.09	0.34	RP11-603J24.17	chr12	antisense
ENSG00000134042.12	0.03	0	0.02	0	MRO	chr18	protein_coding	maestro
ENSG00000170946.14	3.28	6.98	5.68	6.7	DNAJC24	chr11	protein_coding	DnaJ (Hsp40) homolog, subfamily C, member 24
ENSG00000198482.10	0.71	0.26	1.22	0.67	ZNF808	chr19	protein_coding	zinc finger protein 808
ENSG00000066056.13	0	0	0	0.02	TIE1	chr1	protein_coding	tyrosine kinase with immunoglobulin-like and EGF-like domains 1
ENSG00000187688.14	0.05	0.31	0	0.44	TRPV2	chr17	protein_coding	transient receptor potential cation channel, subfamily V, member 2
ENSG00000225914.1	0.77	0.22	0.69	0.29	XXbac-BPG154L12.4	chr6	antisense
ENSG00000135932.10	13.58	21.29	27.23	25.35	CAB39	chr2	protein_coding	calcium binding protein 39
ENSG00000171517.5	0	0	0.02	0	LPAR3	chr1	protein_coding	lysophosphatidic acid receptor 3
ENSG00000144655.14	23.1	19.02	13.65	17.02	CSRNP1	chr3	protein_coding	cysteine-serine-rich nuclear protein 1
ENSG00000267287.1	0.08	0	0	0	RP11-567M16.1	chr18	processed_transcript
ENSG00000213030.5	0.46	0.67	0.73	0.75	CGB8	chr19	protein_coding	chorionic gonadotropin, beta polypeptide 8
ENSG00000279838.1	0.11	0	0.08	0.04	RP4-635A23.6	chr1	TEC
ENSG00000171311.12	40.45	50.78	34.88	29.94	EXOSC1	chr10	protein_coding	exosome component 1
ENSG00000156990.14	38.69	30.63	22.56	28.71	RPUSD3	chr3	protein_coding	RNA pseudouridylate synthase domain containing 3
ENSG00000238578.1	1.26	1.27	3.17	1.52	SNORD4A	chr17	snoRNA	small nucleolar RNA, C/D box 4A
ENSG00000255343.1	0.57	0.29	0.48	0.23	RP11-299M14.2	chr8	3prime_overlapping_ncrna
ENSG00000109667.11	0.11	0	0.07	0	SLC2A9	chr4	protein_coding	solute carrier family 2 (facilitated glucose transporter), member 9
ENSG00000159197.3	0	0	0.07	0.35	KCNE2	chr21	protein_coding	potassium channel, voltage gated subfamily E regulatory beta subunit 2
ENSG00000121316.10	1.87	2.65	2.7	2.38	PLBD1	chr12	protein_coding	phospholipase B domain containing 1
ENSG00000271443.1	0	0	0.22	0	RP11-541E12.1	chr2	transcribed_processed_pseudogene
ENSG00000242299.1	12.54	12.52	12.35	10.1	RP11-234A1.1	chr3	processed_pseudogene
ENSG00000157554.18	0.47	0.4	0.23	0.24	ERG	chr21	protein_coding	v-ets avian erythroblastosis virus E26 oncogene homolog
ENSG00000259556.2	0	0	0.29	0.18	RP11-56B16.2	chr15	unprocessed_pseudogene
ENSG00000253227.1	1.47	2.8	1.51	2.77	RP11-383J24.1	chr8	lincRNA
ENSG00000237803.5	0.06	0.08	0	0.02	LINC00211	chr2	lincRNA	long intergenic non-protein coding RNA 211
ENSG00000207922.1	0.96	0	0	0	MIR566	chr3	miRNA	microRNA 566
ENSG00000103495.13	103.24	91.28	71.57	86.48	MAZ	chr16	protein_coding	MYC-associated zinc finger protein (purine-binding transcription factor)
ENSG00000163714.17	9.34	15.02	22.83	16.6	U2SURP	chr3	protein_coding	U2 snRNP-associated SURP domain containing
ENSG00000100314.3	0	0	0	0.04	CABP7	chr22	protein_coding	calcium binding protein 7
ENSG00000112759.16	76.69	65	56.11	59.46	SLC29A1	chr6	protein_coding	solute carrier family 29 (equilibrative nucleoside transporter), member 1
ENSG00000180346.3	0.99	0.99	2.53	2.33	TIGD2	chr4	protein_coding	tigger transposable element derived 2
ENSG00000068697.6	82.42	80.8	90.08	90.59	LAPTM4A	chr2	protein_coding	lysosomal protein transmembrane 4 alpha
ENSG00000281041.2	0	0	0	0.05	RP11-470E16.2	chr1	lincRNA
ENSG00000139168.7	21.57	24.08	22.39	25.7	ZCRB1	chr12	protein_coding	zinc finger CCHC-type and RNA binding motif 1
ENSG00000240463.1	0.1	0	0	0	RPS19P3	chr14	processed_pseudogene	ribosomal protein S19 pseudogene 3
ENSG00000197696.9	2.35	2.14	1.41	1.93	NMB	chr15	protein_coding	neuromedin B
ENSG00000281531.1	0	0	0.13	0	Metazoa_SRP	chr10	misc_RNA
ENSG00000176236.6	0	0.03	0.11	0.04	C10orf111	chr10	antisense	chromosome 10 open reading frame 111
ENSG00000203797.9	0	0.13	0	0.07	DDO	chr6	protein_coding	D-aspartate oxidase
ENSG00000278022.1	0	0	0.08	0.4	RP11-35O15.2	chr15	sense_intronic
ENSG00000072135.12	4.12	5.31	5.52	5.25	PTPN18	chr2	protein_coding	protein tyrosine phosphatase, non-receptor type 18 (brain-derived)
ENSG00000197561.6	0.09	0	0	0.07	ELANE	chr19	protein_coding	elastase, neutrophil expressed
ENSG00000112984.11	38.24	34.15	36.97	41.21	KIF20A	chr5	protein_coding	kinesin family member 20A
ENSG00000187790.10	0.52	0.59	0.48	0.4	FANCM	chr14	protein_coding	Fanconi anemia, complementation group M
ENSG00000270964.1	0.24	0.57	0.12	0.4	RP11-502I4.3	chr15	lincRNA
ENSG00000235672.1	0	0	0.39	0.06	AC090286.2	chr17	transcribed_processed_pseudogene
ENSG00000244144.1	0.17	0.26	0.29	0	RP11-757F18.3	chr3	processed_pseudogene
ENSG00000106608.16	12.24	10	7.95	9.24	URGCP	chr7	protein_coding	upregulator of cell proliferation
ENSG00000198663.16	15.36	11.02	14.24	17.57	C6orf89	chr6	protein_coding	chromosome 6 open reading frame 89
ENSG00000121101.15	0	0.26	0.24	0.13	TEX14	chr17	protein_coding	testis expressed 14
ENSG00000101945.16	16.82	18.17	13.07	14.88	SUV39H1	chrX	protein_coding	suppressor of variegation 3-9 homolog 1 (Drosophila)
ENSG00000181220.15	2.77	2.32	1.72	2.59	ZNF746	chr7	protein_coding	zinc finger protein 746
ENSG00000238344.1	0	0.59	0	0	SNORD126	chr14	snoRNA	small nucleolar RNA, C/D box 126
ENSG00000160113.5	29.29	31.08	25.66	31.65	NR2F6	chr19	protein_coding	nuclear receptor subfamily 2, group F, member 6
ENSG00000254860.5	1.46	0.61	1.99	0.38	TMEM9B-AS1	chr11	antisense	TMEM9B antisense RNA 1
ENSG00000254038.1	0	0	0	0.57	RP11-419C23.1	chr8	lincRNA
ENSG00000140104.13	4.17	3.19	3.35	3.68	C14orf79	chr14	protein_coding	chromosome 14 open reading frame 79
ENSG00000227297.1	0	0	0	0.04	RP4-718J7.4	chr20	lincRNA
ENSG00000258555.4	0.13	0.07	0.13	0.14	SPECC1L-ADORA2A	chr22	protein_coding	SPECC1L-ADORA2A readthrough (NMD candidate)
ENSG00000119574.12	2.07	1.93	1.7	2.88	ZBTB45	chr19	protein_coding	zinc finger and BTB domain containing 45
ENSG00000162520.14	5.44	4.31	5.04	5.68	SYNC	chr1	protein_coding	syncoilin, intermediate filament protein
ENSG00000050165.17	2.23	2.56	1.9	1.56	DKK3	chr11	protein_coding	dickkopf WNT signaling pathway inhibitor 3
ENSG00000198826.10	6.06	8.75	11.08	11.36	ARHGAP11A	chr15	protein_coding	Rho GTPase activating protein 11A
ENSG00000066230.10	0.18	0.11	0.43	0.08	SLC9A3	chr5	protein_coding	solute carrier family 9, subfamily A (NHE3, cation proton antiporter 3), member 3
ENSG00000196862.9	0	0.01	0.01	0	RGPD4	chr2	protein_coding	RANBP2-like and GRIP domain containing 4
ENSG00000086827.8	8.74	12.33	14.21	14.39	ZW10	chr11	protein_coding	zw10 kinetochore protein
ENSG00000198556.13	1.02	1.13	2.61	2.03	ZNF789	chr7	protein_coding	zinc finger protein 789
ENSG00000145545.11	10.19	12.33	14.05	14.47	SRD5A1	chr5	protein_coding	steroid-5-alpha-reductase, alpha polypeptide 1 (3-oxo-5 alpha-steroid delta 4-dehydrogenase alpha 1)
ENSG00000248223.1	0	0	0.09	0	CTD-2139B15.2	chr5	lincRNA
ENSG00000279591.1	0.37	0	0	0.08	AC002044.1	chr16	TEC
ENSG00000165832.5	4.88	9.14	12.42	9.01	TRUB1	chr10	protein_coding	TruB pseudouridine (psi) synthase family member 1
ENSG00000178607.15	1.14	0.69	0.99	1.22	ERN1	chr17	protein_coding	endoplasmic reticulum to nucleus signaling 1
ENSG00000175344.16	0.05	0.09	0.01	0	CHRNA7	chr15	protein_coding	cholinergic receptor, nicotinic, alpha 7 (neuronal)
ENSG00000208023.2	0	0	0.35	0	MIR185	chr22	miRNA	microRNA 185
ENSG00000017260.19	16.83	17.61	26.29	26.93	ATP2C1	chr3	protein_coding	ATPase, Ca++ transporting, type 2C, member 1
ENSG00000054611.13	6.67	4.47	5.96	5.34	TBC1D22A	chr22	protein_coding	TBC1 domain family, member 22A
ENSG00000151553.14	2.74	2.57	5.66	3.98	FAM160B1	chr10	protein_coding	family with sequence similarity 160, member B1
ENSG00000238113.6	0	0	0	0.1	LINC01410	chr9	lincRNA	long intergenic non-protein coding RNA 1410
ENSG00000127578.6	9.96	8.54	7.26	7.89	WFIKKN1	chr16	protein_coding	WAP, follistatin/kazal, immunoglobulin, kunitz and netrin domain containing 1
ENSG00000273056.1	0.23	0.16	0	0	RP11-77E14.2	chr9	lincRNA
ENSG00000134874.17	0.51	0.81	1.2	1.1	DZIP1	chr13	protein_coding	DAZ interacting zinc finger protein 1
ENSG00000137492.7	7.44	12.7	18.4	14.43	PRKRIR	chr11	protein_coding	protein-kinase, interferon-inducible double stranded RNA dependent inhibitor, repressor of (P58 repressor)
ENSG00000142065.13	0.28	0.33	0.74	0.48	ZFP14	chr19	protein_coding	ZFP14 zinc finger protein
ENSG00000037749.11	5.08	6.02	9.47	7.33	MFAP3	chr5	protein_coding	microfibrillar-associated protein 3
ENSG00000273619.1	1.56	1.23	0.51	1.8	RP5-908M14.9	chr20	antisense
ENSG00000228110.4	0	0	0.03	0	ST13P19	chr1	processed_pseudogene	suppression of tumorigenicity 13 (colon carcinoma) (Hsp70 interacting protein) pseudogene 19
ENSG00000100804.18	96.15	120.05	76.57	74.72	PSMB5	chr14	protein_coding	proteasome (prosome, macropain) subunit, beta type, 5
ENSG00000128872.9	0.02	0	0.1	0.1	TMOD2	chr15	protein_coding	tropomodulin 2 (neuronal)
ENSG00000198954.6	12	15.45	15.17	14.67	KIF1BP	chr10	protein_coding	KIF1 binding protein
ENSG00000184831.13	13.86	18.43	14.33	13.78	APOO	chrX	protein_coding	apolipoprotein O
ENSG00000101000.4	47.93	46.67	40.9	43.09	PROCR	chr20	protein_coding	protein C receptor, endothelial
ENSG00000213513.3	0.56	0.03	0.17	0.28	RP13-39P12.2	chr10	processed_pseudogene
ENSG00000139985.6	0.1	0.02	0.3	0.1	ADAM21	chr14	protein_coding	ADAM metallopeptidase domain 21
ENSG00000144596.11	0.18	0.07	0.09	0.35	GRIP2	chr3	protein_coding	glutamate receptor interacting protein 2
ENSG00000154330.12	1.1	0.83	1	1.17	PGM5	chr9	protein_coding	phosphoglucomutase 5
ENSG00000231133.6	0.23	0.12	0	0	HAR1B	chr20	lincRNA	highly accelerated region 1B (non-protein coding)
ENSG00000163701.18	1.45	1.07	1.25	1.28	IL17RE	chr3	protein_coding	interleukin 17 receptor E
ENSG00000180822.11	2.89	2.81	1.94	2.44	PSMG4	chr6	protein_coding	proteasome (prosome, macropain) assembly chaperone 4
ENSG00000198722.12	5.78	3.65	4.23	4.52	UNC13B	chr9	protein_coding	unc-13 homolog B (C. elegans)
ENSG00000123643.12	3.44	2.45	2.2	2.86	SLC36A1	chr5	protein_coding	solute carrier family 36 (proton/amino acid symporter), member 1
ENSG00000173264.13	16.84	13.57	9.02	12.39	GPR137	chr11	protein_coding	G protein-coupled receptor 137
ENSG00000134490.13	3.92	3.14	4.11	3.77	TMEM241	chr18	protein_coding	transmembrane protein 241
ENSG00000226699.1	0	0.5	0.83	0.2	RP11-122K13.7	chr10	antisense
ENSG00000064607.16	11.62	9.25	11.83	12.25	SUGP2	chr19	protein_coding	SURP and G patch domain containing 2
ENSG00000231073.1	0	0	0	0.2	RP11-316M1.3	chr1	antisense
ENSG00000165457.13	0.31	0.38	0.09	0.28	FOLR2	chr11	protein_coding	folate receptor 2 (fetal)
ENSG00000109066.13	5.51	3.51	3.84	4.57	TMEM104	chr17	protein_coding	transmembrane protein 104
ENSG00000280006.1	1.43	0.24	2.9	1.53	AC009060.2	chr16	protein_coding
ENSG00000171735.18	2.41	2.63	1.83	2.05	CAMTA1	chr1	protein_coding	calmodulin binding transcription activator 1
ENSG00000166685.11	11.28	9.3	6.44	6.94	COG1	chr17	protein_coding	component of oligomeric golgi complex 1
ENSG00000085552.16	0	0	0.08	0.03	IGSF9	chr1	protein_coding	immunoglobulin superfamily, member 9
ENSG00000129437.9	0	0	0.16	0.25	KLK14	chr19	protein_coding	kallikrein-related peptidase 14
ENSG00000152207.7	0	0	0	0.03	CYSLTR2	chr13	protein_coding	cysteinyl leukotriene receptor 2
ENSG00000231887.6	1.63	1.83	1.29	2.03	PRH1	chr12	protein_coding	proline-rich protein HaeIII subfamily 1
ENSG00000140398.13	0.23	0.12	0.14	0.05	NEIL1	chr15	protein_coding	nei endonuclease VIII-like 1 (E. coli)
ENSG00000281406.1	0.08	0	0	0.02	BLACAT1	chr1	lincRNA	bladder cancer associated transcript 1 (non-protein coding)
ENSG00000030066.13	28.53	36.1	45.72	46.87	NUP160	chr11	protein_coding	nucleoporin 160kDa
ENSG00000146453.12	0.02	0.12	0.43	0.24	PNLDC1	chr6	protein_coding	poly(A)-specific ribonuclease (PARN)-like domain containing 1
ENSG00000170340.10	6.45	7.25	7.37	9.02	B3GNT2	chr2	protein_coding	UDP-GlcNAc:betaGal beta-1,3-N-acetylglucosaminyltransferase 2
ENSG00000156671.12	3.46	4.74	6.71	6.57	SAMD8	chr10	protein_coding	sterile alpha motif domain containing 8
ENSG00000196376.10	0	0	0	0.02	SLC35F1	chr6	protein_coding	solute carrier family 35, member F1
ENSG00000135052.16	55.79	57.83	65.13	71.79	GOLM1	chr9	protein_coding	golgi membrane protein 1
ENSG00000260955.2	0	0	0.09	0.33	RP11-30L15.6	chr8	lincRNA
ENSG00000176390.11	4	4.98	6.09	6.74	CRLF3	chr17	protein_coding	cytokine receptor-like factor 3
ENSG00000100058.12	12.2	10.42	7.93	8.49	CRYBB2P1	chr22	transcribed_unprocessed_pseudogene	crystallin, beta B2 pseudogene 1
ENSG00000139921.12	6.92	11.69	15.75	13.05	TMX1	chr14	protein_coding	thioredoxin-related transmembrane protein 1
ENSG00000136867.10	4.39	3.45	2	3.76	SLC31A2	chr9	protein_coding	solute carrier family 31 (copper transporter), member 2
ENSG00000185345.18	0.02	0	0	0	PARK2	chr6	protein_coding	parkin RBR E3 ubiquitin protein ligase
ENSG00000100263.13	10	7.04	4.88	6.04	RHBDD3	chr22	protein_coding	rhomboid domain containing 3
ENSG00000250264.1	29.98	23.34	22.78	25.86	XXbac-BPG246D15.9	chr6	protein_coding
ENSG00000206337.10	2.15	2.16	2.12	2.28	HCP5	chr6	sense_overlapping	HLA complex P5 (non-protein coding)
ENSG00000272779.1	8.2	7.56	8.83	8.11	LL22NC03-80A10.6	chr22	transcribed_unprocessed_pseudogene
ENSG00000103550.13	11.92	13.03	11.92	13.92	KNOP1	chr16	protein_coding	lysine-rich nucleolar protein 1
ENSG00000185272.13	0.09	0	0	0	RBM11	chr21	protein_coding	RNA binding motif protein 11
ENSG00000238273.3	0.02	0	0.38	0.1	AC012360.6	chr2	antisense
ENSG00000276900.1	0.89	0.55	0.84	1.15	RP11-467L13.7	chr12	antisense
ENSG00000154639.18	1.58	2.72	5.37	4.05	CXADR	chr21	protein_coding	coxsackie virus and adenovirus receptor
ENSG00000213344.2	0	0.29	0.57	0	PCNPP3	chr12	processed_pseudogene	PEST containing nuclear protein pseudogene 3
ENSG00000213279.2	0	0.17	0.19	0.02	RP1-29C18.9	chr22	lincRNA
ENSG00000197757.7	3.76	3.72	4.12	4.6	HOXC6	chr12	protein_coding	homeobox C6
ENSG00000112592.12	6.6	7.77	7.54	8.23	TBP	chr6	protein_coding	TATA box binding protein
ENSG00000120907.17	0	0	0	0.03	ADRA1A	chr8	protein_coding	adrenoceptor alpha 1A
ENSG00000260836.1	1.49	0.36	1.73	0.87	RP11-152F13.10	chr15	protein_coding
ENSG00000256588.1	0	0	0.12	0.06	RP11-613F22.8	chr11	sense_intronic
ENSG00000114251.13	4.33	3.74	8.09	7.71	WNT5A	chr3	protein_coding	wingless-type MMTV integration site family, member 5A
ENSG00000042062.11	0	0.05	0.04	0.05	FAM65C	chr20	protein_coding	family with sequence similarity 65, member C
ENSG00000166387.11	0.6	0.39	0.52	0.43	PPFIBP2	chr11	protein_coding	PTPRF interacting protein, binding protein 2 (liprin beta 2)
ENSG00000205334.2	0.08	0	0.08	0.17	LINC01460	chr2	lincRNA	long intergenic non-protein coding RNA 1460
ENSG00000140694.16	10.24	12.33	11.02	11.86	PARN	chr16	protein_coding	poly(A)-specific ribonuclease
ENSG00000125656.8	63.65	67.23	45.29	46.75	CLPP	chr19	protein_coding	caseinolytic mitochondrial matrix peptidase proteolytic subunit
ENSG00000274444.1	0	0	0	0.09	RP11-128A17.2	chr15	lincRNA
ENSG00000108384.14	5.95	7.72	6.44	6.3	RAD51C	chr17	protein_coding	RAD51 paralog C
ENSG00000260774.1	0.27	0.36	0.87	0.35	CTD-2083E4.4	chr5	processed_transcript
ENSG00000131931.8	2.96	4.41	4.01	4.19	THAP1	chr8	protein_coding	THAP domain containing, apoptosis associated protein 1
ENSG00000208036.1	0	0	0	0.45	MIR106B	chr7	miRNA	microRNA 106b
ENSG00000137571.10	0.05	0.04	0.02	0.09	SLCO5A1	chr8	protein_coding	solute carrier organic anion transporter family, member 5A1
ENSG00000198673.10	0	0.01	0	0	FAM19A2	chr12	protein_coding	family with sequence similarity 19 (chemokine (C-C motif)-like), member A2
ENSG00000204438.10	25.55	26.15	17.5	17.43	GPANK1	chr6	protein_coding	G patch domain and ankyrin repeats 1
ENSG00000143458.11	1.36	2.16	2.9	3.11	GABPB2	chr1	protein_coding	GA binding protein transcription factor, beta subunit 2
ENSG00000179611.3	0	0	0.08	0	DGKZP1	chr13	processed_pseudogene	diacylglycerol kinase, zeta pseudogene 1
ENSG00000198198.13	3.85	2.13	2.8	3.26	SZT2	chr1	protein_coding	seizure threshold 2 homolog (mouse)
ENSG00000278588.1	1.9	3.47	2.5	2.97	HIST1H2BI	chr6	protein_coding	histone cluster 1, H2bi
ENSG00000255320.1	0	0.23	0	0	RP11-755F10.1	chr11	antisense
ENSG00000163877.9	5.9	6.59	6.59	6.12	SNIP1	chr1	protein_coding	Smad nuclear interacting protein 1
ENSG00000121578.12	13.79	18.91	20.14	18.74	B4GALT4	chr3	protein_coding	UDP-Gal:betaGlcNAc beta 1,4- galactosyltransferase, polypeptide 4
ENSG00000232396.2	0	0	0.06	0	RP1-76B20.11	chr22	antisense
ENSG00000139112.10	36.42	37.03	35.91	40.57	GABARAPL1	chr12	protein_coding	GABA(A) receptor-associated protein like 1
ENSG00000177551.5	0	0.01	0.08	0	NHLH2	chr1	protein_coding	nescient helix loop helix 2
ENSG00000063180.8	2.83	2.25	2.37	2.79	CA11	chr19	protein_coding	carbonic anhydrase XI
ENSG00000261135.1	0.78	0.12	1.54	1.35	RP4-798A10.7	chr1	lincRNA
ENSG00000100418.7	24.81	24.42	23.78	23.7	DESI1	chr22	protein_coding	desumoylating isopeptidase 1
ENSG00000179709.8	0.13	0	0	0	NLRP8	chr19	protein_coding	NLR family, pyrin domain containing 8
ENSG00000165507.8	0.56	0.28	0.31	1.45	C10orf10	chr10	protein_coding	chromosome 10 open reading frame 10
ENSG00000239672.7	169.61	209.41	148.95	127.46	NME1	chr17	protein_coding	NME/NM23 nucleoside diphosphate kinase 1
ENSG00000271430.1	0.3	0.29	1.29	0.64	RP3-368A4.5	chrX	sense_intronic
ENSG00000146374.13	0.98	1.29	1.8	1.71	RSPO3	chr6	protein_coding	R-spondin 3
ENSG00000143756.11	5.02	6.59	8.5	7.31	FBXO28	chr1	protein_coding	F-box protein 28
ENSG00000232949.1	0	0.08	0	0	AC002480.4	chr7	antisense
ENSG00000277075.1	22.94	20.53	23.24	13.47	HIST1H2AE	chr6	protein_coding	histone cluster 1, H2ae
ENSG00000273328.5	0	0.01	0.06	0	RP11-141M3.6	chr3	processed_transcript
ENSG00000103326.10	20.49	14.67	15.18	17.42	CAPN15	chr16	protein_coding	calpain 15
ENSG00000005059.15	3.04	4	2	3.33	CCDC109B	chr4	protein_coding	coiled-coil domain containing 109B
ENSG00000278862.1	0	0.04	0	0	RP11-571O6.2	chr16	TEC
ENSG00000114316.12	9	9.23	9.08	9.69	USP4	chr3	protein_coding	ubiquitin specific peptidase 4 (proto-oncogene)
ENSG00000267102.1	0.14	1.09	0.24	1.22	RP11-686D22.7	chr17	transcribed_processed_pseudogene
ENSG00000138678.10	2.95	2.68	2.27	3	AGPAT9	chr4	protein_coding	1-acylglycerol-3-phosphate O-acyltransferase 9
ENSG00000061676.14	2.03	3.46	5.22	4.51	NCKAP1	chr2	protein_coding	NCK-associated protein 1
ENSG00000124193.14	26.62	32.42	40.07	32.7	SRSF6	chr20	protein_coding	serine/arginine-rich splicing factor 6
ENSG00000160789.19	343.22	297.95	227.25	255.45	LMNA	chr1	protein_coding	lamin A/C
ENSG00000104774.12	12.08	9.09	10.91	11.42	MAN2B1	chr19	protein_coding	mannosidase, alpha, class 2B, member 1
ENSG00000197746.13	471.59	414.97	418.47	490.23	PSAP	chr10	protein_coding	prosaposin
ENSG00000236255.1	0.08	0.19	0.83	0.33	AC009404.2	chr2	lincRNA
ENSG00000070729.13	0.19	0.14	0.31	0.21	CNGB1	chr16	protein_coding	cyclic nucleotide gated channel beta 1
ENSG00000242516.1	1.18	1.23	1.69	1.55	LINC00960	chr3	lincRNA	long intergenic non-protein coding RNA 960
ENSG00000165698.15	2.78	2.08	2.17	1.77	C9orf9	chr9	protein_coding	chromosome 9 open reading frame 9
ENSG00000102387.15	0	0.05	0	0.17	TAF7L	chrX	protein_coding	TAF7-like RNA polymerase II, TATA box binding protein (TBP)-associated factor, 50kDa
ENSG00000251031.1	0	0	0	0.15	CTC-367F4.1	chr5	lincRNA
ENSG00000167110.16	70.97	57.71	50.01	63.99	GOLGA2	chr9	protein_coding	golgin A2
ENSG00000177679.15	0.51	0.83	0.34	0.43	SRRM3	chr7	protein_coding	serine/arginine repetitive matrix 3
ENSG00000275759.1	0	0.08	0.58	0.19	RP11-131L12.3	chr12	lincRNA
ENSG00000175595.14	1.22	1.74	2.53	1.83	ERCC4	chr16	protein_coding	excision repair cross-complementation group 4
ENSG00000118407.14	0.03	0	0	0.01	FILIP1	chr6	protein_coding	filamin A interacting protein 1
ENSG00000153165.18	0.06	0.01	0.06	0.03	RGPD3	chr2	protein_coding	RANBP2-like and GRIP domain containing 3
ENSG00000145041.15	8.39	7.41	8.57	9.29	VPRBP	chr3	protein_coding	Vpr (HIV-1) binding protein
ENSG00000238287.1	0	0	0.5	0	RP11-656D10.3	chr1	antisense
ENSG00000279504.1	0.12	0.23	0	0.23	AD001527.4	chr19	TEC
ENSG00000139675.11	0.86	0.59	1.74	0.95	HNRNPA1L2	chr13	protein_coding	heterogeneous nuclear ribonucleoprotein A1-like 2
ENSG00000237877.6	0.12	0.16	0	0	LINC01473	chr2	lincRNA	long intergenic non-protein coding RNA 1473
ENSG00000083635.7	2.63	2.42	3.27	3.45	NUFIP1	chr13	protein_coding	nuclear fragile X mental retardation protein interacting protein 1
ENSG00000272948.2	0.38	0.26	1.12	0	AP001412.1	chr21	antisense
ENSG00000256546.1	0.42	0.1	0.52	0.02	AC156455.1	chr12	processed_transcript
ENSG00000122733.12	0	0	0.01	0.03	PHF24	chr9	protein_coding
ENSG00000188766.12	0.56	0.34	0.39	0.5	SPRED3	chr19	protein_coding	sprouty-related, EVH1 domain containing 3
ENSG00000150201.14	0	0.88	0.18	0.13	FXYD4	chr10	protein_coding	FXYD domain containing ion transport regulator 4
ENSG00000255835.1	28.49	24.24	18.59	20.18	RP4-559A3.7	chr1	protein_coding
ENSG00000145495.14	18.58	18.24	29.37	29.7	2019-03-06	chr5	protein_coding	membrane-associated ring finger (C3HC4) 6, E3 ubiquitin protein ligase
ENSG00000076641.4	0.1	0.06	0.15	0.15	PAG1	chr8	protein_coding	phosphoprotein membrane anchor with glycosphingolipid microdomains 1
ENSG00000183625.14	0	0.04	0	0	CCR3	chr3	protein_coding	chemokine (C-C motif) receptor 3
ENSG00000260579.1	0	0.69	0.48	0.46	RP11-382A20.2	chr15	antisense
ENSG00000247516.4	0.92	1.51	1.89	1.29	MIR4458HG	chr5	lincRNA	MIR4458 host gene
ENSG00000175592.8	79.53	63.16	42.21	39.83	FOSL1	chr11	protein_coding	FOS-like antigen 1
ENSG00000275657.1	0	0	0.6	0	MIR6758	chr12	miRNA	microRNA 6758
ENSG00000156968.8	0.49	0.74	1.42	1.21	MPV17L	chr16	protein_coding	MPV17 mitochondrial membrane protein-like
ENSG00000157911.9	11.93	10.51	7.71	7.55	PEX10	chr1	protein_coding	peroxisomal biogenesis factor 10
ENSG00000168273.7	3.55	4.37	2.39	2.44	SMIM4	chr3	protein_coding	small integral membrane protein 4
ENSG00000167900.11	118.24	108.16	83.91	86.95	TK1	chr17	protein_coding	thymidine kinase 1, soluble
ENSG00000248905.8	0.06	0.06	0.06	0.05	FMN1	chr15	protein_coding	formin 1
ENSG00000115641.18	41.81	47.46	38.42	38.54	FHL2	chr2	protein_coding	four and a half LIM domains 2
ENSG00000174469.17	0.01	0	0	0.01	CNTNAP2	chr7	protein_coding	contactin associated protein-like 2
ENSG00000104880.17	3.85	3.4	2.41	3.4	ARHGEF18	chr19	protein_coding	Rho/Rac guanine nucleotide exchange factor (GEF) 18
ENSG00000246067.7	2.49	2.36	2.22	2.48	RAB30-AS1	chr11	lincRNA	RAB30 antisense RNA 1 (head to head)
ENSG00000124657.1	0.63	0.53	0.89	0.66	OR2B6	chr6	protein_coding	olfactory receptor, family 2, subfamily B, member 6
ENSG00000176248.8	21.36	19.71	15.17	17.15	ANAPC2	chr9	protein_coding	anaphase promoting complex subunit 2
ENSG00000225616.2	0	0	0.23	0	RP4-604A21.1	chr1	processed_pseudogene
ENSG00000103152.11	60.81	55.03	41.02	42.12	MPG	chr16	protein_coding	N-methylpurine-DNA glycosylase
ENSG00000126562.16	0.97	0.63	0.33	0.45	WNK4	chr17	protein_coding	WNK lysine deficient protein kinase 4
ENSG00000108771.12	0.23	0.07	0.09	0.01	DHX58	chr17	protein_coding	DEXH (Asp-Glu-X-His) box polypeptide 58
ENSG00000255449.1	0	0	0.43	0.26	RP11-91P24.6	chr11	antisense
ENSG00000104321.10	0	0.03	0	0.01	TRPA1	chr8	protein_coding	transient receptor potential cation channel, subfamily A, member 1
ENSG00000208892.1	1.33	0	0	1.88	SNORA49	chr12	snoRNA	small nucleolar RNA, H/ACA box 49
ENSG00000155961.4	0	0	0.07	0	RAB39B	chrX	protein_coding	RAB39B, member RAS oncogene family
ENSG00000253623.1	0	0.05	0	0	RP11-346I3.2	chr8	processed_pseudogene
ENSG00000258233.1	0	0	0.05	0	ARHGAP42P5	chr14	processed_pseudogene	Rho GTPase activating protein 42 pseudogene 5
ENSG00000123191.13	0.27	0.24	0.52	0.31	ATP7B	chr13	protein_coding	ATPase, Cu++ transporting, beta polypeptide
ENSG00000104969.9	40.5	39.64	33.35	34.27	SGTA	chr19	protein_coding	small glutamine-rich tetratricopeptide repeat (TPR)-containing, alpha
ENSG00000230621.1	0	0	0.18	0	AC080002.1	chr2	processed_pseudogene
ENSG00000099795.6	218.85	199.88	148.49	145.43	NDUFB7	chr19	protein_coding	NADH dehydrogenase (ubiquinone) 1 beta subcomplex, 7, 18kDa
ENSG00000272196.2	1.29	0.65	0.47	1.17	HIST2H2AA4	chr1	protein_coding	histone cluster 2, H2aa4
ENSG00000119650.12	6.27	7.38	4.54	3.88	IFT43	chr14	protein_coding	intraflagellar transport 43
ENSG00000189042.13	0.47	1.02	1.57	1.44	ZNF567	chr19	protein_coding	zinc finger protein 567
ENSG00000085741.12	0.56	0.33	0.1	0.02	WNT11	chr11	protein_coding	wingless-type MMTV integration site family, member 11
ENSG00000236673.5	1.03	0.35	0.42	0.43	RP11-69I8.2	chr6	lincRNA
ENSG00000262660.1	27.96	24.88	22.12	25.51	RP13-1032I1.10	chr17	protein_coding
ENSG00000204103.3	0.77	0.59	0.81	0.97	MAFB	chr20	protein_coding	v-maf avian musculoaponeurotic fibrosarcoma oncogene homolog B
ENSG00000184465.15	0.86	0.99	2.3	1.78	WDR27	chr6	protein_coding	WD repeat domain 27
ENSG00000151304.5	2.21	3.5	3.69	2.61	SRFBP1	chr5	protein_coding	serum response factor binding protein 1
ENSG00000080572.12	0	0.09	0	0	PIH1D3	chrX	protein_coding	PIH1 domain containing 3
ENSG00000166123.13	12.86	9.54	10.19	11.32	GPT2	chr16	protein_coding	glutamic pyruvate transaminase (alanine aminotransferase) 2
ENSG00000205981.6	12.98	15.09	11.23	10.89	DNAJC19	chr3	protein_coding	DnaJ (Hsp40) homolog, subfamily C, member 19
ENSG00000234616.8	6.45	4.6	5.61	6.75	JRK	chr8	protein_coding	Jrk homolog (mouse)
ENSG00000161904.11	33.34	31.36	26.05	27.7	LEMD2	chr6	protein_coding	LEM domain containing 2
ENSG00000119446.13	4.93	8.51	8.89	7.38	RBM18	chr9	protein_coding	RNA binding motif protein 18
ENSG00000196743.8	10.57	8.3	8.72	9.29	GM2A	chr5	protein_coding	GM2 ganglioside activator
ENSG00000125741.4	4.62	4.69	4.2	4.89	OPA3	chr19	protein_coding	optic atrophy 3 (autosomal recessive, with chorea and spastic paraplegia)
ENSG00000072832.14	15.12	11.79	10.04	11.94	CRMP1	chr4	protein_coding	collapsin response mediator protein 1
ENSG00000184545.10	1.12	0.82	0.96	0.66	DUSP8	chr11	protein_coding	dual specificity phosphatase 8
ENSG00000272696.1	0.47	1.59	3.12	2.23	RP11-339B21.13	chr9	antisense
ENSG00000137100.15	19.4	22.84	16.88	18.34	DCTN3	chr9	protein_coding	dynactin 3 (p22)
ENSG00000272986.1	0	0.24	0.36	0.64	RP11-46J23.1	chr4	antisense
ENSG00000239305.6	2.36	2.77	4.27	3.43	RNF103	chr2	protein_coding	ring finger protein 103
ENSG00000234851.4	2.02	3.68	2.99	3.18	RPL23AP42	chr3	processed_pseudogene	ribosomal protein L23a pseudogene 42
ENSG00000006530.15	5.35	6.04	6.52	6.54	AGK	chr7	protein_coding	acylglycerol kinase
ENSG00000106346.11	3.14	3.14	3.74	4.89	USP42	chr7	protein_coding	ubiquitin specific peptidase 42
ENSG00000119559.15	5.58	6	4.52	5.09	C19orf25	chr19	protein_coding	chromosome 19 open reading frame 25
ENSG00000240087.3	0.2	0.36	0.13	0.16	RP11-254B13.1	chr12	processed_pseudogene
ENSG00000270231.3	6.58	6.05	10.83	8.64	NBPF8	chr1	unprocessed_pseudogene	neuroblastoma breakpoint family, member 8
ENSG00000204070.9	10.1	9.74	8.11	9.21	SYS1	chr20	protein_coding	Sys1 golgi trafficking protein
ENSG00000110911.14	6.73	5.64	8.86	10.28	SLC11A2	chr12	protein_coding	solute carrier family 11 (proton-coupled divalent metal ion transporter), member 2
ENSG00000100911.13	36.2	45.28	36.11	32.24	PSME2	chr14	protein_coding	proteasome (prosome, macropain) activator subunit 2 (PA28 beta)
ENSG00000105643.9	12.83	13.17	12.68	12.65	ARRDC2	chr19	protein_coding	arrestin domain containing 2
ENSG00000266397.1	0	0	0.07	0.06	RP11-737O24.1	chr18	antisense
ENSG00000259065.1	1.5	0.88	1.06	0.38	RP5-1021I20.1	chr14	antisense
ENSG00000183691.4	5.75	4.19	3.22	3.8	NOG	chr17	protein_coding	noggin
ENSG00000146476.10	4.87	6.63	8.33	7.92	ARMT1	chr6	protein_coding	acidic residue methyltransferase 1
ENSG00000165914.14	0.19	0.29	0.21	0.24	TTC7B	chr14	protein_coding	tetratricopeptide repeat domain 7B
ENSG00000120963.11	5.86	5.05	4.56	4.98	ZNF706	chr8	protein_coding	zinc finger protein 706
ENSG00000214770.2	0.07	0.14	0.09	0	RP11-544I20.2	chr14	antisense
ENSG00000100889.11	8.97	8.23	6.38	6.44	PCK2	chr14	protein_coding	phosphoenolpyruvate carboxykinase 2 (mitochondrial)
ENSG00000111276.10	16.57	15.37	18.32	17.88	CDKN1B	chr12	protein_coding	cyclin-dependent kinase inhibitor 1B (p27, Kip1)
ENSG00000106538.9	1.42	1.7	1.17	1.38	RARRES2	chr7	protein_coding	retinoic acid receptor responder (tazarotene induced) 2
ENSG00000142186.16	47.54	46.23	38.25	41.7	SCYL1	chr11	protein_coding	SCY1-like 1 (S. cerevisiae)
ENSG00000278869.1	3.25	0.57	1.39	0.87	CITF22-49E9.3	chr22	lincRNA
ENSG00000169758.12	0.2	0	0.17	0.17	C15orf27	chr15	protein_coding	chromosome 15 open reading frame 27
ENSG00000256779.1	0	0.05	0.04	0.11	RP11-60C6.5	chr11	processed_pseudogene
ENSG00000066322.12	60.25	69.05	49.49	48.86	ELOVL1	chr1	protein_coding	ELOVL fatty acid elongase 1
ENSG00000241749.4	0.07	0.34	0.45	0.11	RPSAP52	chr12	transcribed_processed_pseudogene	ribosomal protein SA pseudogene 52
ENSG00000235990.2	0.22	0	0	0	RPL23AP20	chr1	processed_pseudogene	ribosomal protein L23a pseudogene 20
ENSG00000137491.14	0	0.01	0	0.02	SLCO2B1	chr11	protein_coding	solute carrier organic anion transporter family, member 2B1
ENSG00000271533.1	0.05	0.07	0.49	0.2	RP3-368A4.6	chrX	sense_intronic
ENSG00000137124.6	12.86	12.61	14.2	14.54	ALDH1B1	chr9	protein_coding	aldehyde dehydrogenase 1 family, member B1
ENSG00000259380.5	0.24	0.33	0.91	0.25	RP11-346D14.1	chr15	lincRNA
ENSG00000116747.12	1.98	2.25	3.44	2.46	TROVE2	chr1	protein_coding	TROVE domain family, member 2
ENSG00000158793.13	7.53	8.15	6.14	5.99	NIT1	chr1	protein_coding	nitrilase 1
ENSG00000056586.15	2.87	3.96	6.22	4.69	RC3H2	chr9	protein_coding	ring finger and CCCH-type domains 2
ENSG00000218996.1	0	0.23	0.44	0	RP1-99E18.2	chr6	processed_pseudogene
ENSG00000173598.13	6.74	8.76	10.52	10.29	NUDT4	chr12	protein_coding	nudix (nucleoside diphosphate linked moiety X)-type motif 4
ENSG00000261594.3	0.76	0.49	0.4	0.35	TPBGL	chr11	protein_coding	trophoblast glycoprotein-like
ENSG00000122026.10	490.15	583.6	490.47	420.59	RPL21	chr13	protein_coding	ribosomal protein L21
ENSG00000255641.1	0	0	0	0.11	RP11-277P12.6	chr12	protein_coding
ENSG00000166446.14	3.92	3.59	5.24	5.75	CDYL2	chr16	protein_coding	chromodomain protein, Y-like 2
ENSG00000222033.1	0.45	0.45	0.04	0.38	LINC01124	chr2	lincRNA	long intergenic non-protein coding RNA 1124
ENSG00000126391.13	21.37	21.46	16.32	16.78	FRMD8	chr11	protein_coding	FERM domain containing 8
ENSG00000266385.1	0	0	0.21	0	RP11-227G15.8	chr17	lincRNA
ENSG00000231050.1	0	0.2	0.21	0.16	RP1-140A9.1	chr1	antisense
ENSG00000236679.2	0	0.12	0	0	RPL23AP24	chr1	processed_pseudogene	ribosomal protein L23a pseudogene 24
ENSG00000151693.9	5.65	8.43	14.37	13.58	ASAP2	chr2	protein_coding	ArfGAP with SH3 domain, ankyrin repeat and PH domain 2
ENSG00000136999.4	3.77	3.67	3.82	4.72	NOV	chr8	protein_coding	nephroblastoma overexpressed
ENSG00000272173.1	0.87	0.37	0.24	0.37	U47924.31	chr12	antisense
ENSG00000076242.14	15.81	15.51	15.6	14.12	MLH1	chr3	protein_coding	mutL homolog 1
ENSG00000139546.10	25.81	30.08	23.16	21.77	TARBP2	chr12	protein_coding	TAR (HIV-1) RNA binding protein 2
ENSG00000254510.1	0	0.05	0.12	0.15	RP11-867G23.10	chr11	processed_transcript
ENSG00000249898.7	0	0	0.01	0	MCPH1-AS1	chr8	antisense	MCPH1 antisense RNA 1
ENSG00000163993.6	16.33	19.57	12.38	16.24	S100P	chr4	protein_coding	S100 calcium binding protein P
ENSG00000115318.11	0.84	0.6	0.34	0.41	LOXL3	chr2	protein_coding	lysyl oxidase-like 3
ENSG00000235790.7	0.33	0.15	0	0	RP11-73M7.6	chr1	antisense
ENSG00000138381.9	5.87	7.5	8.7	5.89	ASNSD1	chr2	protein_coding	asparagine synthetase domain containing 1
ENSG00000274210.1	0	1.93	3.69	3.76	U1	chr1	snRNA
ENSG00000103994.16	5.69	7.74	12.82	13.13	ZNF106	chr15	protein_coding	zinc finger protein 106
ENSG00000137710.14	10.12	15.87	22.86	20.25	RDX	chr11	protein_coding	radixin
ENSG00000182858.13	2.12	2.23	1.82	2.14	ALG12	chr22	protein_coding	ALG12, alpha-1,6-mannosyltransferase
ENSG00000265706.1	0	0	0	0.47	SNORD53_SNORD92	chr2	snoRNA
ENSG00000005102.12	0.15	0.37	0.15	0.73	MEOX1	chr17	protein_coding	mesenchyme homeobox 1
ENSG00000141428.16	3.21	4.76	4.61	4.88	C18orf21	chr18	protein_coding	chromosome 18 open reading frame 21
ENSG00000104903.4	0.03	0	0	0	LYL1	chr19	protein_coding	lymphoblastic leukemia associated hematopoiesis regulator 1
ENSG00000163291.14	0.92	1.09	1.17	1.1	PAQR3	chr4	protein_coding	progestin and adipoQ receptor family member III
ENSG00000086548.8	0	0	0.06	0	CEACAM6	chr19	protein_coding	carcinoembryonic antigen-related cell adhesion molecule 6 (non-specific cross reacting antigen)
ENSG00000134202.10	85.67	101.14	81.79	77.62	GSTM3	chr1	protein_coding	glutathione S-transferase mu 3 (brain)
ENSG00000258643.5	41.94	43.35	36.78	42.19	BCL2L2-PABPN1	chr14	protein_coding	BCL2L2-PABPN1 readthrough
ENSG00000234724.1	0	0.03	0	0	HDAC1P1	chr10	processed_pseudogene	histone deacetylase 1 pseudogene 1
ENSG00000236209.1	0.59	0.48	1.3	0.53	AC104135.2	chr2	lincRNA
ENSG00000239462.1	0	0	0.29	0	CTD-2021J15.1	chr3	antisense
ENSG00000073282.12	0.1	0.1	0	0.04	TP63	chr3	protein_coding	tumor protein p63
ENSG00000227938.1	0	0	0.04	0	AC104695.4	chr2	lincRNA
ENSG00000136010.13	0.25	0.61	0.99	1.06	ALDH1L2	chr12	protein_coding	aldehyde dehydrogenase 1 family, member L2
ENSG00000255438.2	0.02	0	0	0	CTD-2653D5.1	chr20	antisense
ENSG00000151247.12	3.12	3.86	4.08	3.91	EIF4E	chr4	protein_coding	eukaryotic translation initiation factor 4E
ENSG00000015676.17	12.99	14.21	12.23	12.67	NUDCD3	chr7	protein_coding	NudC domain containing 3
ENSG00000141510.15	25.6	24.35	21.19	25.89	TP53	chr17	protein_coding	tumor protein p53
ENSG00000114541.14	0.34	0.08	0.3	0.16	FRMD4B	chr3	protein_coding	FERM domain containing 4B
ENSG00000269439.5	1.05	0.77	0.83	1.06	CTD-3131K8.2	chr19	lincRNA
ENSG00000259772.6	0	0	0	0.21	RP11-16E12.2	chr15	lincRNA
ENSG00000164332.7	5.63	7.07	8.3	8.67	UBLCP1	chr5	protein_coding	ubiquitin-like domain containing CTD phosphatase 1
ENSG00000259952.1	0.17	0	0.42	0	AC009133.15	chr16	antisense
ENSG00000249476.1	0.07	0	0.02	0.05	CTD-2587M2.1	chr5	lincRNA
ENSG00000104131.12	41.46	63.11	67.07	63.64	EIF3J	chr15	protein_coding	eukaryotic translation initiation factor 3, subunit J
ENSG00000232621.1	0	0	0	0.08	C4BPAP2	chr1	unprocessed_pseudogene	complement component 4 binding protein, alpha pseudogene 2
ENSG00000155393.12	4.53	8.21	7.78	7.04	HEATR3	chr16	protein_coding	HEAT repeat containing 3
ENSG00000257576.1	0	0.11	0.29	0.24	RP11-153M3.1	chr12	processed_pseudogene
ENSG00000052749.13	29.44	23.04	18.03	21.78	RRP12	chr10	protein_coding	ribosomal RNA processing 12 homolog (S. cerevisiae)
ENSG00000112297.14	0.46	0.4	0.71	0.61	AIM1	chr6	protein_coding	absent in melanoma 1
ENSG00000231428.2	0.31	0	0	0	LINC00396	chr13	lincRNA	long intergenic non-protein coding RNA 396
ENSG00000165392.9	2.11	2.54	3.5	3.03	WRN	chr8	protein_coding	Werner syndrome, RecQ helicase-like
ENSG00000182993.3	0.91	1.98	0.7	1.58	C12orf60	chr12	protein_coding	chromosome 12 open reading frame 60
ENSG00000152404.15	3.29	4.87	4.47	3.33	CWF19L2	chr11	protein_coding	CWF19-like 2, cell cycle control (S. pombe)
ENSG00000269095.1	0	0.27	0	0	AC010646.3	chr19	protein_coding
ENSG00000227500.9	14.71	11.84	10.03	13.1	SCAMP4	chr19	protein_coding	secretory carrier membrane protein 4
ENSG00000141198.13	3.64	4.71	5.73	5.77	TOM1L1	chr17	protein_coding	target of myb1 (chicken)-like 1
ENSG00000237222.3	0	0.05	0	0	AC090505.6	chr3	lincRNA
ENSG00000230629.2	0.55	0.41	0.58	0.89	RPS23P8	chrX	processed_pseudogene	ribosomal protein S23 pseudogene 8
ENSG00000258711.2	0.22	0.47	0.57	0.48	RP11-218E20.3	chr14	lincRNA
ENSG00000164440.14	0	0	0.01	0.01	TXLNB	chr6	protein_coding	taxilin beta
ENSG00000177993.3	0.27	0	0.05	0.29	ZNRF3-AS1	chr22	antisense	ZNRF3 antisense RNA 1
ENSG00000006071.11	0	0.01	0	0	ABCC8	chr11	protein_coding	ATP-binding cassette, sub-family C (CFTR/MRP), member 8
ENSG00000253872.1	0.02	0	0	0	RP11-90D11.1	chr8	lincRNA
ENSG00000232818.2	3	5.88	2.3	4.05	RPS2P32	chr7	processed_pseudogene	ribosomal protein S2 pseudogene 32
ENSG00000203644.3	0.9	4.76	3.64	4.09	RP11-332M2.1	chr3	sense_intronic
ENSG00000272983.1	0.04	0.02	0	0	RP11-508N22.12	chr10	lincRNA
ENSG00000249851.1	0	0.4	0	0	RP11-166J22.1	chr5	processed_pseudogene
ENSG00000072682.18	43.42	37.58	39.45	39.39	P4HA2	chr5	protein_coding	prolyl 4-hydroxylase, alpha polypeptide II
ENSG00000263818.5	0	0	0.09	0	CTD-2206N4.4	chr17	transcribed_processed_pseudogene
ENSG00000173517.10	0.89	0.98	2.18	2.4	PEAK1	chr15	protein_coding	pseudopodium-enriched atypical kinase 1
ENSG00000122042.9	1.69	2.34	3.52	3.21	UBL3	chr13	protein_coding	ubiquitin-like 3
ENSG00000256103.2	0	0	0.15	0	RP1-96H9.5	chr12	processed_pseudogene
ENSG00000210112.1	4	3.35	5.6	3.22	MT-TM	chrM	Mt_tRNA	mitochondrially encoded tRNA methionine
ENSG00000141458.12	24.2	19.4	21.64	26.42	NPC1	chr18	protein_coding	Niemann-Pick disease, type C1
ENSG00000261578.1	0.71	0.4	0.82	0.92	RP11-21L23.2	chr11	sense_overlapping
ENSG00000149054.14	0	0.05	0	0.03	ZNF215	chr11	protein_coding	zinc finger protein 215
ENSG00000227543.4	0	0.06	0.19	0.24	SPAG5-AS1	chr17	processed_transcript	SPAG5 antisense RNA 1
ENSG00000175104.14	1.56	2.34	2.48	2.59	TRAF6	chr11	protein_coding	TNF receptor-associated factor 6, E3 ubiquitin protein ligase
ENSG00000166960.16	0	0	0.01	0	CCDC178	chr18	protein_coding	coiled-coil domain containing 178
ENSG00000225462.1	0	0.04	0	0	FDPSP1	chr1	processed_pseudogene	farnesyl diphosphate synthase pseudogene 1
ENSG00000227375.5	0	0	0.16	0.09	DLG1-AS1	chr3	antisense	DLG1 antisense RNA 1
ENSG00000255176.1	0	0	0.16	0.55	AP002954.3	chr11	antisense
ENSG00000128590.4	3.37	2.47	4.84	4.2	DNAJB9	chr7	protein_coding	DnaJ (Hsp40) homolog, subfamily B, member 9
ENSG00000228106.5	7.14	7.78	5.45	6.13	RP11-452F19.3	chr1	lincRNA
ENSG00000165264.10	14.2	16.46	12.53	9.76	NDUFB6	chr9	protein_coding	NADH dehydrogenase (ubiquinone) 1 beta subcomplex, 6, 17kDa
ENSG00000242282.6	0.82	1.65	1.32	0.83	AC108488.4	chr2	lincRNA
ENSG00000276790.1	0	0.17	0	0	RP11-290H9.5	chr17	antisense
ENSG00000140350.15	90.26	99.18	91.58	96.5	ANP32A	chr15	protein_coding	acidic (leucine-rich) nuclear phosphoprotein 32 family, member A
ENSG00000235865.2	0	0	0.01	0	GSN-AS1	chr9	antisense	GSN antisense RNA 1
ENSG00000227400.2	0	0	0	0.04	AC012501.2	chr2	sense_overlapping
ENSG00000130962.17	1.46	2.22	3.4	3.4	PRRG1	chrX	protein_coding	proline rich Gla (G-carboxyglutamic acid) 1
ENSG00000237172.3	6.96	5.16	4.21	5.85	B3GNT9	chr16	protein_coding	UDP-GlcNAc:betaGal beta-1,3-N-acetylglucosaminyltransferase 9
ENSG00000272172.1	0.61	2.25	0.34	0.65	RP13-582O9.7	chr8	antisense
ENSG00000117868.15	21.16	20.91	28.58	29.95	ESYT2	chr7	protein_coding	extended synaptotagmin-like protein 2
ENSG00000111331.12	24.97	18.71	17.71	22.66	OAS3	chr12	protein_coding	2'-5'-oligoadenylate synthetase 3, 100kDa
ENSG00000174939.10	18.99	15.49	13.6	14.36	ASPHD1	chr16	protein_coding	aspartate beta-hydroxylase domain containing 1
ENSG00000247572.7	0.87	0.74	1.24	1.24	CKMT2-AS1	chr5	antisense	CKMT2 antisense RNA 1
ENSG00000062194.15	4.69	8.57	13	10.2	GPBP1	chr5	protein_coding	GC-rich promoter binding protein 1
ENSG00000109265.12	2.08	1.42	2.07	2.12	KIAA1211	chr4	protein_coding	KIAA1211
ENSG00000117122.13	9.85	13.42	8.64	14.49	MFAP2	chr1	protein_coding	microfibrillar-associated protein 2
ENSG00000100632.10	70.68	88.54	74.83	76.26	ERH	chr14	protein_coding	enhancer of rudimentary homolog (Drosophila)
ENSG00000122035.6	0.82	0.35	1.04	0.62	RASL11A	chr13	protein_coding	RAS-like, family 11, member A
ENSG00000247699.2	0	0	0	0.01	CTB-127C13.1	chr5	antisense
ENSG00000213533.11	1.76	1.38	0.91	1.42	TMEM110	chr3	protein_coding	transmembrane protein 110
ENSG00000007923.15	38.81	29.15	34.86	31.15	DNAJC11	chr1	protein_coding	DnaJ (Hsp40) homolog, subfamily C, member 11
ENSG00000200942.1	0	0	1.14	0.37	RNU6-501P	chr1	snRNA	RNA, U6 small nuclear 501, pseudogene
ENSG00000139174.10	0.18	0.24	0.1	0.14	PRICKLE1	chr12	protein_coding	prickle homolog 1 (Drosophila)
ENSG00000261824.6	1.15	1.05	1.63	1.2	LINC00662	chr19	lincRNA	long intergenic non-protein coding RNA 662
ENSG00000198535.5	0	0	0.02	0	C2CD4A	chr15	protein_coding	C2 calcium-dependent domain containing 4A
ENSG00000198171.12	13.97	16.41	12.27	13.01	DDRGK1	chr20	protein_coding	DDRGK domain containing 1
ENSG00000223705.9	2.38	3	3.48	1.83	NSUN5P1	chr7	transcribed_unprocessed_pseudogene	NOP2/Sun domain family, member 5 pseudogene 1
ENSG00000215784.5	0.66	1.08	1.24	1.45	FAM72D	chr1	protein_coding	family with sequence similarity 72, member D
ENSG00000264451.1	0	0	0	0.05	RP11-433M22.2	chr17	lincRNA
ENSG00000010818.8	1.49	1.71	2.29	1.88	HIVEP2	chr6	protein_coding	human immunodeficiency virus type I enhancer binding protein 2
ENSG00000246596.6	0	0	0	0.09	RP11-1277A3.2	chr5	transcribed_unprocessed_pseudogene
ENSG00000100221.10	17.57	16.27	17.67	16.6	JOSD1	chr22	protein_coding	Josephin domain containing 1
ENSG00000245534.6	0.7	0.91	0.44	0.3	RORA-AS1	chr15	antisense	RORA antisense RNA 1
ENSG00000139278.9	0.05	0.08	0.14	0.07	GLIPR1	chr12	protein_coding	GLI pathogenesis-related 1
ENSG00000171490.12	33.1	40.37	47.39	41.88	RSL1D1	chr16	protein_coding	ribosomal L1 domain containing 1
ENSG00000253516.1	0.31	2.28	0	0	HMGB1P41	chr8	processed_pseudogene	high mobility group box 1 pseudogene 41
ENSG00000106610.14	4.02	4.23	4.56	4.67	STAG3L4	chr7	transcribed_unprocessed_pseudogene	stromal antigen 3-like 4 (pseudogene)
ENSG00000168303.6	2.64	2.75	2.47	2.64	MPLKIP	chr7	protein_coding	M-phase specific PLK1 interacting protein
ENSG00000227627.1	0	0	0.63	0.44	RP1-101K10.6	chr6	antisense
ENSG00000146233.7	0	0	0.02	0.1	CYP39A1	chr6	protein_coding	cytochrome P450, family 39, subfamily A, polypeptide 1
ENSG00000079150.17	0.8	0.8	1.97	1.33	FKBP7	chr2	protein_coding	FK506 binding protein 7
ENSG00000140464.19	3.27	2.75	2.52	2.83	PML	chr15	protein_coding	promyelocytic leukemia
ENSG00000259916.1	0	0	0.04	0	RP11-407P15.2	chr2	protein_coding
ENSG00000107643.15	2.87	4.17	4.64	4.62	MAPK8	chr10	protein_coding	mitogen-activated protein kinase 8
ENSG00000118473.21	0	0.06	0	0	SGIP1	chr1	protein_coding	SH3-domain GRB2-like (endophilin) interacting protein 1
ENSG00000239510.2	0	0	0	0.16	RPL9P5	chr14	processed_pseudogene	ribosomal protein L9 pseudogene 5
ENSG00000129625.12	17.26	20.4	15.15	16.41	REEP5	chr5	protein_coding	receptor accessory protein 5
ENSG00000184232.8	19.04	21.72	17.53	17.81	OAF	chr11	protein_coding	OAF homolog (Drosophila)
ENSG00000278187.1	0	0	0.69	0	AC114801.1	chr4	miRNA
ENSG00000157005.3	0	0.3	0	0	SST	chr3	protein_coding	somatostatin
ENSG00000185670.7	2.77	1.52	2.02	1.74	ZBTB3	chr11	protein_coding	zinc finger and BTB domain containing 3
ENSG00000120742.10	22.37	28.3	27.29	25.46	SERP1	chr3	protein_coding	stress-associated endoplasmic reticulum protein 1
ENSG00000173011.11	3.44	3.09	2.98	2.82	TADA2B	chr4	protein_coding	transcriptional adaptor 2B
ENSG00000156642.16	23.93	25.86	31.32	31.97	NPTN	chr15	protein_coding	neuroplastin
ENSG00000254142.2	0	0	0.19	0	RP11-53M11.3	chr8	lincRNA
ENSG00000170619.9	7.91	10.97	8.76	6.26	COMMD5	chr8	protein_coding	COMM domain containing 5
ENSG00000145022.4	12.52	10.6	8.01	8.86	TCTA	chr3	protein_coding	T-cell leukemia translocation altered
ENSG00000038358.14	21.57	16.79	14.43	19.88	EDC4	chr16	protein_coding	enhancer of mRNA decapping 4
ENSG00000197568.13	8.68	11.32	8.02	6.77	HHLA3	chr1	protein_coding	HERV-H LTR-associating 3
ENSG00000230899.1	0	0	0	0.08	MAGEA8-AS1	chrX	antisense	MAGEA8 antisense RNA 1 (head to head)
ENSG00000223756.6	0.07	0	0	0	TSSC2	chr11	transcribed_unprocessed_pseudogene	tumor suppressing subtransferable candidate 2 pseudogene
ENSG00000273199.1	0.36	0.21	0.22	0.46	AP000692.10	chr21	antisense
ENSG00000009780.15	0.85	1.19	1.95	1.82	FAM76A	chr1	protein_coding	family with sequence similarity 76, member A
ENSG00000188517.14	0.04	0.08	0.01	0.08	COL25A1	chr4	protein_coding	collagen, type XXV, alpha 1
ENSG00000186399.10	0.22	0.19	0	0.27	GOLGA8R	chr15	protein_coding	golgin A8 family, member R
ENSG00000259445.1	0	0	0.14	0.42	RP11-276M12.1	chr15	lincRNA
ENSG00000261838.5	0	0.45	0	0	RP11-303E16.6	chr16	antisense
ENSG00000237738.1	0	0	0.68	0.22	RNF216-IT1	chr7	sense_intronic	RNF216 intronic transcript 1
ENSG00000104886.9	7.96	8	7.05	7.68	PLEKHJ1	chr19	protein_coding	pleckstrin homology domain containing, family J member 1
ENSG00000274068.1	0.41	0.41	0.61	0.92	RP11-475E11.9	chr1	protein_coding
ENSG00000186471.12	0	0	0	0.07	AKAP14	chrX	protein_coding	A kinase (PRKA) anchor protein 14
ENSG00000106443.14	3.7	7.08	8.33	7.63	PHF14	chr7	protein_coding	PHD finger protein 14
ENSG00000164746.13	0.06	0.15	0	0.05	C7orf57	chr7	protein_coding	chromosome 7 open reading frame 57
ENSG00000138031.14	10.76	6.93	6.32	8.51	ADCY3	chr2	protein_coding	adenylate cyclase 3
ENSG00000125877.12	33.07	35.4	29.64	25.2	ITPA	chr20	protein_coding	inosine triphosphatase (nucleoside triphosphate pyrophosphatase)
ENSG00000277873.1	0.52	0	0.87	0.26	RP11-33N14.3	chr12	antisense
ENSG00000248964.6	0	0.24	0.35	0.08	RP11-94H18.1	chr8	lincRNA
ENSG00000225087.1	0.18	0	0.46	0.15	RP4-660H19.1	chr1	lincRNA
ENSG00000134308.13	186.17	218.4	218.98	212.9	YWHAQ	chr2	protein_coding	tyrosine 3-monooxygenase/tryptophan 5-monooxygenase activation protein, theta
ENSG00000132388.12	15.01	18.96	19.42	22.36	UBE2G1	chr17	protein_coding	ubiquitin-conjugating enzyme E2G 1
ENSG00000070759.16	2.48	2.19	1.71	2.2	TESK2	chr1	protein_coding	testis-specific kinase 2
ENSG00000251451.1	0	0	0.38	0.12	GTF2IP9	chr7	unprocessed_pseudogene
ENSG00000240771.6	0.51	0.57	0.21	0.52	ARHGEF25	chr12	protein_coding	Rho guanine nucleotide exchange factor (GEF) 25
ENSG00000272842.1	0	0.16	0.34	0	RP11-513M16.7	chr9	antisense
ENSG00000247708.7	0.27	0.15	0.15	0.24	STX18-AS1	chr4	antisense	STX18 antisense RNA 1 (head to head)
ENSG00000092841.18	539.32	602.48	435.83	416.46	MYL6	chr12	protein_coding	myosin, light chain 6, alkali, smooth muscle and non-muscle
ENSG00000163956.10	9.04	8.78	7.18	7.52	LRPAP1	chr4	protein_coding	low density lipoprotein receptor-related protein associated protein 1
ENSG00000187866.7	1.26	1.79	2.11	1.96	FAM122A	chr9	protein_coding	family with sequence similarity 122A
ENSG00000180229.12	0.83	0.56	1.17	0.91	HERC2P3	chr15	transcribed_unprocessed_pseudogene	hect domain and RLD 2 pseudogene 3
ENSG00000244310.1	0	0	0	0.2	RP11-734K21.3	chr2	lincRNA
ENSG00000178252.17	40.14	28.65	28.18	33.06	WDR6	chr3	protein_coding	WD repeat domain 6
ENSG00000259799.1	0.4	0.08	0.13	0	RP11-554A11.9	chr11	antisense
ENSG00000171444.17	1.31	1.51	1.55	1.83	MCC	chr5	protein_coding	mutated in colorectal cancers
ENSG00000258938.1	0.32	0.65	0.58	0.39	RP11-317N8.5	chr14	antisense
ENSG00000151503.12	23.83	18.76	27.73	33.25	NCAPD3	chr11	protein_coding	non-SMC condensin II complex, subunit D3
ENSG00000225760.1	2.85	1.93	3.28	1.23	LINC00431	chr13	lincRNA	long intergenic non-protein coding RNA 431
ENSG00000105700.10	19.19	15.37	14.97	14.33	KXD1	chr19	protein_coding	KxDL motif containing 1
ENSG00000272750.1	0.22	0.02	0.12	0.22	RP11-378J18.8	chr1	antisense
ENSG00000160410.14	48.74	44.92	34.06	37.3	SHKBP1	chr19	protein_coding	SH3KBP1 binding protein 1
ENSG00000261455.1	0.67	1.09	1.23	0.7	LINC01003	chr7	lincRNA	long intergenic non-protein coding RNA 1003
ENSG00000224316.1	0.25	0.19	0.47	0.1	GTF2IP5	chr7	unprocessed_pseudogene
ENSG00000231298.6	0.26	0.38	0.12	0.42	LINC00704	chr10	lincRNA	long intergenic non-protein coding RNA 704
ENSG00000168476.11	29.49	26.47	21.32	26.03	REEP4	chr8	protein_coding	receptor accessory protein 4
ENSG00000225697.10	23.85	18.07	17.27	18.65	SLC26A6	chr3	protein_coding	solute carrier family 26 (anion exchanger), member 6
ENSG00000152944.8	9.68	14.22	19.04	17.26	MED21	chr12	protein_coding	mediator complex subunit 21
ENSG00000136986.9	16.17	16.43	18.31	15.95	DERL1	chr8	protein_coding	derlin 1
ENSG00000162627.16	9.65	15.34	14.26	14.06	SNX7	chr1	protein_coding	sorting nexin 7
ENSG00000173465.7	46.57	42.81	29.77	28.02	SSSCA1	chr11	protein_coding	Sjogren syndrome/scleroderma autoantigen 1
ENSG00000135063.17	0.34	0.28	0.29	0.18	FAM189A2	chr9	protein_coding	family with sequence similarity 189, member A2
ENSG00000226468.2	0	0	0.38	0	AC018641.7	chr7	processed_pseudogene
ENSG00000269118.1	0	0	0.06	0	FAM90A28P	chr19	transcribed_unprocessed_pseudogene	family with sequence similarity 90, member A28, pseudogene
ENSG00000175449.13	0.29	0.5	0.29	0.19	RFESD	chr5	protein_coding	Rieske (Fe-S) domain containing
ENSG00000183458.13	2.19	1.31	1.9	2.21	RP11-958N24.1	chr16	transcribed_unprocessed_pseudogene
ENSG00000184497.12	3.55	2.42	1.41	2.08	TMEM255B	chr13	protein_coding	transmembrane protein 255B
ENSG00000137275.13	4.72	4.37	5.89	5.41	RIPK1	chr6	protein_coding	receptor (TNFRSF)-interacting serine-threonine kinase 1
ENSG00000279044.1	0	0.38	0	0.3	AC007787.3	chr19	TEC
ENSG00000100385.13	0.47	0.44	0.38	0.51	IL2RB	chr22	protein_coding	interleukin 2 receptor, beta
ENSG00000055955.15	0	0	0.06	0.07	ITIH4	chr3	protein_coding	inter-alpha-trypsin inhibitor heavy chain family, member 4
ENSG00000212283.1	5.17	0.4	2	1.28	SNORD89	chr2	snoRNA	small nucleolar RNA, C/D box 89
ENSG00000035687.9	14	16.32	25.31	24.28	ADSS	chr1	protein_coding	adenylosuccinate synthase
ENSG00000263345.1	0.04	0.18	0.34	0.03	RP1-59D14.5	chr17	antisense
ENSG00000169627.7	0	0	0	0.04	BOLA2B	chr16	protein_coding	bolA family member 2B
ENSG00000132832.9	4.8	4.77	4.65	3.56	LINC01260	chr20	antisense	long intergenic non-protein coding RNA 1260
ENSG00000260198.1	0	0	0.02	0.14	RP11-441F2.2	chr16	sense_intronic
ENSG00000229809.8	3.89	2.74	2.54	2.11	ZNF688	chr16	protein_coding	zinc finger protein 688
ENSG00000133114.17	0.81	0.82	1.43	1.01	GPALPP1	chr13	protein_coding	GPALPP motifs containing 1
ENSG00000268051.1	0	0	0	0.06	CTC-244M17.1	chr19	sense_intronic
ENSG00000270015.1	1.05	1.35	1.57	1.52	RP11-540B6.6	chr15	sense_intronic
ENSG00000272599.2	3.05	1.2	3.06	2.1	RP11-152N13.16	chr10	antisense
ENSG00000243279.3	12.74	13.37	10.61	14.72	PRAF2	chrX	protein_coding	PRA1 domain family, member 2
ENSG00000138166.5	41.37	31.4	24.51	22.5	DUSP5	chr10	protein_coding	dual specificity phosphatase 5
ENSG00000136274.8	0.05	0.16	0.22	0.12	NACAD	chr7	protein_coding	NAC alpha domain containing
ENSG00000184185.9	18.13	16.61	10.09	11.06	KCNJ12	chr17	protein_coding	potassium channel, inwardly rectifying subfamily J, member 12
ENSG00000148660.20	18.12	17.16	18.43	17.99	CAMK2G	chr10	protein_coding	calcium/calmodulin-dependent protein kinase II gamma
ENSG00000175048.16	1.08	0.75	0.79	0.87	ZDHHC14	chr6	protein_coding	zinc finger, DHHC-type containing 14
ENSG00000122406.12	854.13	1039.14	877.53	806.22	RPL5	chr1	protein_coding	ribosomal protein L5
ENSG00000213717.3	0	0	0.36	0	AC004692.5	chr7	processed_pseudogene
ENSG00000181781.9	0.14	0.14	0.19	0.02	ODF3L2	chr19	protein_coding	outer dense fiber of sperm tails 3-like 2
ENSG00000213694.3	0.37	0.18	0.32	0.35	S1PR3	chr9	protein_coding	sphingosine-1-phosphate receptor 3
ENSG00000144161.12	2.02	2.93	4.17	4.09	ZC3H8	chr2	protein_coding	zinc finger CCCH-type containing 8
ENSG00000268736.1	0	0	0.37	0	RP11-1281K21.6	chr4	processed_pseudogene
ENSG00000120705.12	45.54	62.67	70.04	63.33	ETF1	chr5	protein_coding	eukaryotic translation termination factor 1
ENSG00000260853.1	0	0	0.03	0	RP11-264B17.2	chr16	antisense
ENSG00000180818.4	34.42	25.79	24.75	28.02	HOXC10	chr12	protein_coding	homeobox C10
ENSG00000164294.13	9.45	13.8	14.66	13.17	GPX8	chr5	protein_coding	glutathione peroxidase 8 (putative)
ENSG00000011083.8	0.07	0.03	0.04	0.04	SLC6A7	chr5	protein_coding	solute carrier family 6 (neurotransmitter transporter), member 7
ENSG00000087589.16	0.16	0.03	0.06	0.02	CASS4	chr20	protein_coding	Cas scaffolding protein family member 4
ENSG00000065485.17	22.74	18.17	18.32	21.53	PDIA5	chr3	protein_coding	protein disulfide isomerase family A, member 5
ENSG00000006576.16	1.97	3.5	5.3	3.61	PHTF2	chr7	protein_coding	putative homeodomain transcription factor 2
ENSG00000261253.2	2.82	1.17	1.71	1.18	AC137932.6	chr16	antisense
ENSG00000151726.13	1.01	1.01	1.44	1.72	ACSL1	chr4	protein_coding	acyl-CoA synthetase long-chain family member 1
ENSG00000178149.16	10.05	9.54	6.27	8.34	DALRD3	chr3	protein_coding	DALR anticodon binding domain containing 3
ENSG00000108298.9	1140.55	1299.65	965.83	836.91	RPL19	chr17	protein_coding	ribosomal protein L19
ENSG00000224854.3	0	0	0	0.22	CDKN2A-AS1	chr9	lincRNA	CDKN2A antisense RNA 1 (head to head)
ENSG00000273549.1	0	0.18	0	0	Metazoa_SRP	chr5	misc_RNA
ENSG00000182093.14	8.39	11.34	10.39	9.37	WRB	chr21	protein_coding	tryptophan rich basic protein
ENSG00000105650.21	0.43	0.58	0.77	0.5	PDE4C	chr19	protein_coding	phosphodiesterase 4C, cAMP-specific
ENSG00000167515.10	13.85	18.74	11.27	10.86	TRAPPC2L	chr16	protein_coding	trafficking protein particle complex 2-like
ENSG00000200312.1	0	0.15	0	0	RN7SKP255	chr14	misc_RNA	RNA, 7SK small nuclear pseudogene 255
ENSG00000202363.1	0.59	4.77	4.48	2.15	SNORA62	chr3	snoRNA	small nucleolar RNA, H/ACA box 62
ENSG00000117983.17	0.01	0.05	0	0.02	MUC5B	chr11	protein_coding	mucin 5B, oligomeric mucus/gel-forming
ENSG00000265491.4	4.24	6.42	6.14	6.34	RNF115	chr1	protein_coding	ring finger protein 115
ENSG00000219438.8	0	0.02	0	0.02	FAM19A5	chr22	protein_coding	family with sequence similarity 19 (chemokine (C-C motif)-like), member A5
ENSG00000266904.5	0.1	0.06	0.28	0.1	CTC-559E9.1	chr19	lincRNA
ENSG00000157778.8	25.66	30.31	23.59	21.31	PSMG3	chr7	protein_coding	proteasome (prosome, macropain) assembly chaperone 3
ENSG00000136247.14	25.13	25.47	22	21.47	ZDHHC4	chr7	protein_coding	zinc finger, DHHC-type containing 4
ENSG00000147416.10	35.65	34.22	29.46	30.96	ATP6V1B2	chr8	protein_coding	ATPase, H+ transporting, lysosomal 56/58kDa, V1 subunit B2
ENSG00000164284.14	4.06	4.06	8.43	7.95	GRPEL2	chr5	protein_coding	GrpE-like 2, mitochondrial (E. coli)
ENSG00000236565.3	0.11	0	0	0	HNRNPA3P5	chr13	processed_pseudogene	heterogeneous nuclear ribonucleoprotein A3 pseudogene 5
ENSG00000125968.8	51.19	58.86	34.91	38.47	ID1	chr20	protein_coding	inhibitor of DNA binding 1, dominant negative helix-loop-helix protein
ENSG00000274245.1	0.2	0.39	0.22	0.21	RP11-357P18.2	chr1	lincRNA
ENSG00000223382.3	0.45	0	0	0	RP1-65J11.1	chr1	lincRNA
ENSG00000156603.14	13.89	16.52	13.34	11.7	MED19	chr11	protein_coding	mediator complex subunit 19
ENSG00000179981.9	0.69	0.55	0.77	0.96	TSHZ1	chr18	protein_coding	teashirt zinc finger homeobox 1
ENSG00000047932.13	2.47	3.96	6.25	5.96	GOPC	chr6	protein_coding	golgi-associated PDZ and coiled-coil motif containing
ENSG00000222005.8	0	0	0	0.11	LINC01118	chr2	lincRNA	long intergenic non-protein coding RNA 1118
ENSG00000227896.2	0.13	0.27	0.25	0.33	RP11-77P6.2	chr10	antisense
ENSG00000148824.18	0.64	1.03	0.56	0.4	MTG1	chr10	protein_coding	mitochondrial ribosome-associated GTPase 1
ENSG00000174951.10	0.35	0.55	0.5	0.36	FUT1	chr19	protein_coding	fucosyltransferase 1 (galactoside 2-alpha-L-fucosyltransferase, H blood group)
ENSG00000164292.12	4.08	4.6	8	6.63	RHOBTB3	chr5	protein_coding	Rho-related BTB domain containing 3
ENSG00000271303.1	27	23.56	24.57	23.71	SRXN1	chr20	protein_coding	sulfiredoxin 1
ENSG00000120159.11	5.23	6.08	5.71	5.27	CAAP1	chr9	protein_coding	caspase activity and apoptosis inhibitor 1
ENSG00000152292.16	0.1	0.04	0.08	0.05	SH2D6	chr2	protein_coding	SH2 domain containing 6
ENSG00000115540.14	1.85	2.68	2.29	2.04	MOB4	chr2	protein_coding	MOB family member 4, phocein
ENSG00000236662.1	0.13	0	0.89	0.21	RP11-108L7.4	chr10	antisense
ENSG00000247271.6	0.94	1.16	0.65	1.02	ZBED5-AS1	chr11	antisense	ZBED5 antisense RNA 1
ENSG00000225808.1	1	0	0	0.23	DNAJC19P5	chr2	processed_pseudogene	DnaJ (Hsp40) homolog, subfamily C, member 19 pseudogene 5
ENSG00000279187.1	0	0	0.05	0	RP11-455O6.5	chr17	TEC
ENSG00000197860.9	1.29	1.7	2.89	2.45	SGTB	chr5	protein_coding	small glutamine-rich tetratricopeptide repeat (TPR)-containing, beta
ENSG00000137745.11	0	0	0.16	0.39	MMP13	chr11	protein_coding	matrix metallopeptidase 13
ENSG00000230368.2	0.32	0.39	0.29	0	FAM41C	chr1	lincRNA	family with sequence similarity 41, member C
ENSG00000279777.1	2.3	1.7	4.06	3.02	AC004813.1	chr12	protein_coding
ENSG00000164109.13	7.08	11.45	10.04	9.31	MAD2L1	chr4	protein_coding	MAD2 mitotic arrest deficient-like 1 (yeast)
ENSG00000149639.14	6.77	5.17	4.83	7.29	SOGA1	chr20	protein_coding	suppressor of glucose, autophagy associated 1
ENSG00000278662.4	0.14	0.09	0.68	0.42	GOLGA6L10	chr15	protein_coding	golgin A6 family-like 10
ENSG00000261567.1	0.16	0	0	0.38	RP11-680G10.1	chr16	lincRNA
ENSG00000133943.20	0.25	0.14	0.28	0.25	C14orf159	chr14	protein_coding	chromosome 14 open reading frame 159
ENSG00000087085.13	0.19	0.37	0.12	0.17	ACHE	chr7	protein_coding	acetylcholinesterase (Yt blood group)
ENSG00000235049.1	0	0.04	0	0	LINC00940	chr12	lincRNA	long intergenic non-protein coding RNA 940
ENSG00000163050.16	6.66	5.83	7.71	7.32	ADCK3	chr1	protein_coding	aarF domain containing kinase 3
ENSG00000048392.11	1.1	2.02	3.58	2.6	RRM2B	chr8	protein_coding	ribonucleotide reductase M2 B (TP53 inducible)
ENSG00000238045.9	0.21	0	0.09	0.07	PAGR1	chr16	antisense	PAXIP1 associated glutamate-rich protein 1
ENSG00000173653.7	17.34	16.91	11.43	15.12	RCE1	chr11	protein_coding	Ras converting CAAX endopeptidase 1
ENSG00000273419.1	0.06	0	0.01	0.01	RP4-751H13.7	chr7	antisense
ENSG00000251485.1	0	0	0.29	0.14	AC068134.10	chr2	processed_pseudogene
ENSG00000256235.1	0.31	0.35	0.13	0.16	SMIM3	chr5	protein_coding	small integral membrane protein 3
ENSG00000135454.13	8.99	5.07	5.5	5.44	B4GALNT1	chr12	protein_coding	beta-1,4-N-acetyl-galactosaminyl transferase 1
ENSG00000228794.8	0.94	1.61	1.62	1.84	LINC01128	chr1	processed_transcript	long intergenic non-protein coding RNA 1128
ENSG00000205208.4	2.32	3.7	5.25	4.75	C4orf46	chr4	protein_coding	chromosome 4 open reading frame 46
ENSG00000174365.19	6.9	9.78	4.47	4.95	SNHG11	chr20	processed_transcript	small nucleolar RNA host gene 11
ENSG00000130821.15	122.8	86.51	90.45	99.14	SLC6A8	chrX	protein_coding	solute carrier family 6 (neurotransmitter transporter), member 8
ENSG00000107443.15	0.87	2.17	2.41	1.57	CCNJ	chr10	protein_coding	cyclin J
ENSG00000261771.5	0.35	0.38	0.61	0.49	DYX1C1-CCPG1	chr15	processed_transcript	DYX1C1-CCPG1 readthrough (NMD candidate)
ENSG00000219163.2	0	0	0.28	0	HMGB1P20	chr6	processed_pseudogene	high mobility group box 1 pseudogene 20
ENSG00000197122.11	12.05	9.77	8.46	10.89	SRC	chr20	protein_coding	SRC proto-oncogene, non-receptor tyrosine kinase
ENSG00000154122.12	34.7	28.1	34.12	37.53	ANKH	chr5	protein_coding	ANKH inorganic pyrophosphate transport regulator
ENSG00000272656.1	0	0	0.77	0	RP11-219D15.3	chr3	antisense
ENSG00000265354.3	72.22	95.66	76.76	71.47	TIMM23	chr10	protein_coding	translocase of inner mitochondrial membrane 23 homolog (yeast)
ENSG00000261664.5	0	0	0	0.09	TTC39A-AS1	chr1	antisense	TTC39A antisense RNA 1
ENSG00000170113.15	5.52	5.95	8.94	8.94	NIPA1	chr15	protein_coding	non imprinted in Prader-Willi/Angelman syndrome 1
ENSG00000075539.13	1.13	1.44	1.74	0.91	FRYL	chr4	protein_coding	FRY-like
ENSG00000101040.19	5.99	5.32	6.47	8.34	ZMYND8	chr20	protein_coding	zinc finger, MYND-type containing 8
ENSG00000143355.15	0.04	0.08	0.01	0.07	LHX9	chr1	protein_coding	LIM homeobox 9
ENSG00000119421.6	124.59	115.27	89.09	81.72	NDUFA8	chr9	protein_coding	NADH dehydrogenase (ubiquinone) 1 alpha subcomplex, 8, 19kDa
ENSG00000165527.6	18.18	20.49	19.96	18.47	ARF6	chr14	protein_coding	ADP-ribosylation factor 6
ENSG00000230088.1	0.69	0	0	0	KRT16P5	chr17	processed_pseudogene	keratin 16 pseudogene 5
ENSG00000103485.17	38.79	38.66	34.95	41.51	QPRT	chr16	protein_coding	quinolinate phosphoribosyltransferase
ENSG00000179331.2	0	0.07	0	0	RAB39A	chr11	protein_coding	RAB39A, member RAS oncogene family
ENSG00000137975.7	0.21	0.08	0.06	0	CLCA2	chr1	protein_coding	chloride channel accessory 2
ENSG00000256742.1	0	1.42	0.84	0.81	RP13-941N14.1	chr12	lincRNA
ENSG00000263528.7	9.76	5.67	6.04	5.44	IKBKE	chr1	protein_coding	inhibitor of kappa light polypeptide gene enhancer in B-cells, kinase epsilon
ENSG00000136147.16	2.53	2.52	2.64	2.31	PHF11	chr13	protein_coding	PHD finger protein 11
ENSG00000072952.18	0.14	0.03	0.06	0.01	MRVI1	chr11	protein_coding	murine retrovirus integration site 1 homolog
ENSG00000003056.7	65.26	67.8	62.72	60.59	M6PR	chr12	protein_coding	mannose-6-phosphate receptor (cation dependent)
ENSG00000135241.16	4.16	7.06	7.29	7.64	PNPLA8	chr7	protein_coding	patatin-like phospholipase domain containing 8
ENSG00000130433.7	1.15	0.76	1.01	1.02	CACNG6	chr19	protein_coding	calcium channel, voltage-dependent, gamma subunit 6
ENSG00000267185.1	0	0.19	0.56	0.23	PTP4A2P1	chr17	processed_pseudogene	protein tyrosine phosphatase type IVA, member 2 pseudogene 1
ENSG00000252311.1	0	1.09	1.83	0.58	RNU1-103P	chr16	snRNA	RNA, U1 small nuclear 103, pseudogene
ENSG00000126814.6	1.6	2.51	3.28	2.82	TRMT5	chr14	protein_coding	tRNA methyltransferase 5
ENSG00000120334.15	5.85	5.81	6.73	6.18	CENPL	chr1	protein_coding	centromere protein L
ENSG00000269106.1	0.89	0	0.65	0.98	CTD-2619J13.23	chr19	antisense
ENSG00000225205.5	0.58	0.33	0.42	0.53	AC093818.1	chr2	antisense
ENSG00000218336.7	0.03	0.02	0	0.02	TENM3	chr4	protein_coding	teneurin transmembrane protein 3
ENSG00000267011.5	0	0	0.36	0	CTB-50L17.16	chr19	lincRNA
ENSG00000231584.8	2.74	2.29	1.66	1.88	FAHD2CP	chr2	transcribed_unprocessed_pseudogene	fumarylacetoacetate hydrolase domain containing 2C, pseudogene
ENSG00000185532.14	0.11	0.2	0.23	0.12	PRKG1	chr10	protein_coding	protein kinase, cGMP-dependent, type I
ENSG00000239039.1	0	0	0	1.4	SNORD13	chr8	snoRNA	small nucleolar RNA, C/D box 13
ENSG00000232519.2	0	0	0	0.5	RP11-29H23.4	chr1	antisense
ENSG00000169180.11	51.07	43.11	44.63	51.03	XPO6	chr16	protein_coding	exportin 6
ENSG00000187676.7	3.43	2.23	4.25	3.48	B3GLCT	chr13	protein_coding
ENSG00000047230.14	3.48	4.42	5.48	4.76	CTPS2	chrX	protein_coding	CTP synthase 2
ENSG00000091490.10	9.41	7.84	9.43	10.22	SEL1L3	chr4	protein_coding	sel-1 suppressor of lin-12-like 3 (C. elegans)
ENSG00000234693.1	0	0.05	0	0	RP4-530I15.6	chr20	antisense
ENSG00000138002.14	4.74	3.4	4.21	5.33	IFT172	chr2	protein_coding	intraflagellar transport 172
ENSG00000243103.3	0	0	0.13	0	RN7SL452P	chr14	misc_RNA	RNA, 7SL, cytoplasmic 452, pseudogene
ENSG00000057149.14	0.17	0	0.19	0.08	SERPINB3	chr18	protein_coding	serpin peptidase inhibitor, clade B (ovalbumin), member 3
ENSG00000187626.8	4.94	4.01	2.9	3.12	ZKSCAN4	chr6	protein_coding	zinc finger with KRAB and SCAN domains 4
ENSG00000274349.4	0	0.2	0.27	0.13	ZNF658	chr9	protein_coding	zinc finger protein 658
ENSG00000274697.1	0	0	0	0.51	MIR6761	chr12	miRNA	microRNA 6761
ENSG00000275248.1	0.49	0	0	0	RP11-40E6.2	chr13	lincRNA
ENSG00000102471.13	9.21	11.84	12.41	13.01	NDFIP2	chr13	protein_coding	Nedd4 family interacting protein 2
ENSG00000167701.13	0.27	0.42	0.28	0.29	GPT	chr8	protein_coding	glutamic-pyruvate transaminase (alanine aminotransferase)
ENSG00000170837.2	0	0.02	0	0	GPR27	chr3	protein_coding	G protein-coupled receptor 27
ENSG00000124788.17	1.77	1.74	3.36	2.91	ATXN1	chr6	protein_coding	ataxin 1
ENSG00000153495.10	0	2.25	0.32	0.51	TEX29	chr13	protein_coding	testis expressed 29
ENSG00000257817.1	0	0	0.03	0	RP4-601P9.2	chr12	lincRNA
ENSG00000153944.10	3.53	4.45	8.16	7.49	MSI2	chr17	protein_coding	musashi RNA-binding protein 2
ENSG00000164363.9	0.23	0.15	0	0	SLC6A18	chr5	protein_coding	solute carrier family 6 (neutral amino acid transporter), member 18
ENSG00000168014.16	4.24	3.79	4.68	5.62	C2CD3	chr11	protein_coding	C2 calcium-dependent domain containing 3
ENSG00000142961.14	2.37	2.24	2.05	2.4	MOB3C	chr1	protein_coding	MOB kinase activator 3C
ENSG00000170860.3	22.49	27.15	20.66	19.21	LSM3	chr3	protein_coding	LSM3 homolog, U6 small nuclear RNA associated (S. cerevisiae)
ENSG00000139209.15	0.06	0.06	0.18	0.27	SLC38A4	chr12	protein_coding	solute carrier family 38, member 4
ENSG00000134321.11	0.06	0.1	0.03	0.02	RSAD2	chr2	protein_coding	radical S-adenosyl methionine domain containing 2
ENSG00000118762.7	0.71	1.46	1.84	1.95	PKD2	chr4	protein_coding	polycystic kidney disease 2 (autosomal dominant)
ENSG00000268870.1	0	0	0.19	0	CTD-3105H18.16	chr19	protein_coding
ENSG00000114331.12	2.31	3.84	5.93	4.57	ACAP2	chr3	protein_coding	ArfGAP with coiled-coil, ankyrin repeat and PH domains 2
ENSG00000183793.13	1.4	0.48	0.7	1.03	NPIPA5	chr16	protein_coding	nuclear pore complex interacting protein family, member A5
ENSG00000116990.10	0.61	0.31	0.45	0.74	MYCL	chr1	protein_coding	v-myc avian myelocytomatosis viral oncogene lung carcinoma derived homolog
ENSG00000229222.1	0	0.14	0.44	0.45	KRT18P4	chr20	processed_pseudogene	keratin 18 pseudogene 4
ENSG00000120694.19	21.43	29.13	46.92	43.2	HSPH1	chr13	protein_coding	heat shock 105kDa/110kDa protein 1
ENSG00000146842.16	11.2	11.77	14.52	16.17	TMEM209	chr7	protein_coding	transmembrane protein 209
ENSG00000185480.11	3.7	5.65	6.03	5.57	PARPBP	chr12	protein_coding	PARP1 binding protein
ENSG00000163608.14	4.52	5.52	7.84	6.27	C3orf17	chr3	protein_coding	chromosome 3 open reading frame 17
ENSG00000235097.1	0	0	0.07	0.07	LINC00330	chr13	lincRNA	long intergenic non-protein coding RNA 330
ENSG00000254431.1	0	0	0.16	0.15	RP11-550A5.2	chr8	antisense
ENSG00000162702.7	3.97	6.13	7.69	6.77	ZNF281	chr1	protein_coding	zinc finger protein 281
ENSG00000135677.10	27.73	24.54	28.83	32.2	GNS	chr12	protein_coding	glucosamine (N-acetyl)-6-sulfatase
ENSG00000178172.6	5.56	11.2	7.94	4.53	SPINK6	chr5	protein_coding	serine peptidase inhibitor, Kazal type 6
ENSG00000163788.13	1.8	3.19	4.32	4.31	SNRK	chr3	protein_coding	SNF related kinase
ENSG00000181274.6	12.51	10.28	9.92	12.11	FRAT2	chr10	protein_coding	frequently rearranged in advanced T-cell lymphomas 2
ENSG00000069020.18	0.06	0.04	0.06	0.04	MAST4	chr5	protein_coding	microtubule associated serine/threonine kinase family member 4
ENSG00000275056.1	0	0.17	0.1	0	RP11-127I20.8	chr16	sense_intronic
ENSG00000204580.11	11.43	8.07	7.51	10.54	DDR1	chr6	protein_coding	discoidin domain receptor tyrosine kinase 1
ENSG00000273262.1	0.17	0	0	0	RP11-18I14.11	chr10	antisense
ENSG00000108061.11	3.98	8.05	10.11	8.46	SHOC2	chr10	protein_coding	soc-2 suppressor of clear homolog (C. elegans)
ENSG00000198574.5	2.42	2.24	2.38	2.14	SH2D1B	chr1	protein_coding	SH2 domain containing 1B
ENSG00000204613.10	0.18	0	0.11	0.03	TRIM10	chr6	protein_coding	tripartite motif containing 10
[truncated: 21,765 more rows]
